# Supplementary material
Source: publisher figshare collection journal article supplement (https://gsapubs.figshare.com/ndownloader/files/31786496)
Supplement: Supplementary file 1 [file 31786496]

## Sheet: Table S-3 U-Th-Pb_UALaserChron
Table S-3. U-Th-Pb isotopic composition of detrital zircons analyzed at the University of Arizona LaserChron Center
				Isotopic Ratios								Apparent Ages
Analysis	U	206Pb	U/Th	206Pb*	±	207Pb*	±	206Pb*	±	error		206Pb*	±	207Pb*	±	206Pb*	±	Best	±	Conc.
	(ppm)	204Pb		207Pb*	(%)	235U	(%)	238U	(%)	corr.		238U	(Ma)	235U	(Ma)	207Pb*	(Ma)	age†	(Ma)	(%)
JG-WR49
JG-WR49-1	253.184	6064.93	2.23784	17.1233	1.12933	0.619971	3.56229	0.0797627	0.619641	0.173945		494.706	2.95073	489.829	13.8436	468.048	77.6968	494.706	2.95073	105.696
JG-WR49-2	451.43	5708.96	2.31292	18.6908	1.32082	0.28253	4.20137	0.0399658	0.552087	0.131407		252.621	1.36771	252.662	9.39787	254.052	95.8194	252.621	1.36771	99.4366
JG-WR49-3	251.18	2649.93	2.39457	18.0979	1.46495	0.284876	2.58062	0.0412083	0.508994	0.197237		260.318	1.29861	254.518	5.8097	202.405	58.7286	260.318	1.29861	128.613
JG-WR49-4	104.008	1902.93	1.41559	15.6932	2.82477	0.379941	12.1531	0.0487306	0.489141	0.0402482		306.724	1.46518	326.995	33.9887	474.896	269.445	306.724	1.46518	64.5875
JG-WR49-5	224.257	24533.5	1.60916	7.50888	0.438502	7.24662	0.624353	0.392854	0.403413	0.64613		2136.05	7.3349	2142.26	5.57088	2148.96	8.32186	2148.96	8.32186	99.3992
JG-WR49-6	326.475	6181.87	2.87254	18.4629	1.04822	0.423979	2.54255	0.0588627	0.477143	0.187663		368.705	1.70989	358.892	7.68684	296.904	56.9855	368.705	1.70989	124.183
JG-WR49-7	425.269	2417.9	1.67936	18.0045	1.141	0.284286	5.28503	0.0413287	0.440352	0.0833208		261.064	1.12663	254.052	11.8793	190.847	122.573	261.064	1.12663	136.792
JG-WR49-8	225.91	1400.62	1.33074	16.4876	2.13891	0.199576	7.48913	0.0286566	0.560002	0.0747754		182.135	1.00568	184.768	12.6522	219.549	173	182.135	1.00568	82.9587
JG-WR49-9	451.201	5677.87	2.57697	18.8393	1.12484	0.255801	2.27519	0.0364859	0.586512	0.257786		231.014	1.33093	231.277	4.70578	234.98	50.7311	231.014	1.33093	98.312
JG-WR49-10	559.493	6380.69	2.9597	19.1417	1.00341	0.259623	2.02917	0.0375835	0.496716	0.244788		237.837	1.15985	234.363	4.24673	200.7	45.6649	237.837	1.15985	118.504
JG-WR49-11	399.402	7514.76	1.29175	17.2304	0.796232	0.638949	1.69954	0.08268	0.542844	0.319406		512.1	2.67235	501.655	6.72774	455.267	35.7419	512.1	2.67235	112.483
JG-WR49-12	381.897	5992.28	1.58153	18.8679	1.18867	0.304119	3.90865	0.0436792	0.501775	0.128376		275.598	1.35374	269.612	9.25539	218.933	89.7552	275.598	1.35374	125.882
JG-WR49-13	435.819	5348.05	1.46025	19.0853	1.11805	0.263498	5.47918	0.038533	0.550467	0.100465		243.734	1.31663	237.482	11.6029	177.076	127.218	243.734	1.31663	137.643
JG-WR49-14	94.2384	2928.02	2.64583	16.7557	1.69738	0.675167	4.76757	0.08961	0.525453	0.110214		553.23	2.78572	523.849	19.5134	398.695	106.235	553.23	2.78572	138.76
JG-WR49-15	152.535	4047.92	1.70032	16.5085	1.48201	0.582213	4.40648	0.0741822	0.602726	0.136782		461.303	2.68324	465.883	16.4656	489.456	96.3538	461.303	2.68324	94.248
JG-WR49-16	641.598	12615.8	2.58509	18.7693	0.837626	0.383489	1.33129	0.0534226	0.54071	0.406157		335.5	1.76769	329.602	3.74697	289.158	27.8	335.5	1.76769	116.027
JG-WR49-17	446.032	9301.17	1.94159	17.6905	0.802511	0.561295	2.0794	0.0739029	0.60534	0.291113		459.627	2.68543	452.369	7.59071	416.599	44.4476	459.627	2.68543	110.328
JG-WR49-18	203.756	4794.21	5.59536	17.1482	1.3881	0.583473	2.92515	0.0763841	0.500506	0.171105		474.504	2.28962	466.691	10.9447	429.387	64.2699	474.504	2.28962	110.507
JG-WR49-19	251.402	3244.93	1.63226	17.7041	1.78968	0.271401	6.14432	0.0377916	0.461348	0.0750853		239.13	1.08301	243.813	13.3186	290.159	140.087	239.13	1.08301	82.4134
JG-WR49-20	139.749	3393.28	1.50045	16.1326	1.52123	0.701931	2.35049	0.0880214	0.52342	0.222685		543.825	2.72973	539.943	9.84362	524.521	50.2673	543.825	2.72973	103.68
JG-WR49-21	429.809	5532.91	0.850096	18.289	1.40188	0.3116	2.59282	0.0433373	0.773372	0.298275		273.486	2.07083	275.421	6.25467	292.88	56.5183	273.486	2.07083	93.3781
JG-WR49-22	295.584	5271.25	3.12296	18.2629	1.18899	0.391989	1.94513	0.05464	0.659487	0.339045		342.946	2.20257	335.821	5.56186	287.759	41.8146	342.946	2.20257	119.178
JG-WR49-23	171.707	10084	3.40913	13.1951	0.673254	1.90356	1.33007	0.185297	0.492826	0.370525		1095.85	4.96653	1082.34	8.85427	1056.13	24.8822	1056.13	24.8822	103.761
JG-WR49-24	144.221	6908.54	2.56671	13.5434	0.969101	1.59054	1.40426	0.160444	0.68667	0.488992		959.244	6.1202	966.511	8.7547	983.96	24.9384	983.96	24.9384	97.4881
JG-WR49-25	301.759	2783.85	1.3273	17.847	1.53205	0.276018	8.193	0.0393688	0.581582	0.0709852		248.919	1.42008	247.494	17.997	235.024	188.829	248.919	1.42008	105.912
JG-WR49-26	132.329	2443.29	2.79978	16.1328	2.64644	0.331647	4.42485	0.0428082	0.372856	0.0842642		270.216	0.986693	290.823	11.1901	460.774	97.808	270.216	0.986693	58.6439
JG-WR49-27	126.583	2728.37	2.54848	16.9081	1.79534	0.506504	7.73323	0.0682198	0.496043	0.0641444		425.421	2.04215	416.096	26.4059	365.668	174.171	425.421	2.04215	116.341
JG-WR49-28	382.527	13088.6	6.205	16.6428	0.845939	0.779584	1.93699	0.0957661	0.632564	0.326571		589.549	3.56383	585.246	8.61612	569.558	39.8237	589.549	3.56383	103.51
JG-WR49-29	136.627	2157.41	5.28879	17.3109	2.01621	0.361033	7.08385	0.0513178	0.500727	0.0706856		322.607	1.57563	312.985	19.0822	242.908	162.993	322.607	1.57563	132.811
JG-WR49-30	361.322	5102.32	2.04917	18.5586	1.25958	0.312058	4.15942	0.0443233	0.610194	0.146701		279.575	1.66949	275.775	10.0452	244.663	94.8311	279.575	1.66949	114.27
JG-WR49-31	119.185	743.063	1.40895	11.0837	7.14961	0.196951	26.4923	0.0201125	0.539876	0.0203786		128.367	0.686167	182.543	44.2901	958.907	550.614	128.367	0.686167	13.3868
JG-WR49-32	411.67	5438.05	3.11011	18.7688	1.07504	0.303641	5.21925	0.043468	0.512665	0.0982257		274.294	1.37671	269.24	12.3442	226.508	120.097	274.294	1.37671	121.097
JG-WR49-33	228.578	3356.79	2.61866	17.6265	1.80269	0.325938	5.27394	0.0450654	0.492639	0.0934101		284.155	1.36945	286.46	13.1644	306.329	119.691	284.155	1.36945	92.7612
JG-WR49-34	168.226	2078.88	1.05621	16.683	2.17042	0.298236	5.69121	0.0408218	0.414485	0.072829		257.925	1.04795	265.022	13.276	329.222	128.886	257.925	1.04795	78.3436
JG-WR49-35	181.842	1701.26	0.794851	17.2879	2.07902	0.211873	16.5768	0.0311846	0.514493	0.031037		197.958	1.003	195.124	29.4355	161.975	NA	197.958	1.003	122.216
JG-WR49-36	253.698	1454.32	1.01352	17.6936	1.64135	0.252093	13.163	0.0392931	0.381172	0.0289578		248.45	0.929005	228.275	26.9161	26.2514	NA	248.45	0.929005	946.423
JG-WR49-37	128.901	6437.93	2.07116	13.5768	0.950514	1.72516	1.8113	0.174183	0.530096	0.292661		1035.12	5.06923	1017.95	11.6433	982.113	35.2651	982.113	35.2651	105.397
JG-WR49-38	104.33	2534.6	1.84721	17.1173	1.65982	0.598012	7.24682	0.0819201	0.413653	0.0570806		507.573	2.01906	475.972	27.5432	327.415	164.409	507.573	2.01906	155.024
JG-WR49-39	300.643	3498.83	2.68091	18.3703	1.18209	0.298655	3.02879	0.0428786	0.393484	0.129915		270.651	1.04292	265.349	7.07265	219.783	69.4828	270.651	1.04292	123.145
JG-WR49-40	182.039	2610.64	0.699675	17.0419	1.98431	0.301329	6.46057	0.0410277	0.517942	0.0801698		259.2	1.31587	267.438	15.191	341.184	145.919	259.2	1.31587	75.9706
JG-WR49-41	1070.21	10048.3	2.64121	19.456	0.627235	0.244744	1.68995	0.03548	0.480722	0.28446		224.755	1.06183	222.298	3.37393	197.362	37.6658	224.755	1.06183	113.88
JG-WR49-42	526.577	3852.78	1.62656	18.4839	1.54489	0.154346	5.11246	0.0222195	0.645505	0.126261		141.668	0.904496	145.742	6.94106	213.609	117.525	141.668	0.904496	66.321
JG-WR49-43	300.194	3492.5	1.6647	18.2412	1.45418	0.315656	4.83968	0.0451418	0.540579	0.111697		284.626	1.50515	278.555	11.7906	228.866	111.152	284.626	1.50515	124.363
JG-WR49-44	420.655	10277	3.51406	13.8459	0.517302	1.41226	0.927354	0.144328	0.479211	0.516751		869.09	3.89623	894.108	5.51277	957.356	16.2094	957.356	16.2094	90.7802
JG-WR49-45	556.839	13896.3	2.27372	17.8194	0.737213	0.57133	1.7941	0.0751892	0.508248	0.283289		467.344	2.29121	458.874	6.62372	417.639	38.4571	467.344	2.29121	111.901
JG-WR49-46	344.845	1994.33	1.03079	17.8258	1.50198	0.22842	3.24711	0.0339408	0.447379	0.137778		215.165	0.946717	208.894	6.13084	139.733	75.5475	215.165	0.946717	153.984
JG-WR49-47	266.555	3481.89	1.10097	17.7012	1.92147	0.259595	2.77266	0.0359414	0.51502	0.185749		227.627	1.15187	234.34	5.80224	303.207	62.1049	227.627	1.15187	75.0732
JG-WR49-48	284.248	5954.28	2.74352	18.0639	1.02687	0.510885	3.17796	0.069906	0.517381	0.162803		435.589	2.1792	419.044	10.9116	329.928	71.145	435.589	2.1792	132.025
JG-WR49-49	323.741	14815.3	10.8843	13.253	0.519364	1.86219	0.911595	0.180958	0.49684	0.545022		1072.2	4.90769	1067.77	6.0223	1059.6	15.4021	1059.6	15.4021	101.189
JG-WR49-50	676.346	4369.98	0.978191	18.8728	1.43787	0.139093	6.05646	0.0202927	0.582291	0.0961438		129.506	0.746576	132.236	7.50936	182.556	140.568	129.506	0.746576	70.9402
JG-WR49-51	247.584	2612.54	1.31435	17.6296	1.83188	0.270357	4.38366	0.0383571	0.52695	0.120208		242.641	1.25484	242.979	9.47308	247.232	100.243	242.641	1.25484	98.1432
JG-WR49-52	1221.2	15774.7	2.64215	19.4454	0.676938	0.255958	0.934454	0.0367546	0.472971	0.506146		232.685	1.08091	231.404	1.93367	219.438	18.6413	232.685	1.08091	106.037
JG-WR49-53	36.6189	6995.83	1.94497	5.0187	0.772148	15.6877	1.13019	0.575681	0.726661	0.642955		2931.11	17.1145	2857.97	10.7885	2807.51	14.1539	2807.51	14.1539	104.402
JG-WR49-54	504.555	17035.2	2.78507	13.3727	0.518934	1.7503	0.811892	0.171634	0.485489	0.597972		1021.11	4.58467	1027.27	5.24644	1041.3	13.1513	1041.3	13.1513	98.061
JG-WR49-55	395.018	5899.52	1.16305	18.4537	1.31277	0.278254	4.2826	0.03892	0.586184	0.136876		246.135	1.41561	249.271	9.46617	279.915	97.1394	246.135	1.41561	87.932
JG-WR49-56	266.598	6227.74	2.86356	17.2447	1.11461	0.618454	1.88122	0.0803151	0.48703	0.258891		498.004	2.33411	488.878	7.29934	447.284	40.3827	498.004	2.33411	111.339
JG-WR49-57	75.1755	975.208	1.99318	14.0364	4.30831	0.336065	12.6238	0.0431376	0.618567	0.049		272.252	1.649	294.186	32.2524	473.115	279.936	272.252	1.649	57.5447
JG-WR49-58	273.312	7290.71	1.2403	17.4464	0.90605	0.610631	2.92883	0.079773	0.544156	0.185793		494.767	2.59158	483.958	11.2752	434.032	64.1103	494.767	2.59158	113.993
JG-WR49-59	348.983	2341.28	3.10796	17.2051	2.09587	0.1543	6.60684	0.0215045	0.547324	0.0828421		137.158	0.742767	145.702	8.96773	288.162	150.615	137.158	0.742767	47.5973
JG-WR49-60	92.7061	1528.71	2.1934	15.5459	3.42988	0.318265	9.86138	0.0419848	0.727139	0.073736		265.124	1.88871	280.567	24.1789	412.318	220.37	265.124	1.88871	64.3007
JG-WR49-61	292.096	3141.32	1.40169	18.0115	1.49641	0.281539	4.76672	0.0401004	0.470321	0.0986677		253.455	1.16893	251.877	10.6334	238.231	109.448	253.455	1.16893	106.391
JG-WR49-62	159.223	2076.54	1.82672	16.963	2.03267	0.317764	7.62427	0.0443465	0.504904	0.0662232		279.719	1.38211	280.181	18.67	285.04	174.208	279.719	1.38211	98.133
JG-WR49-63	168.571	8284.25	3.65859	13.4229	0.785762	1.56861	1.37192	0.156097	0.542899	0.395721		935.048	4.72538	957.876	8.50719	1011.53	25.5422	1011.53	25.5422	92.4387
JG-WR49-64	97.9464	369.961	1.24058	12.0539	4.68797	0.152232	64.6735	0.0257193	0.480206	0.00742509		163.701	0.776204	143.88	86.9724	NA	NA	163.701	0.776204	NA
JG-WR49-65	86.9894	846.799	1.42655	14.4876	3.31083	0.272555	32.6293	0.0381714	0.461399	0.0141406		241.488	1.09361	244.734	71.0762	277.004	NA	241.488	1.09361	87.1787
JG-WR49-66	109.587	6149.25	2.11629	13.1222	0.858934	1.92284	1.9628	0.188151	0.517339	0.263572		1111.35	5.28114	1089.05	13.112	1045.63	38.19	1045.63	38.19	106.285
JG-WR49-67	364.783	1875.31	1.91447	16.836	1.96169	0.305177	14.1933	0.0426717	0.571814	0.0402876		269.372	1.50857	270.436	33.7097	280.672	NA	269.372	1.50857	95.9741
JG-WR49-68	461.936	6341.14	2.98093	18.0859	0.862539	0.444861	3.28417	0.060553	0.539953	0.16441		378.988	1.98736	373.674	10.2676	341.822	73.3496	378.988	1.98736	110.873
JG-WR49-69	63.442	889.591	3.25772	12.1555	4.11375	0.346396	11.8072	0.037804	0.733874	0.0621546		239.207	1.72331	302.007	30.854	821.698	246.88	239.207	1.72331	29.1113
JG-WR49-70	154.572	2017.63	1.90476	16.2358	2.73875	0.301908	8.11554	0.0400622	0.569693	0.0701978		253.219	1.4146	267.889	19.1114	399.134	181.678	253.219	1.4146	63.442
JG-WR49-71	172.024	9185.95	7.07537	13.2214	0.715004	1.82903	2.07533	0.177722	0.521924	0.25149		1054.52	5.0772	1055.93	13.6247	1059.75	40.4414	1059.75	40.4414	99.5066
JG-WR49-72	221.169	15105.8	4.52336	12.3093	0.610229	2.30749	1.36852	0.206385	0.573901	0.419359		1209.53	6.32918	1214.59	9.69472	1224.43	24.4075	1224.43	24.4075	98.7829
JG-WR49-73	139.448	2959.42	3.57239	17.0965	1.78243	0.392497	6.82888	0.0526426	0.447055	0.0654653		330.725	1.44124	336.192	19.5468	375.141	153.513	330.725	1.44124	88.1602
JG-WR49-74	732.535	19098.8	3.7851	15.2654	0.55244	0.944724	0.811919	0.104791	0.511571	0.630076		642.424	3.128	675.352	4.0049	787.656	13.2369	642.424	3.128	81.5614
JG-WR49-75	130.218	3293.32	3.77605	15.4392	1.57062	0.950532	5.28549	0.113078	0.450431	0.0852205		690.597	2.94984	678.38	26.1592	638.997	113.33	690.597	2.94984	108.075
JG-WR49-76	473.811	21751.9	2.96076	13.9835	0.586627	1.55522	1.07757	0.157217	0.576105	0.534636		941.294	5.04551	952.571	6.65953	979.583	18.5318	979.583	18.5318	96.0912
JG-WR49-77	299.657	8183.97	4.17133	16.5388	0.838946	0.808034	2.75358	0.0984439	0.548427	0.199169		605.283	3.16846	601.351	12.496	587.496	58.5553	605.283	3.16846	103.028
JG-WR49-78	368.267	10189.8	3.48959	16.6296	0.793427	0.777282	1.39066	0.0946675	0.538815	0.387452		583.083	3.00384	583.932	6.1756	588.181	27.8135	583.083	3.00384	99.1332
JG-WR49-79	175.832	7985.3	1.87495	13.2466	1.16999	1.82871	2.80973	0.177091	1.08847	0.387392		1051.06	10.5565	1055.82	18.4458	1066.55	52.1059	1066.55	52.1059	98.5477
JG-WR49-80	192.058	2655.31	1.74105	17.5314	1.91056	0.300672	8.64291	0.0417318	0.558903	0.0646661		263.559	1.44333	266.925	20.2896	297.569	197.128	263.559	1.44333	88.5707
JG-WR49-81	624.762	7357.64	2.07476	19.3472	1.02323	0.273278	3.4018	0.0393265	0.5939	0.174584		248.657	1.44865	245.311	7.41358	214.45	77.5908	248.657	1.44865	115.951
JG-WR49-82	291.537	3238.41	0.770489	18.256	1.72421	0.248881	7.34858	0.0353601	0.522693	0.0711283		224.008	1.15076	225.667	14.8708	243.997	169.061	224.008	1.15076	91.8076
JG-WR49-83	355.348	12141.3	2.05187	15.6722	0.69389	0.936896	1.54599	0.106988	0.567168	0.366863		655.232	3.53364	671.256	7.59331	726.318	30.4889	655.232	3.53364	90.2129
JG-WR49-84	229.828	12498.4	2.52454	13.1737	0.749599	1.93786	1.47993	0.185323	0.637925	0.431052		1095.99	6.42956	1094.26	9.91232	1091.67	26.7483	1091.67	26.7483	100.395
JG-WR49-85	697.391	8869.3	3.53644	18.9589	1.00338	0.270171	3.2236	0.0378127	0.747654	0.231931		239.261	1.75605	242.83	6.96233	278.507	71.8149	239.261	1.75605	85.9084
JG-WR49-86	3093.81	102388	13.3418	15.4251	0.544564	1.09841	0.770331	0.121418	0.536874	0.696939		738.722	3.7472	752.582	4.09434	794.896	11.5839	738.722	3.7472	92.9332
JG-WR49-87	166.253	7812.24	2.08113	13.2795	1.00548	1.79461	2.19262	0.174635	0.961855	0.438677		1037.6	9.2184	1043.5	14.2979	1056.78	39.6806	1056.78	39.6806	98.1848
JG-WR49-88	353.62	9129.61	6.99767	17.7467	0.957719	0.583322	2.28585	0.0762511	0.593656	0.259709		473.707	2.71135	466.594	8.55118	432.693	49.2042	473.707	2.71135	109.479
JG-WR49-89	156.617	2196.33	1.34612	17.1123	1.96231	0.311551	9.84338	0.0431373	0.479389	0.0487017		272.25	1.27796	275.382	23.7464	303.074	224.574	272.25	1.27796	89.8294
JG-WR49-90	329.722	3740.28	2.42186	18.7042	1.40629	0.241008	6.87589	0.0348738	0.693023	0.10079		220.98	1.50549	219.246	13.5594	201.672	158.96	220.98	1.50549	109.574
JG-WR49-91	542.854	15332.9	2.70141	16.9464	0.580176	0.713888	0.888276	0.0881243	0.45969	0.517508		544.434	2.39994	547.052	3.75688	558.899	16.5843	544.434	2.39994	97.4119
JG-WR49-92	259.153	12520.9	2.00121	13.5261	0.82838	1.71611	1.51636	0.168973	0.702779	0.463465		1006.45	6.54861	1014.57	9.72845	1033.01	27.172	1033.01	27.172	97.4283
JG-WR49-93	413.568	10467.7	2.00337	17.4765	0.863338	0.629635	1.45942	0.0809709	0.635252	0.435277		501.915	3.06746	495.868	5.7255	469.017	29.0902	501.915	3.06746	107.014
JG-WR49-94	128.684	2668.95	1.89554	16.9718	1.79512	0.481	8.08456	0.0647008	0.492106	0.0608699		404.15	1.92779	398.759	26.6671	368.584	182.046	404.15	1.92779	109.649
JG-WR49-95	314.035	5087.32	3.13631	18.2164	1.00349	0.393702	4.04174	0.0544139	0.477106	0.118045		341.563	1.5872	337.07	11.5935	307.154	91.4259	341.563	1.5872	111.203
JG-WR49-96	519.505	13008.9	2.92555	17.0712	0.670828	0.670589	0.978115	0.0839019	0.505423	0.516732		519.371	2.52206	521.071	3.98666	529.503	18.3691	519.371	2.52206	98.0864
JG-WR49-97	176.184	2467.81	1.58117	16.8376	2.42305	0.278559	6.6572	0.0374584	0.5063	0.076053		237.06	1.17843	249.514	14.7281	369.274	149.674	237.06	1.17843	64.1962
JG-WR49-98	156.906	9172.45	3.59061	12.8795	0.867647	2.02883	1.58684	0.191973	0.78329	0.493615		1132.06	8.13234	1125.23	10.7932	1112.91	27.5501	1112.91	27.5501	101.72
JG-WR49-99	249.368	4809.52	4.33096	16.9497	1.30421	0.629139	5.01028	0.0810272	0.503354	0.100464		502.251	2.43213	495.559	19.6487	465.706	110.49	502.251	2.43213	107.847
JG-WR49-100	436.993	4807.56	1.3818	18.332	1.09285	0.269884	3.92113	0.037777	0.594651	0.151653		239.039	1.39542	242.601	8.46182	278.232	88.7459	239.039	1.39542	85.9136
JG-WR49-101	598.919	2250.53	1.23494	18.3791	1.4136	0.294023	8.93395	0.0442791	0.478479	0.0535574		279.303	1.30787	261.721	20.6145	108.115	NA	279.303	1.30787	258.338
JG-WR49-102	137.874	4485.79	3.72432	16.9153	1.47521	0.697406	5.60516	0.0899769	0.809019	0.144335		555.401	4.30518	537.24	23.3881	461.819	123.013	555.401	4.30518	120.264
JG-WR49-103	293.106	3051.14	2.21118	18.0024	1.61337	0.267263	5.7706	0.0379719	0.484166	0.0839022		240.25	1.1418	240.503	12.3579	243.99	132.557	240.25	1.1418	98.467
JG-WR49-104	324.682	16196	8.00937	13.6101	0.571463	1.75262	1.32834	0.174426	0.467999	0.35232		1036.45	4.48074	1028.13	8.58797	1011.33	25.2035	1011.33	25.2035	102.485
JG-WR49-105	654.436	8210.77	1.11212	19.0005	0.840402	0.303766	1.69397	0.0431656	0.441338	0.260535		272.425	1.17726	269.338	4.00753	243.608	37.6909	272.425	1.17726	111.829
JG-WR49-106	283.881	3159.02	1.94841	18.0558	1.50447	0.262239	5.91598	0.0373423	0.544971	0.0921184		236.338	1.26465	236.47	12.4806	238.802	135.941	236.338	1.26465	98.9683
JG-WR49-107	466.476	7739.43	1.41585	19.2151	1.01269	0.272765	3.54102	0.0393004	0.49928	0.140999		248.495	1.21708	244.902	7.70561	211.589	81.265	248.495	1.21708	117.442
JG-WR49-108	279.953	11483	4.2827	13.7006	0.675452	1.51219	1.711	0.152174	0.526329	0.307615		913.141	4.48125	935.326	10.458	988.847	33.1211	988.847	33.1211	92.344
JG-WR49-109	289.131	8203.91	2.93252	16.2672	0.839806	0.849291	1.95855	0.102767	0.518657	0.264817		630.606	3.1158	624.26	9.13328	602.249	40.8955	630.606	3.1158	104.708
JG-WR49-110	1829.76	22696.5	1.1312	19.5896	0.616911	0.263253	1.25568	0.0377373	0.507398	0.404083		238.793	1.18946	237.285	2.65701	223.397	26.5497	238.793	1.18946	106.891
JG-WR49-111	197.887	4173.98	1.6704	12.9396	0.731478	1.88621	4.28922	0.184467	0.527747	0.12304		1091.33	5.29834	1076.25	28.4698	1046.72	85.8534	1046.72	85.8534	104.262
JG-WR49-112	237	3351.84	1.45505	17.5616	1.76841	0.285309	6.70295	0.0392084	0.429908	0.064137		247.924	1.04561	254.86	15.109	320.185	152.16	247.924	1.04561	77.4314
JG-WR49-113	835.31	1790.24	3.1523	19.4793	0.797246	0.202188	17.4948	0.0340087	0.498289	0.0284821		215.588	1.05649	186.976	29.8846	NA	NA	215.588	1.05649	NA
JG-WR49-114	342.661	16315.5	2.81277	13.9129	0.661443	1.55792	1.31683	0.159009	0.541591	0.411286		951.267	4.78988	953.642	8.14377	960.034	24.5405	960.034	24.5405	99.0867
JG-WR49-115	483.064	5442.69	1.26309	18.8835	1.01832	0.280749	3.00949	0.0404809	0.598354	0.198823		255.813	1.5007	251.251	6.69858	209.878	68.3937	255.813	1.5007	121.887
JG-WR49-116	225.405	3166.81	1.31539	18.1309	1.59711	0.289209	6.58965	0.0414854	0.448643	0.068083		262.033	1.15202	257.936	15.0111	221.893	152.197	262.033	1.15202	118.09
JG-WR49-117	268.568	6474.22	15.8962	17.7154	1.11082	0.568155	2.92347	0.0759721	0.610842	0.208944		472.036	2.78035	456.821	10.7553	381.944	64.273	472.036	2.78035	123.588
JG-WR49-118	175.686	2413.71	2.31135	16.2806	2.47889	0.329081	7.61092	0.0429904	0.446772	0.0587014		271.342	1.18712	288.864	19.1368	434.075	169.443	271.342	1.18712	62.5104
JG-WR49-119	2060.86	6592.93	2.45732	18.3482	0.644469	0.388917	3.80357	0.0538868	0.594242	0.156233		338.34	1.95871	333.578	10.8148	301.495	85.6734	338.34	1.95871	112.221
JG-WR49-120	117.792	5092.29	5.77833	13.6182	0.944612	1.61894	1.82529	0.166046	0.612177	0.335386		990.288	5.61962	977.579	11.4574	950.028	35.1867	950.028	35.1867	104.238
JG-WR49-121	319.433	3734.7	641.922	18.0387	1.53205	0.287192	2.38395	0.0403873	0.536724	0.22514		255.233	1.34313	256.347	5.40084	267.52	53.289	255.233	1.34313	95.4072
JG-WR49-122	277.82	6551.16	4.4807	16.173	0.899842	0.673885	3.45343	0.0818783	0.571319	0.165435		507.325	2.78732	523.072	14.1179	593.391	73.8411	507.325	2.78732	85.4958
JG-WR49-123	368.495	4272.31	1.94899	18.6207	1.33447	0.261898	3.35751	0.0377262	0.58427	0.174019		238.723	1.36928	236.195	7.0756	212.109	76.6358	238.723	1.36928	112.548
JG-WR49-124	134.673	1468.31	0.972753	15.8553	2.72876	0.272711	6.34519	0.0370908	0.535404	0.0843795		234.775	1.23438	244.859	13.8062	343.664	143.213	234.775	1.23438	68.3153
JG-WR49-125	78.2874	710.87	1.28018	13.053	5.13342	0.228037	16.5852	0.0293619	0.532446	0.0321037		186.554	0.979061	208.576	31.281	466.263	369.448	186.554	0.979061	40.0104
JG-WR49-126	230.371	3886.62	2.28814	17.7926	1.76932	0.293978	3.35096	0.0404928	0.495361	0.147827		255.887	1.24274	261.685	7.73028	314.923	75.3869	255.887	1.24274	81.254
JG-WR49-127	265.177	7938.39	1.49812	16.7394	0.890713	0.740463	2.56127	0.0923495	0.555228	0.216778		569.417	3.02595	562.676	11.0647	536.439	54.7191	569.417	3.02595	106.148
JG-WR49-128	359.93	15462.3	3.52347	14.6276	0.610542	1.33746	1.05728	0.143436	0.529257	0.500583		864.062	4.27987	862.128	6.14275	858.043	19.0209	864.062	4.27987	100.701
JG-WR49-129	653.417	31806.7	4.72221	13.5796	0.586756	1.7134	0.83959	0.169303	0.571033	0.680133		1008.27	5.32986	1013.56	5.38327	1025.87	12.4514	1025.87	12.4514	98.2845
JG-WR49-130	385.096	11661.6	2.43961	16.8201	0.807815	0.731581	2.27229	0.0908971	0.510125	0.224498		560.841	2.74007	557.481	9.74827	544.747	48.3965	560.841	2.74007	102.954
JG-WR49-131	389.304	4437.03	1.18325	18.8815	1.16615	0.297867	4.66301	0.0433882	0.619952	0.132951		273.8	1.66189	264.733	10.8669	186.235	107.663	273.8	1.66189	147.019
JG-WR49-132	398.965	5038.6	1.08648	18.9955	1.1283	0.279154	3.16569	0.0405991	0.602644	0.190368		256.545	1.5157	249.986	7.01497	189.905	72.3123	256.545	1.5157	135.091
JG-WR49-133	87.5832	374.538	1.78313	11.6862	4.90843	0.246282	62.2929	0.0386159	0.594074	0.00953678		244.248	1.42387	223.551	125.63	12.0108	NA	244.248	1.42387	2033.57
JG-WR49-134	744.382	30776.4	3.43762	13.2566	0.595233	1.85622	0.986313	0.179449	0.581248	0.589314		1063.96	5.70087	1065.64	6.50861	1069.98	16.006	1069.98	16.006	99.4379
JG-WR49-135	374.618	12686.5	3.85211	17.2747	0.925522	0.660471	2.1006	0.0843658	0.633783	0.301715		522.129	3.1787	514.902	8.48411	483.934	44.2489	522.129	3.1787	107.893
JG-WR49-136	222.363	981.516	1.55093	15.4599	1.72718	0.553309	18.5656	0.080618	0.618663	0.0333231		499.81	2.97531	447.162	67.2486	185.615	NA	499.81	2.97531	269.273
JG-WR49-137	696.066	5799.23	1.92127	19.555	1.14355	0.168362	3.64594	0.0250644	0.590911	0.162074		159.584	0.931421	157.997	5.33471	135.313	84.5882	159.584	0.931421	117.937
JG-WR49-138	325.311	16935.3	4.97258	13.226	0.602124	1.5859	0.923405	0.153421	0.532699	0.576886		920.109	4.56769	964.687	5.7503	1068.6	15.1412	1068.6	15.1412	86.1041
JG-WR49-139	521.714	7741.63	1.59442	19.1503	0.970534	0.320494	1.8801	0.0460673	0.546904	0.290891		290.332	1.55261	282.282	4.63338	217.123	41.6618	290.332	1.55261	133.718
JG-WR49-140	418.092	6547.34	2.41518	18.6049	0.939596	0.380812	1.81803	0.0534739	0.508699	0.279808		335.814	1.66455	327.636	5.09109	270.909	40.029	335.814	1.66455	123.958
JG-WR49-141	542.877	6491.14	1.87637	18.9125	0.954971	0.262178	4.40054	0.0374685	0.5518	0.125394		237.122	1.28467	236.421	9.28163	230.439	100.866	237.122	1.28467	102.9
JG-WR49-142	87.7089	225.118	1.57579	10.3354	5.16051	0.144495	137.439	0.0350106	0.471456	0.0034303		221.832	1.02805	137.04	177.99	NA	NA	221.832	1.02805	NA
JG-WR49-143	232.136	4097.79	2.05768	17.8724	1.43707	0.389515	5.988	0.0538293	0.667706	0.111507		337.989	2.19863	334.015	17.0456	307.425	135.639	337.989	2.19863	109.942
JG-WR49-144	248.065	4008.77	0.997564	17.9869	1.61732	0.293414	5.81061	0.0408919	0.465379	0.0800912		258.359	1.17857	261.243	13.385	288.18	132.45	258.359	1.17857	89.6521
JG-WR49-145	537.539	34256.3	5.11632	13.1403	0.58831	1.91016	0.840182	0.182557	0.573676	0.682799		1080.93	5.70902	1084.64	5.59965	1092.96	12.3048	1092.96	12.3048	98.8996
JG-WR49-146	237.637	7145.34	2.01358	17.4771	1.1539	0.618638	2.76682	0.0810997	0.541377	0.195668		502.683	2.61801	488.993	10.7378	426.303	60.5435	502.683	2.61801	117.917
JG-WR49-147	168.787	2790.21	1.9565	16.5172	1.99716	0.407137	5.53306	0.0530449	0.519236	0.0938426		333.188	1.68609	346.811	16.2568	440.049	122.628	333.188	1.68609	75.7161
JG-WR49-148	256.322	3337.01	2.06772	17.4608	1.69521	0.285706	4.31056	0.0389357	0.494235	0.114657		246.232	1.19402	255.174	9.72647	339.129	96.9983	246.232	1.19402	72.6074
JG-WR49-149	175.246	4567.06	2.72908	17.1575	1.2533	0.674485	2.23787	0.0882332	0.54342	0.242829		545.079	2.84029	523.436	9.1531	431.04	48.3834	545.079	2.84029	126.457
JG-WR49-150	69.3464	954.392	1.6003	13.3125	4.18604	0.335032	15.1658	0.0402984	0.648874	0.0427853		254.682	1.62035	293.4	38.6634	615.173	328.941	254.682	1.62035	41.4001
JG-WR49-151	243.441	2907.73	1.68955	17.6179	1.82184	0.280526	4.93212	0.0390913	0.764363	0.154977		247.198	1.85372	251.075	10.9715	288.446	111.413	247.198	1.85372	85.6999
JG-WR49-152	333.757	4442.76	1.78967	18.3738	1.53872	0.287391	3.74405	0.0405429	0.634837	0.169559		256.197	1.59454	256.503	8.4868	260.324	84.7867	256.197	1.59454	98.415
JG-WR49-153	269.214	3170.67	14.1914	17.8161	1.66151	0.28001	4.63783	0.0392098	0.471745	0.101717		247.933	1.14741	250.666	10.302	277.342	105.701	247.933	1.14741	89.3961
JG-WR49-154	238.735	3732.49	2.72717	17.7098	1.89297	0.31983	4.19821	0.0438998	0.55013	0.131039		276.961	1.49138	281.772	10.3302	322.903	94.5694	276.961	1.49138	85.7721
JG-WR49-155	506.248	14250.9	11.7615	16.6373	0.666074	0.758922	1.19146	0.0930093	0.480485	0.403275		573.31	2.63573	573.388	5.21991	574.664	23.6963	573.31	2.63573	99.7645
JG-WR49-156	332.784	19520.4	5.97334	13.2832	0.582051	1.81069	0.921634	0.175814	0.531832	0.577053		1044.07	5.12635	1049.33	6.02871	1061.18	15.1456	1061.18	15.1456	98.3873
JG-WR49-157	789.918	4355.27	2.91155	17.166	0.952454	0.561206	6.15039	0.0739572	0.84178	0.136866		459.953	3.73689	452.311	22.4525	414.602	136.265	459.953	3.73689	110.938
JG-WR49-158	662.672	13191	9.12829	16.1925	0.623752	0.603405	1.57401	0.0719777	0.451428	0.2868		448.06	1.95397	479.392	6.01464	633.156	32.4754	448.06	1.95397	70.7661
JG-WR49-159	228.216	2457.47	0.776064	17.6654	1.91295	0.241159	5.32664	0.0344632	0.530826	0.0996549		218.421	1.14001	219.369	10.5093	230.537	122.492	218.421	1.14001	94.7445
JG-WR49-160	466.856	21999.8	7.40528	13.8389	0.873098	1.56367	1.26045	0.157997	0.821262	0.651564		945.634	7.22338	955.921	7.80631	980.536	19.4571	980.536	19.4571	96.4406
JG-WR49-161	163.95	5517.08	4.51767	16.4368	1.27698	0.781926	3.20118	0.0971995	0.556399	0.173811		597.976	3.17748	586.581	14.2641	543.683	68.9107	597.976	3.17748	109.986
JG-WR49-162	99.0299	2945.23	2.34596	16.2546	2.01136	0.657892	6.11759	0.0841621	0.436869	0.071412		520.918	2.18621	513.324	24.6544	480.589	134.932	520.918	2.18621	108.392
JG-WR49-163	489.154	6663.17	1.84488	17.8489	1.21356	0.309541	4.13572	0.0416276	0.477863	0.115545		262.914	1.23109	273.826	9.92646	369.117	92.5793	262.914	1.23109	71.2277
JG-WR49-164	367.37	3748.58	1.35832	18.7792	1.4457	0.247177	3.41977	0.0362762	0.585163	0.171112		229.709	1.32051	224.28	6.88199	168.706	78.7156	229.709	1.32051	136.16
JG-WR49-165	1447.32	14959.8	1.52026	19.2835	0.586116	0.277684	1.47259	0.0395124	0.422741	0.287074		249.81	1.03585	248.818	3.24967	240.477	32.5186	249.81	1.03585	103.881
JG-WR49-166	468.787	7147.3	1.25335	18.2224	1.37161	0.297292	3.10111	0.0407389	0.602225	0.194197		257.412	1.51966	264.283	7.21607	326.653	69.0535	257.412	1.51966	78.8028
JG-WR49-167	116.589	19017.9	2.85842	4.61587	0.557116	14.2355	0.782831	0.477467	0.537673	0.686831		2516.22	11.2011	2765.53	7.42714	2953.56	9.18423	2953.56	9.18423	85.1929
JG-WR49-168	228.637	7563.09	0.716104	16.6616	1.06556	0.730183	2.73208	0.0910602	0.463879	0.169789		561.805	2.49576	556.66	11.708	536.625	58.9306	561.805	2.49576	104.692
JG-WR49-169	448.69	4218.36	2.64743	18.3375	1.2957	0.216611	2.79826	0.0307414	0.55338	0.197758		195.187	1.06393	199.085	5.05883	246.512	63.1779	195.187	1.06393	79.1794
JG-WR49-170	460.45	11719.4	1.47577	17.1733	0.790815	0.640253	1.25916	0.0814002	0.628295	0.49898		504.475	3.04874	502.463	4.99062	494.265	24.0537	504.475	3.04874	102.066
JG-WR49-171	325.275	7003.58	4.17335	17.9035	1.10272	0.443125	1.7513	0.0597115	0.668278	0.38159		373.871	2.42742	372.454	5.4603	364.609	36.4769	373.871	2.42742	102.54
JG-WR49-172	133.505	14657.4	1.75663	7.84717	0.522675	6.35199	0.801079	0.363969	0.486812	0.607696		2000.96	8.37413	2025.66	7.02777	2051.68	11.2357	2051.68	11.2357	97.5279
JG-WR49-173	1127.11	4689.43	5.18806	18.8359	0.751087	0.21712	3.59496	0.0315418	0.454835	0.12652		200.191	0.896546	199.51	6.51174	192.507	82.9501	200.191	0.896546	103.992
JG-WR49-174	519.647	6932.63	1.46376	18.8937	1.05893	0.271743	2.91441	0.0388127	0.629481	0.215989		245.47	1.51614	244.086	6.32333	231.784	65.7205	245.47	1.51614	105.904
JG-WR49-175	394.385	15713.5	3.95872	16.5547	0.902677	0.807821	1.39591	0.0985578	0.72682	0.520677		605.951	4.20352	601.231	6.33365	584.395	25.8573	605.951	4.20352	103.689
JG-WR49-176	550.14	20487.1	2.98961	16.8696	0.676089	0.740739	1.39153	0.0917832	0.479665	0.344703		566.074	2.59946	562.837	6.01257	550.741	28.5215	566.074	2.59946	102.784
JG-WR49-177	146.337	1658.09	2.2727	16.7605	2.45224	0.249704	5.84874	0.0356564	0.648947	0.110955		225.853	1.44029	226.336	11.8667	232.338	134.277	225.853	1.44029	97.2087
JG-WR49-178	357.367	9000	1.79929	17.7141	1.00073	0.576106	1.98964	0.0762788	0.5523	0.277588		473.873	2.52332	461.956	7.38464	404.081	42.8009	473.873	2.52332	117.272
JG-WR49-179	459.85	6241.75	1.58212	18.3977	1.12867	0.284171	2.25108	0.0396695	0.499844	0.222046		250.784	1.22946	253.961	5.05804	284.404	50.2026	250.784	1.22946	88.179
JG-WR49-180	253.373	3409.16	1.02038	17.9544	1.72661	0.266383	5.63444	0.0376292	0.502511	0.0891857		238.121	1.17475	239.798	12.0349	257.248	129.051	238.121	1.17475	92.5646
JG-WR49-181	614.784	11226	1.88606	18.5851	0.932338	0.400507	2.10974	0.0553813	0.598534	0.2837		347.475	2.0247	342.016	6.12618	306.064	46.0712	347.475	2.0247	113.53
JG-WR49-182	97.0898	1785.45	1.41575	16.3078	2.62209	0.374014	7.03278	0.0511068	0.572877	0.0814581		321.313	1.79561	322.624	19.4405	333.092	159.099	321.313	1.79561	96.4638
JG-WR49-183	48.3455	579.055	1.75108	11.0234	5.19311	0.384544	22.0598	0.0424097	0.520146	0.0235789		267.752	1.36418	330.376	62.2897	799.723	467.453	267.752	1.36418	33.4806
JG-WR49-184	70.2909	1141.22	1.76939	12.6923	4.36109	0.414215	10.603	0.0454579	0.561649	0.0529707		286.575	1.57429	351.906	31.5434	810.017	222.058	286.575	1.57429	35.3789
JG-WR49-185	224.361	3288.24	2.17873	17.3257	1.98999	0.313202	5.93151	0.042703	0.460793	0.0776856		269.566	1.21653	276.66	14.3654	338.056	134.066	269.566	1.21653	79.74
JG-WR49-186	550.886	7112.01	1.4278	19.2303	1.01028	0.271381	3.19281	0.0394713	0.486227	0.152288		249.555	1.19022	243.797	6.92013	189.705	73.4239	249.555	1.19022	131.549
JG-WR49-187	560.31	8716.16	1.8363	18.7473	0.987986	0.321882	2.15543	0.0452256	0.432282	0.200555		285.142	1.20575	283.349	5.32932	269.554	48.4274	285.142	1.20575	105.783
JG-WR49-188	121.496	1777.12	1.30309	15.0416	3.45245	0.319092	6.75317	0.0397253	0.542053	0.0802664		251.13	1.33508	281.204	16.5889	540.395	147.364	251.13	1.33508	46.4716
JG-WR49-189	401.021	5870.82	1.52674	18.5565	1.36333	0.293354	3.90229	0.0414321	0.467392	0.119774		261.704	1.19869	261.196	8.98744	257.647	89.0737	261.704	1.19869	101.575
JG-WR49-190	111.072	1528.19	2.45818	14.9845	3.19311	0.30503	12.9052	0.0387001	0.466817	0.0361729		244.771	1.12121	270.321	30.6371	498.835	285.101	244.771	1.12121	49.0685
JG-WR49-191	569.649	6107.22	1.35809	19.4921	1.13071	0.198851	5.05887	0.0294926	0.512094	0.101227		187.372	0.94571	184.153	8.52032	144.091	118.124	187.372	0.94571	130.037
JG-WR49-192	1231.85	14549.4	2.10253	19.1099	0.693813	0.29843	1.19766	0.0421422	0.531261	0.443581		266.098	1.38489	265.173	2.79505	258.037	24.6661	266.098	1.38489	103.124
JG-WR49-193	887.717	22991.3	2.26475	17.6946	0.744817	0.57461	1.23555	0.074521	0.691478	0.559654		463.336	3.09144	460.992	4.57817	450.272	22.7529	463.336	3.09144	102.901
JG-WR49-194	319.03	13143.2	2.98424	14.64	0.682767	1.06866	1.09524	0.115225	0.477329	0.43582		703.024	3.17923	738.085	5.74508	846.883	20.5183	703.024	3.17923	83.0131
JG-WR49-195	287.619	3610.13	0.881846	18.0574	1.74772	0.284824	3.41038	0.0402241	0.547988	0.160682		254.222	1.36599	254.477	7.67669	257.814	77.3844	254.222	1.36599	98.6069
JG-WR49-196	248.503	7546.8	3.10671	16.9633	1.07322	0.675172	2.47489	0.0856606	0.578131	0.233599		529.822	2.94057	523.852	10.1287	498.853	53.0294	529.822	2.94057	106.208
JG-WR49-197	1167.05	14008.6	1.38406	19.364	0.707559	0.268885	1.18799	0.0384058	0.5367	0.451772		242.944	1.27962	241.801	2.55616	231.704	24.4782	242.944	1.27962	104.851
JG-WR49-198	143.414	177.909	1.38537	9.57829	6.43677	0.0384396	451.977	0.0150881	0.509642	0.00112758		96.5374	0.48833	38.2994	171.493	NA	NA	96.5374	0.48833	NA
JG-WR49-199	318.58	4167.63	1.96867	18.1644	1.38559	0.275109	3.23512	0.0385779	0.60155	0.185943		244.012	1.44042	246.771	7.08738	274.065	72.8411	244.012	1.44042	89.0342
JG-WR49-200	75.4491	2545.03	2.31441	15.568	2.10516	0.755591	5.21529	0.0932833	0.526294	0.100914		574.926	2.89479	571.463	22.7953	558.662	113.213	574.926	2.89479	102.911
JG-WR49-201	263.649	4029.37	1.90756	17.9729	1.51467	0.305006	5.71349	0.0424331	0.451766	0.07907		267.897	1.18546	270.303	13.5598	292.188	130.17	267.897	1.18546	91.6863
JG-WR49-202	766.001	13899.3	3.38281	17.6735	0.74813	0.392176	1.67861	0.0510549	0.603554	0.359555		320.995	1.88993	335.958	4.80144	441.824	34.8583	320.995	1.88993	72.6522
JG-WR49-203	197.722	2532.96	1.87409	16.6647	2.21419	0.293796	4.11869	0.0391603	0.432473	0.105003		247.626	1.05061	261.543	9.49688	389.117	92.0041	247.626	1.05061	63.6379
JG-WR49-204	913.906	22301.3	3.17557	17.1039	0.521865	0.669304	0.931593	0.0836929	0.410579	0.440728		518.128	2.04408	520.289	3.79268	530.766	18.3198	518.128	2.04408	97.6189
JG-WR49-205	374.578	13747.3	1.90027	16.1182	0.649428	0.897967	1.66891	0.106441	0.477974	0.286399		652.045	2.96417	650.641	8.01757	646.729	34.3524	652.045	2.96417	100.822
JG-WR49-206	272.869	2767.1	1.6216	17.2852	1.52905	0.273249	4.03487	0.0375042	0.535177	0.132638		237.344	1.24711	245.288	8.79258	323.021	90.8435	237.344	1.24711	73.4766
JG-WR49-207	2632.38	56184.7	9.14912	17.8519	0.533996	0.530111	0.795081	0.068444	0.50677	0.637382		426.774	2.09273	431.883	2.79696	460.192	13.5843	426.774	2.09273	92.7383
JG-WR49-208	404.993	11160.9	19.7181	17.3668	0.778026	0.663043	1.93728	0.0848156	0.448655	0.23159		524.803	2.26126	516.474	7.84277	480.732	41.6419	524.803	2.26126	109.167
JG-WR49-209	391.179	4500.81	1.46491	18.8061	1.22152	0.259745	3.0767	0.0374654	0.468761	0.152358		237.103	1.09126	234.461	6.44147	209.062	70.534	237.103	1.09126	113.413
JG-WR49-210	1112.09	10724.2	3.70008	19.657	0.867416	0.191139	2.54234	0.0277974	0.52834	0.207817		176.748	0.921148	177.6	4.1424	189.991	57.887	176.748	0.921148	93.0299
JG-WR49-211	331.68	9959.8	4.30008	16.048	0.836167	0.891712	1.78888	0.105476	0.569222	0.318201		646.421	3.5011	647.289	8.5623	651.229	36.4069	646.421	3.5011	99.2618
JG-WR49-212	110.667	1689.76	1.44714	15.6017	3.14684	0.319696	13.3373	0.0414033	0.705924	0.0529287		261.525	1.80922	281.668	32.8179	453.38	296.827	261.525	1.80922	57.6835
JG-WR49-213	506.791	22319.4	4.09751	13.3585	0.501358	1.76853	0.839242	0.171897	0.468965	0.558796		1022.55	4.43443	1033.98	5.44358	1059.13	14.0087	1059.13	14.0087	96.5466
JG-WR49-214	466.812	25159.6	2.94749	13.3415	0.549644	1.74389	0.858473	0.16912	0.501145	0.583763		1007.26	4.67324	1024.9	5.54005	1063.66	14.0184	1063.66	14.0184	94.6979
JG-WR49-215	92.3358	9342.27	1.82815	9.39945	0.654731	4.35383	1.26734	0.299339	0.514843	0.40624		1688.03	7.64601	1703.62	10.4651	1723.63	21.2688	1723.63	21.2688	97.9346
JG-WR49-216	227.958	15331.7	0.961125	11.3205	0.643464	2.75771	0.869044	0.227566	0.54089	0.622397		1321.73	6.46382	1344.17	6.47594	1380.91	13.0698	1380.91	13.0698	95.7145
JG-WR49-217	142.62	5891.18	2.42815	15.2626	1.13648	1.09886	2.75663	0.126088	0.498335	0.180777		765.51	3.59701	752.8	14.6554	716.119	57.5723	765.51	3.59701	106.897
JG-WR49-218	184.228	12133.5	2.69819	11.502	0.748607	2.5419	1.14414	0.214441	0.664529	0.580813		1252.44	7.56422	1284.12	8.33757	1338.34	18.0026	1338.34	18.0026	93.581
JG-WR49-219	903.456	56281.2	6.8936	13.599	0.577538	1.55661	0.801322	0.153728	0.545317	0.680522		921.827	4.684	953.122	4.954	1026.95	11.8757	1026.95	11.8757	89.7637
JG-WR49-220	310.036	11205.3	3.10002	16.051	0.768009	0.914756	2.07317	0.108509	0.588898	0.284057		664.082	3.71607	659.583	10.0571	645.185	42.7365	664.082	3.71607	102.929
JG-WR49-221	195.103	2645.89	1.63578	17.1902	2.24074	0.291507	8.84673	0.0400782	0.485758	0.0549082		253.318	1.20665	259.745	20.2779	319.116	201.114	253.318	1.20665	79.381
JG-WR49-222	217.777	6830.64	1.97822	16.9704	1.3175	0.647655	3.15645	0.0829749	0.719068	0.227809		513.855	3.55154	507.035	12.5988	477.327	67.9586	513.855	3.55154	107.653
JG-WR49-223	120.757	1504.68	1.85642	14.9193	3.02988	0.300221	12.8576	0.0379466	0.53235	0.0414035		240.092	1.25462	266.573	30.1538	507.139	283.576	240.092	1.25462	47.3425
JG-WR49-224	571.301	11086.2	4.00243	18.2824	0.789029	0.434178	2.38241	0.0589644	0.51508	0.216201		369.324	1.84885	366.139	7.3235	346.992	52.614	369.324	1.84885	106.436
JG-WR49-225	669.896	28830.5	2.80737	15.5559	0.736854	1.04254	1.06909	0.118039	0.69412	0.649264		719.268	4.72413	725.18	5.54077	744.405	17.1906	719.268	4.72413	96.6232
JG-WR49-226	175.007	4466.99	1.72715	17.2879	1.57968	0.633524	6.13211	0.0838259	0.542755	0.0885103		518.919	2.70608	498.289	24.1524	405.558	136.848	518.919	2.70608	127.952
JG-WR49-227	331.084	18605.9	1.97752	12.9397	0.609222	1.97141	1.13935	0.186061	0.539302	0.473342		1100	5.45378	1105.79	7.67555	1118.08	20.0431	1118.08	20.0431	98.3825
JG-WR49-228	101.305	5149.88	3.47001	13.3624	1.03753	1.71188	2.45641	0.171543	0.513767	0.209153		1020.6	4.84951	1012.99	15.746	997.429	48.8083	997.429	48.8083	102.324
JG-WR49-229	496.983	3288.53	2.98665	17.6959	1.88393	0.1205	5.4749	0.0167199	0.663428	0.121176		106.892	0.703305	115.526	5.97843	298.216	124.062	106.892	0.703305	35.8438
JG-WR49-230	155.104	2369.61	0.904807	17.0455	2.24102	0.356893	7.6736	0.0491036	0.548567	0.0714875		309.016	1.65517	309.893	20.4966	317.463	174.224	309.016	1.65517	97.3392
JG-WR49-231	281.768	4035.51	1.19359	18.2388	1.76123	0.266822	3.93552	0.0376409	0.6527	0.165849		238.194	1.52632	240.15	8.41681	260.342	89.1742	238.194	1.52632	91.4925
JG-WR49-232	478.201	4890.13	1.56626	18.7183	1.24106	0.256511	2.52069	0.0367405	0.514579	0.204142		232.598	1.17556	231.851	5.22507	225.28	57.0705	232.598	1.17556	103.248
JG-WR49-233	150.594	8510.42	2.31812	13.8551	0.886528	1.57205	1.21347	0.161044	0.575262	0.474065		962.574	5.14374	959.236	7.531	952.469	21.8667	952.469	21.8667	101.061
JG-WR49-234	902.579	5009.72	1.00865	13.0031	0.544737	1.47268	2.98993	0.143595	0.500229	0.167304		864.959	4.04906	919.229	18.0833	1052.75	59.4012	1052.75	59.4012	82.1621
JG-WR49-235	227.289	2768.48	1.17259	18.15	1.50931	0.290688	8.94698	0.0421405	0.760499	0.0850006		266.087	1.9824	259.101	20.4631	197.357	NA	266.087	1.9824	134.826
JG-WR49-236	377.172	23908	6.75501	13.4355	0.635382	1.72178	1.00143	0.168226	0.569647	0.568831		1002.33	5.28799	1016.69	6.43253	1048.63	16.6227	1048.63	16.6227	95.5846
JG-WR49-237	277.459	3520.9	1.82057	18.1042	1.57813	0.274641	3.19733	0.0387958	0.482555	0.150924		245.364	1.16177	246.397	6.99523	257.247	72.6784	245.364	1.16177	95.3809
JG-WR49-238	229.342	2741.87	2.52028	17.576	1.75918	0.27182	10.4394	0.0380404	0.443867	0.0425186		240.675	1.04858	244.148	22.6585	278.693	239.34	240.675	1.04858	86.3582
JG-WR49-239	213.463	3300.63	5.26822	17.8117	1.83196	0.366773	3.85889	0.0511736	0.690365	0.178902		321.723	2.16655	317.259	10.515	285.61	86.8207	321.723	2.16655	112.644
JG-WR49-240	692.557	8536.54	1.52835	19.356	0.826727	0.267263	1.54143	0.0386263	0.460048	0.298456		244.312	1.10292	240.503	3.30086	204.502	34.1404	244.312	1.10292	119.467
JG-WR49-241	241.208	3076.91	2.19472	17.7186	1.66292	0.273838	9.36755	0.0382508	0.438996	0.0468635		241.981	1.0426	245.757	20.45	282.994	214.454	241.981	1.0426	85.5075
JG-WR49-242	234.522	7751.98	2.52452	15.7799	0.884158	0.937	1.72157	0.109957	0.581812	0.337955		672.496	3.71549	671.311	8.45618	668.286	34.6859	672.496	3.71549	100.63
JG-WR49-243	267.385	2133.23	1.98689	17.5998	1.9398	0.259012	7.33953	0.0374419	0.528969	0.0720713		236.957	1.23067	233.87	15.3328	203.951	170.072	236.957	1.23067	116.183
JG-WR49-244	225.778	2334.57	1.11877	16.8577	2.12958	0.24298	7.36092	0.03306	0.4814	0.0653994		209.671	0.993118	220.858	14.6116	342.8	166.441	209.671	0.993118	61.1642
JG-WR49-245	297.479	8060.75	3.03715	17.8229	1.01753	0.560268	1.97979	0.0744095	0.499979	0.252541		462.667	2.23218	451.701	7.2186	397.214	42.9438	462.667	2.23218	116.478
JG-WR49-246	368.645	3374.44	4.36668	18.2757	1.6311	0.183437	3.62804	0.0262467	0.519249	0.143121		167.015	0.856084	171.014	5.71017	227.727	82.9719	167.015	0.856084	73.34
JG-WR49-247	232.724	2940.08	2.32627	16.6877	2.46944	0.270629	8.57761	0.0354848	0.571568	0.0666349		224.785	1.26266	243.197	18.5524	425.867	191.189	224.785	1.26266	52.7829
JG-WR49-248	167.096	2286.21	2.44973	17.2013	2.15509	0.354539	4.70337	0.0493904	0.535557	0.113867		310.778	1.62491	308.129	12.5007	289.142	106.828	310.778	1.62491	107.483
JG-WR49-249	676.398	8331.08	2.26105	18.7587	0.956191	0.309397	1.63394	0.0432505	0.567068	0.347057		272.95	1.5155	273.714	3.92024	281.269	35.0598	272.95	1.5155	97.0424
JG-WR49-250	1459.68	20433.9	3.26648	19.2649	0.61664	0.30733	0.904615	0.0432655	0.509063	0.56274		273.043	1.36093	272.109	2.15931	265.077	17.1674	273.043	1.36093	103.005
JG-WR49-251	1438.68	2986.13	4.87428	18.8693	0.750444	0.219616	1.40679	0.0329287	0.472375	0.335782		208.852	0.970755	201.59	2.57217	118.5	31.2238	208.852	0.970755	176.247
JG-WR49-252	298.405	11414.9	3.9267	13.9785	0.780202	1.49092	1.66753	0.152863	0.512428	0.307298		916.99	4.38001	926.691	10.1347	950.732	32.4724	950.732	32.4724	96.451
JG-WR49-253	85.355	1430.68	0.873622	13.4345	4.29285	0.37719	9.3487	0.0422389	0.529005	0.0565859		266.696	1.38205	324.968	26.0041	767.637	196.977	266.696	1.38205	34.7425
JG-WR49-254	640.186	2330.67	5.32063	18.2231	0.927549	0.3043	2.68375	0.045156	0.487612	0.181691		284.713	1.35809	269.753	6.35773	142.853	61.9645	284.713	1.35809	199.306
JG-WR49-255	202.356	1947.32	1.45224	15.7721	2.61081	0.257992	6.22894	0.0332714	0.552433	0.0886881		210.99	1.14671	233.048	12.9717	462.784	137.605	210.99	1.14671	45.5915
JG-WR49-256	293.341	4267.97	2.13378	17.8666	1.41558	0.302904	3.5329	0.0415711	0.518885	0.146872		262.564	1.33503	268.666	8.33994	323.2	79.3778	262.564	1.33503	81.2389
JG-WR49-257	854.494	9708.9	1.73612	19.6437	0.861174	0.250068	1.80512	0.0365068	0.522728	0.289581		231.144	1.18685	226.631	3.66659	181.051	40.2424	231.144	1.18685	127.668
JG-WR49-258	729.077	8021.96	0.867321	19.0701	0.888751	0.231773	2.08082	0.0330235	0.479569	0.230471		209.443	0.988284	211.661	3.97557	237.4	46.6977	209.443	0.988284	88.2239
JG-WR49-259	155.701	2164.42	2.43302	16.2534	2.3806	0.318483	4.96054	0.0418972	0.656029	0.13225		264.582	1.7006	280.735	12.1672	418.516	109.883	264.582	1.7006	63.2191
JG-WR49-260	282.278	8787.42	4.18374	17.4791	1.03715	0.573839	2.33659	0.0744	0.666089	0.285069		462.61	2.97343	460.494	8.65072	450.899	49.7645	462.61	2.97343	102.597
JG-WR49-261	128.92	2080.06	0.841187	15.5613	2.84799	0.324605	7.98706	0.0408285	0.545515	0.0682999		257.967	1.37946	285.439	19.8765	517.88	175.184	257.967	1.37946	49.812
JG-WR49-262	263.052	3906.4	1.82229	18.1024	1.33912	0.304772	2.60374	0.0426343	0.478515	0.18378		269.141	1.26137	270.121	6.17551	279.637	58.5925	269.141	1.26137	96.2467
JG-WR49-263	99.4208	2995.39	3.04874	16.2041	2.23751	0.707997	6.67065	0.0896856	0.505963	0.0758491		553.677	2.68447	543.556	28.0836	502.287	146.576	553.677	2.68447	110.231
JG-WR49-264	237.698	5313.49	2.0105	17.7227	1.56902	0.371491	3.3657	0.0499208	0.522404	0.155214		314.035	1.60121	320.758	9.25705	370.824	74.8993	314.035	1.60121	84.6857
JG-WR49-265	154.713	1706.01	0.995791	16.1937	2.62798	0.278885	15.7055	0.0377754	0.565044	0.0359775		239.029	1.32589	249.773	34.7892	352.947	356.535	239.029	1.32589	67.7238
JG-WR49-266	976.615	11141.2	1.77322	19.4259	0.831438	0.227623	2.15233	0.0326862	0.496478	0.23067		207.339	1.01301	208.235	4.05223	219.42	48.4681	207.339	1.01301	94.4938
JG-WR49-267	946.742	18145.8	4.55932	16.2402	0.576441	0.795904	1.17795	0.0943206	0.514405	0.436694		581.039	2.85815	594.515	5.30077	647.233	22.7762	581.039	2.85815	89.7729
JG-WR49-268	192.874	2639.06	2.0169	17.1648	2.01997	0.282925	7.80475	0.0386602	0.486395	0.0623204		244.523	1.16707	252.975	17.4784	333.062	176.838	244.523	1.16707	73.4167
JG-WR49-269	999.301	14022.6	2.4898	19.0676	0.702936	0.296081	2.17869	0.0414458	0.472181	0.216727		261.789	1.21135	263.335	5.05368	278.129	48.7182	261.789	1.21135	94.1248
JG-WR49-270	572.594	16146.1	3.64115	17.2786	0.725515	0.664948	1.01943	0.0839538	0.487453	0.478164		519.68	2.43378	517.636	4.13404	509.589	19.692	519.68	2.43378	101.98
JG-WR49-271	678.558	13669.6	3.08862	17.9413	0.666447	0.51188	0.947677	0.0673521	0.453518	0.478558		420.183	1.84483	419.713	3.25794	418.078	18.5855	420.183	1.84483	100.504
JG-WR49-272	296.204	4582.29	1.4939	18.1697	1.24092	0.331298	4.40143	0.045972	0.471894	0.107214		289.744	1.33701	290.556	11.122	298.071	99.8753	289.744	1.33701	97.2066
JG-WR49-273	310.119	3515.12	1.11391	18.4263	1.64718	0.264348	4.42561	0.0379618	0.512738	0.115857		240.187	1.20887	238.165	9.39562	219.254	101.765	240.187	1.20887	109.547
JG-WR49-274	278.347	6930.91	3.24896	17.5635	1.18576	0.575737	2.4936	0.0756466	0.629756	0.252549		470.085	2.85503	461.718	9.25142	421.252	53.8762	470.085	2.85503	111.592
JG-WR49-275	960.26	12177.5	0.656944	19.4419	0.776175	0.267731	2.5351	0.038394	0.526015	0.207493		242.871	1.25377	240.878	5.43626	222.523	57.3848	242.871	1.25377	109.144
JG-WR49-276	161.193	2309.41	1.2073	16.8504	2.32577	0.279432	11.0187	0.0379709	0.858978	0.0779564		240.243	2.02566	250.207	24.4401	345.677	249.148	240.243	2.02566	69.4994
JG-WR49-277	912.914	11560.2	16.0451	18.5677	0.828496	0.353829	1.50122	0.048462	0.603598	0.402072		305.073	1.79852	307.597	3.98387	327.787	31.1946	305.073	1.79852	93.0705
JG-WR49-278	186.547	2338.79	1.53246	16.6815	2.43679	0.30745	7.22076	0.0412438	0.574184	0.0795184		260.538	1.46614	272.203	17.2427	374.71	162.183	260.538	1.46614	69.5306
JG-WR49-279	312.496	8420.18	2.42668	16.7718	0.980236	0.67579	2.31955	0.084231	0.567108	0.24449		521.328	2.8401	524.227	9.49815	537.806	49.2145	521.328	2.8401	96.9361
JG-WR49-280	327.442	4098.45	1.12987	17.9155	1.67705	0.260959	3.07829	0.0360479	0.476142	0.154677		228.29	1.06796	235.439	6.46869	308.424	69.2625	228.29	1.06796	74.0181
JG-WR49-281	507.487	6243.02	1.36305	18.8923	1.07631	0.246876	2.58411	0.0352239	0.486942	0.188437		223.16	1.06807	224.035	5.19517	234.259	58.5767	223.16	1.06807	95.2622
JG-WR49-282	98.7412	1033.97	1.07776	13.8072	4.31716	0.242346	21.114	0.0300667	0.492216	0.0233123		190.965	0.926177	220.34	41.8446	547.972	465.783	190.965	0.926177	34.8495
JG-WR49-283	203.107	2413.14	1.96134	16.2734	2.62294	0.251499	10.9197	0.0328516	0.573022	0.0524759		208.371	1.17492	227.793	22.2852	434.324	243.52	208.371	1.17492	47.976
JG-WR49-284	177.787	5386.36	2.56101	16.6313	1.36721	0.722225	3.83307	0.091058	0.489826	0.12779		561.791	2.6353	551.98	16.3229	512.635	83.5818	561.791	2.6353	109.589
JG-WR49-285	254.222	3511.49	1.15321	17.963	1.76862	0.310652	6.64522	0.0436771	0.491688	0.0739913		275.585	1.32647	274.686	15.9942	268.012	152.14	275.585	1.32647	102.826
JG-WR49-286	714.828	9533.38	0.779536	18.5869	0.742108	0.37486	1.2723	0.0519278	0.476842	0.374787		326.346	1.51742	323.249	3.52235	301.983	26.905	326.346	1.51742	108.068
JG-WR49-287	558.813	4476.84	2.61643	18.3454	1.62892	0.155208	4.99677	0.0219351	0.473369	0.094735		139.874	0.65499	146.5	6.81676	256.129	114.385	139.874	0.65499	54.6109
JG-WR49-288	391.086	5224.83	1.37893	18.3214	1.20422	0.27212	2.12554	0.0380528	0.524367	0.246699		240.752	1.23914	244.388	4.61673	280.475	47.1342	240.752	1.23914	85.837
JG-WR49-289	506.005	9949.98	5.39504	15.8689	0.627923	0.899435	1.05822	0.105776	0.518433	0.489909		648.172	3.19692	651.426	5.08811	663.627	19.7628	648.172	3.19692	97.671
JG-WR49-290	137.406	1664.37	1.07135	15.3422	3.1717	0.299454	12.2101	0.0383924	0.588364	0.0481868		242.86	1.40232	265.974	28.578	475.782	270.575	242.86	1.40232	51.0444
JG-AW55
JG-AW55-1	269.738	1117.13	1.06881	14.7401	3.51376	0.140951	15.2176	0.0185852	0.631624	0.0415061		118.708	0.74293	133.89	19.091	413.357	341.609	118.708	0.74293	28.7182
JG-AW55-2	356.899	10315.9	6.67215	14.8644	0.82487	1.17182	1.38716	0.128414	0.516607	0.372421		778.81	3.78985	787.497	7.59978	813.111	26.9191	778.81	3.78985	95.7815
JG-AW55-3	491.626	35211.4	1.58748	7.58218	0.517792	6.97694	0.742312	0.38191	0.526264	0.708953		2085.2	9.37569	2108.5	6.59251	2132.05	9.16229	2132.05	9.16229	97.8023
JG-AW55-4	535.416	7998.62	1.75064	17.5636	0.985091	0.53918	1.73287	0.0704282	0.542148	0.312862		438.735	2.29946	437.884	6.16375	434.36	36.6683	438.735	2.29946	101.007
JG-AW55-5	499.158	2478.75	1.32736	17.9357	1.67677	0.28625	8.47728	0.0413565	0.752367	0.088751		261.236	1.92616	255.604	19.1584	205.283	196.177	261.236	1.92616	127.256
JG-AW55-6	1982.14	5276.74	0.896092	19.4331	0.858929	0.161501	4.19347	0.0238896	0.435517	0.103856		152.192	0.655057	152.016	5.92058	150.3	97.7775	152.192	0.655057	101.258
JG-AW55-7	618.297	2815.97	1.38733	17.0264	2.55378	0.152832	6.24911	0.0205526	0.478097	0.0765064		131.148	0.620678	144.41	8.41215	369.17	140.497	131.148	0.620678	35.525
JG-AW55-8	552.192	4192.68	1.83895	18.1798	1.37136	0.26477	2.67716	0.0369448	0.461086	0.172229		233.867	1.059	238.504	5.69071	285.391	60.2887	233.867	1.059	81.9462
JG-AW55-9	688.724	23517	1.8013	14.2916	0.557825	1.41965	0.794368	0.147102	0.491112	0.618243		884.696	4.05989	897.216	4.73242	929.098	12.8188	929.098	12.8188	95.221
JG-AW55-10	119.386	799.082	0.908585	12.749	5.15272	0.258335	26.8567	0.0308007	0.470673	0.0175254		195.558	0.906616	233.325	56.0415	634.203	587.906	195.558	0.906616	30.8352
JG-AW55-11	299.434	1272.93	2.33399	15.2971	3.42785	0.149515	16.0648	0.0198507	0.503095	0.0313166		126.712	0.631259	141.484	21.2197	397.949	361.972	126.712	0.631259	31.8413
JG-AW55-12	766.016	8200.07	2.37896	18.8508	0.963546	0.285836	1.5943	0.0399671	0.499467	0.313283		252.629	1.23739	255.276	3.59859	280.683	34.6502	252.629	1.23739	90.005
JG-AW55-13	253.654	1431.07	1.53913	15.6573	2.8519	0.219549	9.60662	0.029334	0.501922	0.0522475		186.379	0.922081	201.534	17.5621	383.741	216.004	186.379	0.922081	48.5688
JG-AW55-14	1382.53	47430.6	3.8724	13.8676	0.62026	1.57507	0.909428	0.157209	0.622257	0.684229		941.245	5.44945	960.426	5.64824	1005.47	13.4475	1005.47	13.4475	93.6124
JG-AW55-15	803.263	3356.78	1.29995	17.9362	2.01065	0.134543	3.98251	0.0187689	0.556437	0.13972		119.871	0.660843	128.172	4.79545	285.959	90.1931	119.871	0.660843	41.9189
JG-AW55-16	674.429	4954.69	1.57079	18.7811	1.1641	0.311241	4.06702	0.0444902	0.66714	0.164037		280.606	1.83187	275.142	9.80241	229.912	92.6906	280.606	1.83187	122.049
JG-AW55-17	199.48	1802.62	1.55605	15.7644	2.94853	0.325893	9.60573	0.0422077	0.481924	0.0501704		266.503	1.25815	286.426	23.9777	453.286	213.419	266.503	1.25815	58.7936
JG-AW55-18	1435.81	5456.25	1.95254	18.9401	1.35975	0.121844	4.108	0.0174304	0.498472	0.121342		111.396	0.550507	116.742	4.53038	228.169	94.2542	111.396	0.550507	48.8216
JG-AW55-19	521.014	2747.99	0.796604	18.0087	1.60582	0.267656	5.00012	0.0382273	0.621594	0.124316		241.836	1.47539	240.818	10.7202	231.892	114.608	241.836	1.47539	104.288
JG-AW55-20	863.594	7233.95	1.33951	19.1128	1.01922	0.278512	1.77099	0.0396931	0.70502	0.398095		250.93	1.73512	249.477	3.9173	236.83	37.4567	250.93	1.73512	105.954
JG-AW55-21	638.212	11858.2	17.6532	16.7274	0.754729	0.702455	1.64328	0.0861746	0.457001	0.278102		532.873	2.3373	540.256	6.88481	572.484	34.3203	532.873	2.3373	93.0809
JG-AW55-22	1124.09	27852.7	3.23233	16.5127	0.541596	0.814849	0.847513	0.0975278	0.453099	0.534622		599.905	2.59552	605.17	3.8638	625.857	15.4606	599.905	2.59552	95.8533
JG-AW55-23	249.112	6678.65	6.47612	15.7441	1.30215	0.943637	2.36459	0.110526	0.749538	0.316985		675.801	4.80892	674.784	11.6572	672.342	47.9809	675.801	4.80892	100.515
JG-AW55-24	130.008	1131.27	1.25439	14.5694	3.54578	0.292666	14.162	0.0377278	0.479272	0.0338421		238.733	1.12325	260.656	32.5679	463.682	315.029	238.733	1.12325	51.4865
JG-AW55-25	655.203	3931.29	2.05199	18.6175	1.47002	0.190154	4.88027	0.0273436	0.47949	0.0982508		173.901	0.822692	176.76	7.91742	216.207	112.508	173.901	0.822692	80.4325
JG-AW55-26	763.706	5098.84	0.948184	18.5492	1.28446	0.202466	3.49238	0.0285197	0.529163	0.151519		181.277	0.945887	187.211	5.97085	263.72	79.27	181.277	0.945887	68.7383
JG-AW55-27	115.185	1047.53	1.95486	12.8802	3.45432	0.358175	20.3289	0.0404301	0.526852	0.0259164		255.499	1.31977	310.851	54.4878	750.845	433.352	255.499	1.31977	34.0281
JG-AW55-28	511.044	5259.26	2.21165	18.6848	1.22019	0.304077	1.9501	0.0432075	0.529368	0.271457		272.684	1.4134	269.58	4.61711	243.691	43.2279	272.684	1.4134	111.897
JG-AW55-29	881.748	29258.5	5.26276	13.9629	0.522744	1.4056	0.766145	0.142443	0.460047	0.60047		858.463	3.69766	891.303	4.54551	974.553	12.4809	974.553	12.4809	88.0879
JG-AW55-30	1314.81	5325.27	1.2329	19.2678	1.27253	0.126069	3.78115	0.018514	0.658721	0.174212		118.258	0.771885	120.559	4.29833	167.209	87.0342	118.258	0.771885	70.7244
JG-AW55-31	1101.99	12562.9	3.31091	18.5754	0.755256	0.423394	2.23011	0.0580587	0.567309	0.254386		363.808	2.00676	358.475	6.73569	325.075	48.9509	363.808	2.00676	111.915
JG-AW55-32	45.8895	893.994	1.4305	12.9441	4.31954	0.728415	11.2545	0.0861347	0.605285	0.0537816		532.636	3.09437	555.623	48.1962	651.909	241.919	532.636	3.09437	81.7041
JG-AW55-33	1737.33	8167.01	1.5245	17.9336	0.689884	0.453614	1.66227	0.0607009	0.591588	0.355892		379.887	2.18243	379.807	5.26711	380.275	34.9184	379.887	2.18243	99.8978
JG-AW55-34	189.536	6221.5	1.95767	13.2303	1.09249	1.75607	2.28508	0.173039	0.54417	0.23814		1028.83	5.17468	1029.4	14.7847	1031.47	44.8809	1031.47	44.8809	99.7443
JG-AW55-35	332.416	1756.78	0.938671	16.5933	2.4104	0.199491	10.1689	0.0277259	0.497363	0.0489102		176.3	0.864969	184.695	17.174	294.456	232.379	176.3	0.864969	59.8731
JG-AW55-36	619.534	12052.4	0.873823	17.0944	0.76049	0.684118	1.71662	0.086236	0.510027	0.297111		533.238	2.61021	529.26	7.0806	513.113	36.0368	533.238	2.61021	103.922
JG-AW55-37	681.794	4606.08	1.10776	18.2447	1.20978	0.265525	2.8833	0.0371436	0.648129	0.224787		235.103	1.49632	239.109	6.1427	279.668	64.307	235.103	1.49632	84.0651
JG-AW55-38	404.241	3701.23	0.915058	18.0118	1.4098	0.356166	2.82104	0.0498881	0.608456	0.215685		313.835	1.86381	309.348	7.52293	276.683	63.097	313.835	1.86381	113.428
JG-AW55-39	1074.93	1285.92	0.697164	17.6374	1.79249	0.207354	16.7208	0.0331297	0.564067	0.0337344		210.106	1.16604	191.33	29.1666	NA	NA	210.106	1.16604	NA
JG-AW55-40	517.145	5272.25	1.27727	18.5583	1.35626	0.31204	3.00862	0.0440365	0.446639	0.148453		277.805	1.21443	275.761	7.26556	259.434	68.3568	277.805	1.21443	107.081
JG-AW55-41	1256.18	8947.53	1.98835	19.5074	0.927656	0.240933	1.68154	0.0349755	0.56018	0.333135		221.613	1.22034	219.184	3.31503	194.21	36.8526	221.613	1.22034	114.11
JG-AW55-42	523.861	3146.2	1.1076	18.1406	1.557	0.245521	4.20286	0.0350498	0.672941	0.160115		222.076	1.46899	222.932	8.41245	232.954	95.7843	222.076	1.46899	95.3304
JG-AW55-43	369.579	2353.15	0.879309	17.4676	1.68341	0.241072	5.43602	0.0340403	0.581306	0.106936		215.786	1.23362	219.298	10.722	258.172	124.274	215.786	1.23362	83.5822
JG-AW55-44	459.824	3469.31	1.10846	18.1454	1.60438	0.269267	4.2904	0.0381201	0.546596	0.1274		241.17	1.29387	242.108	9.24209	252.236	97.9277	241.17	1.29387	95.613
JG-AW55-45	547.96	5739.57	1.5354	18.6196	1.29327	0.298671	3.06345	0.0420367	0.511249	0.166886		265.445	1.32952	265.362	7.1539	265.636	69.3229	265.445	1.32952	99.9282
JG-AW55-46	666.972	10020.9	2.43228	17.5651	0.793174	0.554102	2.49707	0.071795	0.556884	0.223015		446.961	2.40472	447.68	9.04029	452.321	54.0634	446.961	2.40472	98.815
JG-AW55-47	399.491	3601.35	0.904577	17.6548	1.72275	0.283064	3.73836	0.0387007	0.628675	0.168169		244.774	1.50999	253.085	8.37446	331.812	83.5804	244.774	1.50999	73.769
JG-AW55-48	472.095	6167.58	3.94845	17.54	1.10415	0.517306	1.7913	0.0680451	0.49048	0.273812		424.367	2.0144	423.35	6.20123	418.764	38.5002	424.367	2.0144	101.338
JG-AW55-49	206.569	2469.17	2.80424	16.6637	2.10161	0.40679	3.88419	0.0540534	0.526562	0.135566		339.36	1.74072	346.561	11.4048	396.073	86.335	339.36	1.74072	85.681
JG-AW55-50	216.87	712.084	2.49688	14.439	3.40915	0.247691	36.8727	0.0366708	0.542253	0.0147061		232.164	1.23652	224.698	74.4586	148.283	NA	232.164	1.23652	156.569
JG-AW55-51	663.914	5690.43	1.61098	19.2337	1.11668	0.235634	5.1767	0.0343052	0.528811	0.102152		217.437	1.13066	214.839	10.0241	187.446	119.942	217.437	1.13066	116
JG-AW55-52	237.178	345.546	1.19318	11.6233	4.45802	0.11613	68.3353	0.0193811	0.530504	0.00776325		123.743	0.650203	111.557	72.3165	NA	NA	123.743	0.650203	NA
JG-AW55-53	813.342	5011.63	4.73055	16.9559	1.0247	0.287468	3.80475	0.0368807	0.508999	0.13378		233.469	1.16709	256.565	8.62619	474.28	83.4374	233.469	1.16709	49.226
JG-AW55-54	307.903	1619.09	1.48972	15.272	3.41674	0.163247	8.70351	0.0208268	0.536449	0.061636		132.879	0.705532	153.541	12.4028	486.611	192.08	132.879	0.705532	27.307
JG-AW55-55	1172.61	8611.53	1.10497	19.5851	0.825329	0.237004	1.87494	0.0345441	0.439423	0.234367		218.926	0.945858	215.964	3.64756	184.784	42.4398	218.926	0.945858	118.476
JG-AW55-56	899.422	7451.22	0.906353	18.9156	1.32321	0.268508	3.32138	0.0379477	1.02052	0.307259		240.099	2.40519	241.5	7.13871	256.128	72.6701	240.099	2.40519	93.7417
JG-AW55-57	610.391	1202.27	1.44003	17.3788	1.92701	0.243448	17.5441	0.0386991	0.454939	0.0259312		244.764	1.09265	221.24	34.8907	NA	NA	244.764	1.09265	NA
JG-AW55-58	458.85	1714.5	0.796854	16.3206	2.82115	0.14038	9.54416	0.0191526	0.46668	0.048897		122.298	0.565363	133.382	11.9301	336.556	216.424	122.298	0.565363	36.3382
JG-AW55-59	167.624	635.825	1.37058	10.4576	6.24871	0.18316	16.9793	0.0180223	0.599893	0.0353308		115.145	0.684613	170.776	26.6955	1034.37	345.179	115.145	0.684613	11.1319
JG-AW55-60	1427.25	8829.47	1.02704	18.5241	0.65535	0.389613	3.22158	0.0536494	0.477973	0.148366		336.888	1.56888	334.087	9.17172	315.599	72.4639	336.888	1.56888	106.745
JG-AW55-61	475.615	4041.56	1.37532	18.346	1.28753	0.293472	3.68476	0.0415612	0.410485	0.111401		262.503	1.05589	261.288	8.48903	251.436	84.2845	262.503	1.05589	104.401
JG-AW55-62	831.369	835.767	2.58753	16.6515	1.76193	0.197324	17.1086	0.0336084	0.611783	0.0357589		213.093	1.28235	182.86	28.637	NA	NA	213.093	1.28235	NA
JG-AW55-63	208.506	5854.2	2.84881	15.0047	1.23227	1.12038	2.28966	0.125768	0.443619	0.193749		763.675	3.19483	763.156	12.285	762.534	47.3444	763.675	3.19483	100.15
JG-AW55-64	988.061	11564	1.70033	18.3766	0.718294	0.414978	0.981561	0.0562533	0.454033	0.462563		352.8	1.55878	352.454	2.92297	351.158	19.6528	352.8	1.55878	100.468
JG-AW55-65	396.61	1351.6	2.47813	16.1712	3.21301	0.122936	8.07076	0.0174001	0.460803	0.0570953		111.203	0.508033	117.73	8.97178	252.753	185.595	111.203	0.508033	43.9968
JG-AW55-66	1285.25	4460.15	1.86215	18.9281	1.31392	0.133475	3.16165	0.0194601	0.460893	0.145776		124.243	0.567143	127.215	3.78037	184.113	72.8707	124.243	0.567143	67.4817
JG-AW55-67	3960.45	20467.2	3.49011	14.0148	0.558989	1.50298	0.813487	0.153616	0.583006	0.716675		921.202	5.00457	931.596	4.95998	957.14	11.5946	957.14	11.5946	96.2453
JG-AW55-68	424.79	18522.2	2.49721	13.1857	0.611116	1.90738	0.959071	0.183477	0.555024	0.578711		1085.94	5.54693	1083.67	6.38884	1079.96	15.6946	1079.96	15.6946	100.554
JG-AW55-69	327.114	4026.71	4.51202	17.8345	1.43959	0.458832	3.50409	0.0632372	0.494272	0.141056		395.282	1.89508	383.445	11.1911	313.584	78.9238	395.282	1.89508	126.053
JG-AW55-70	812.547	7928.03	3.54973	18.6887	1.07322	0.283617	2.00908	0.0396473	0.611676	0.304456		250.647	1.50372	253.523	4.5074	281.232	43.7885	250.647	1.50372	89.1246
JG-AW55-71	40.7534	347.277	0.874964	7.45664	8.76238	0.542193	40.5778	0.0415885	0.516907	0.0127387		262.671	1.33048	439.87	145.85	1520.01	800.084	262.671	1.33048	17.2809
JG-AW55-72	524.991	1349.57	1.42863	16.4605	2.43218	0.128894	15.1911	0.0186722	0.389945	0.0256693		119.259	0.460768	123.104	17.6135	199.043	NA	119.259	0.460768	59.916
JG-AW55-73	1540.27	6909.79	1.93918	19.5605	1.06955	0.141215	2.64327	0.0208315	0.485026	0.183495		132.909	0.638043	134.126	3.32114	156.729	60.842	132.909	0.638043	84.8017
JG-AW55-74	476.491	5897.16	4.2446	18.3643	1.10293	0.42224	2.50505	0.0586642	0.517137	0.206438		367.497	1.84731	357.652	7.55162	295.274	55.9503	367.497	1.84731	124.46
JG-AW55-75	288.958	3692.25	11.1849	17.0527	1.80035	0.455139	3.10308	0.0600905	0.531193	0.171182		376.176	1.94104	380.872	9.85545	410.467	68.3683	376.176	1.94104	91.6459
JG-AW55-76	346.077	1544.93	2.67172	13.8105	0.786272	1.11542	1.35029	0.12754	0.47947	0.355087		773.814	3.49618	760.779	7.22946	723.57	26.7579	773.814	3.49618	106.944
JG-AW55-77	724.444	6205.2	1.70137	18.6977	1.00422	0.321098	3.15052	0.0453044	0.490251	0.15561		285.628	1.36973	282.747	7.7754	259.962	71.5244	285.628	1.36973	109.873
JG-AW55-78	635.581	4121.74	1.07483	18.3115	1.55759	0.280328	6.0026	0.0396047	0.616678	0.102735		250.382	1.51445	250.918	13.3456	256.906	137.317	250.382	1.51445	97.4605
JG-AW55-79	245.792	4382.39	1.40253	16.8806	1.65347	0.635852	3.41734	0.0820146	0.609553	0.17837		508.136	2.97843	499.735	13.4883	462.424	74.5627	508.136	2.97843	109.885
JG-AW55-80	868.338	2678.97	1.90514	17.7509	0.808043	0.354923	10.4976	0.0503309	0.515973	0.0491515		316.553	1.59387	308.417	27.9286	248.325	241.944	316.553	1.59387	127.475
JG-AW55-81	382.152	10816.5	3.85811	14.2643	0.711987	1.20529	1.29837	0.126302	0.483797	0.372617		766.734	3.49733	803.024	7.20548	905.936	24.8273	766.734	3.49733	84.6345
JG-AW55-82	1761.42	12623	1.21712	18.5289	0.628906	0.378871	1.40503	0.0517119	0.513282	0.365317		325.023	1.62693	326.207	3.92	335.654	29.6233	325.023	1.62693	96.8327
JG-AW55-83	205.178	3111.15	4.1316	16.9013	1.77669	0.532965	4.60315	0.0705175	0.57964	0.125922		439.273	2.46139	433.775	16.2513	405.643	102.249	439.273	2.46139	108.29
JG-AW55-84	287.482	2487.82	1.27392	16.8233	2.11998	0.293764	7.9316	0.0395324	0.414839	0.052302		249.934	1.01698	261.518	18.2886	367.601	178.711	249.934	1.01698	67.9906
JG-AW55-85	116.088	580.406	1.7612	11.074	6.95271	0.24048	24.7747	0.026478	0.52418	0.0211579		168.467	0.871634	218.814	48.8047	803.167	526.329	168.467	0.871634	20.9754
JG-AW55-86	957.8	8335.54	2.0227	18.7334	1.0588	0.30212	2.18332	0.0422328	0.785695	0.359862		266.658	2.05238	268.054	5.14375	281.29	46.5983	266.658	2.05238	94.7984
JG-AW55-87	3022.78	15102.7	2.3301	20.0708	0.676045	0.153851	1.89125	0.0227024	0.48841	0.258247		144.713	0.698916	145.306	2.56053	156.053	42.7773	144.713	0.698916	92.7331
JG-AW55-88	677.242	6771.62	2.24046	18.7448	1.12899	0.311383	3.52664	0.0438525	0.585834	0.166117		276.668	1.58653	275.252	8.50289	264.252	79.8645	276.668	1.58653	104.699
JG-AW55-89	1641.43	111654	1.74625	6.35265	0.492263	8.51094	0.689652	0.390004	0.4804	0.696584		2122.85	8.6891	2287.09	6.26642	2438.02	8.38243	2438.02	8.38243	87.0727
JG-AW55-90	1678.61	16314.1	23.741	16.8939	0.531229	0.579877	1.33313	0.0717497	0.452403	0.339353		446.688	1.95241	464.382	4.96843	553.784	27.3534	446.688	1.95241	80.6611
JG-AW55-91	674.041	6524.89	1.61259	19.1349	1.15527	0.28652	3.00993	0.0413497	0.550536	0.182907		261.194	1.40922	255.817	6.80662	207.821	68.6332	261.194	1.40922	125.682
JG-AW55-92	567.144	5294	1.80152	17.8174	1.25701	0.319331	2.29075	0.0431892	0.441264	0.192629		272.571	1.17768	281.388	5.62988	356.311	50.7438	272.571	1.17768	76.498
JG-AW55-93	373.306	1570.77	1.27888	14.1013	0.950071	1.03463	6.55602	0.12098	0.491477	0.0749658		736.2	3.41929	721.239	33.8634	675.924	139.925	736.2	3.41929	108.918
JG-AW55-94	535.587	4436.35	1.6134	18.2284	1.66099	0.267318	4.44323	0.037293	0.496164	0.111667		236.032	1.14993	240.547	9.51665	285.867	100.999	236.032	1.14993	82.567
JG-AW55-95	312.576	2997.5	0.989142	16.9492	2.13369	0.297846	4.16214	0.039716	0.529324	0.127176		251.073	1.30344	264.716	9.69903	388.216	92.7476	251.073	1.30344	64.6735
JG-AW55-96	283.762	7088.63	5.78083	16.791	1.15472	0.751972	2.30863	0.0943736	0.472713	0.204759		581.351	2.62785	569.368	10.0617	522.728	49.5763	581.351	2.62785	111.215
JG-AW55-97	931.526	25599.8	4.35111	15.0906	0.646004	1.14098	1.02303	0.125329	0.587289	0.57407		761.162	4.2164	772.975	5.53588	808.144	17.5287	761.162	4.2164	94.1865
JG-AW55-98	210.635	1760.47	1.32607	16.733	2.53646	0.314927	8.59939	0.0441894	0.484471	0.0563378		278.749	1.32168	277.993	20.9155	272.61	197.099	278.749	1.32168	102.252
JG-AW55-99	2269.67	5466.27	2.92467	19.6099	0.720389	0.174273	2.98913	0.0260487	0.484255	0.162005		165.771	0.792521	163.121	4.50443	125.825	69.4748	165.771	0.792521	131.747
JG-AW55-100	825.156	1347.18	0.978902	17.4447	1.53218	0.244799	15.2879	0.0381126	0.58785	0.0384521		241.124	1.39126	222.343	30.5364	29.0189	NA	241.124	1.39126	830.919
JG-AW55-101	800.796	4271.26	1.23083	18.1598	1.53761	0.170591	4.1756	0.0238528	0.547898	0.131214		151.96	0.822848	159.931	6.17881	280.694	94.7703	151.96	0.822848	54.1371
JG-AW55-102	789.685	3343.31	2.46845	18.1595	1.61753	0.150255	6.92617	0.0214068	0.568364	0.0820604		136.541	0.767888	142.137	9.18691	237.594	159.372	136.541	0.767888	57.4682
JG-AW55-103	1303.41	13743	1.8352	16.3518	0.737613	0.784744	1.18368	0.0943645	0.696327	0.588272		581.298	3.8706	588.186	5.2847	615.777	20.6898	581.298	3.8706	94.4008
JG-AW55-104	178.737	1279.41	1.15837	15.1579	3.64525	0.277859	11.1559	0.0368097	0.557304	0.049956		233.028	1.27548	248.958	24.6355	402.863	250.208	233.028	1.27548	57.8429
JG-AW55-105	422.157	1495.87	0.89773	15.9955	3.28084	0.130594	7.53659	0.0178519	0.421355	0.0559079		114.066	0.476394	124.631	8.83956	332.188	170.864	114.066	0.476394	34.3376
JG-AW55-106	481.219	4121.36	1.10878	18.3274	1.25879	0.30713	5.04227	0.0433425	0.507281	0.100606		273.518	1.35848	271.954	12.0304	259.485	115.289	273.518	1.35848	105.408
JG-AW55-107	482.633	2297.08	1.16124	16.2964	2.5762	0.147773	6.13593	0.0193387	0.532416	0.0867703		123.475	0.651145	139.944	8.02156	430.16	136.374	123.475	0.651145	28.7044
JG-AW55-108	447.164	3300.49	1.56176	18.4404	1.4574	0.26079	4.19927	0.0377108	0.4676	0.111353		238.628	1.09542	235.303	8.81989	203.241	96.8895	238.628	1.09542	117.411
JG-AW55-109	189.934	1449.87	1.25497	15.0172	3.52008	0.26193	16.821	0.0333455	0.547098	0.0325248		211.453	1.13809	236.221	35.4655	491.31	373.152	211.453	1.13809	43.0385
JG-AW55-110	347.516	1112.64	1.47289	14.4659	3.99579	0.117219	16.1106	0.0150651	0.535778	0.0332562		96.3916	0.512603	112.548	17.165	470.395	358.464	96.3916	0.512603	20.4916
JG-AW55-111	416.364	11085.4	1.2834	10.8936	0.4953	3.23623	1.49042	0.256766	0.440739	0.295715		1473.28	5.80474	1465.88	11.5616	1456	27.0806	1456	27.0806	101.187
JG-AW55-112	600.378	2366.35	2.83359	16.4694	2.43147	0.138338	9.15167	0.0182218	0.434599	0.0474886		116.408	0.501368	131.562	11.2932	415.668	204.63	116.408	0.501368	28.005
JG-AW55-113	437.339	3246.73	1.90908	17.6341	1.91729	0.31871	4.74886	0.043863	0.654285	0.137777		276.733	1.77231	280.91	11.6543	316.795	106.984	276.733	1.77231	87.3541
JG-AW55-114	674.409	18322.9	10.2244	14.1586	0.573206	1.39845	0.89161	0.143828	0.510433	0.572484		866.274	4.13752	888.281	5.27868	944.373	14.9565	944.373	14.9565	91.7301
JG-AW55-115	122.538	948.299	2.42567	14.6602	3.57374	0.28479	23.2155	0.0387284	0.499878	0.0215321		244.946	1.20146	254.45	52.2978	343.961	NA	244.946	1.20146	71.2133
JG-AW55-116	403.709	3920.92	1.30681	17.9125	1.58329	0.313622	4.63117	0.0433084	0.472934	0.10212		273.307	1.26555	276.984	11.2273	309.164	104.933	273.307	1.26555	88.402
JG-AW55-117	384.502	6656.5	2.38094	16.6397	0.990398	0.667408	2.69218	0.082894	0.461761	0.171519		513.374	2.27862	519.135	10.9421	545.532	57.9637	513.374	2.27862	94.1051
JG-AW55-118	60.7769	640.258	1.99608	11.9946	5.22831	0.371028	25.3131	0.0439383	0.502077	0.0198346		277.198	1.36225	320.415	69.6654	648.751	551.72	277.198	1.36225	42.728
JG-AW55-119	606.818	4942.66	1.56803	17.9301	1.34667	0.272096	4.51992	0.0370623	0.527698	0.116749		234.598	1.21571	244.368	9.81696	340.31	101.686	234.598	1.21571	68.9367
JG-AW55-120	258.633	3225.86	1.64109	17.1246	1.83068	0.437066	7.35988	0.0584046	0.490304	0.0666185		365.916	1.74413	368.181	22.7323	383.428	165.214	365.916	1.74413	95.4328
JG-AW55-121	591.85	9998.8	4.18672	16.9646	1.16516	0.626288	1.87641	0.078276	0.883569	0.470882		485.824	4.13483	493.781	7.3374	531.826	36.2683	485.824	4.13483	91.3503
JG-AW55-122	654.489	7425.16	2.01127	18.2599	1.23838	0.323177	2.62026	0.0439874	0.495171	0.188978		277.501	1.34495	284.344	6.49835	341.954	58.2414	277.501	1.34495	81.1516
JG-AW55-123	274.009	3220.92	2.35113	17.7163	1.75856	0.333468	3.25275	0.0461723	0.524768	0.161331		290.979	1.49301	292.21	8.25964	303.061	73.1876	290.979	1.49301	96.0135
JG-AW55-124	3462.49	35914.6	48.8527	16.6837	0.581077	0.808356	0.891717	0.0975663	0.560493	0.628555		600.131	3.21187	601.531	4.04742	607.734	14.9973	600.131	3.21187	98.7489
JG-AW55-125	173.84	6935.58	2.19895	13.2477	1.08251	1.88959	1.63944	0.184319	0.599545	0.365702		1090.52	6.01507	1077.44	10.8861	1051.95	30.7533	1051.95	30.7533	103.667
JG-AW55-126	379.086	3278.91	1.36165	17.4626	1.67382	0.284227	3.54977	0.0386808	0.505747	0.142473		244.65	1.21413	254.005	7.97741	342.261	79.5429	244.65	1.21413	71.4806
JG-AW55-127	1315.62	16411.8	1.93474	18.6796	0.696758	0.393971	1.82396	0.0538156	0.545271	0.298948		337.905	1.79504	337.266	5.23432	333.864	39.4506	337.905	1.79504	101.21
JG-AW55-128	690.373	2174.87	0.961676	17.8501	1.56531	0.187127	8.38453	0.0273397	0.539739	0.0643732		173.877	0.925938	174.174	13.4206	179.206	NA	173.877	0.925938	97.0262
JG-AW55-129	843.388	5710.81	1.34096	19.3311	1.12434	0.229319	4.96149	0.0335741	0.661177	0.133262		212.879	1.38452	209.636	9.39789	174.346	114.778	212.879	1.38452	122.101
JG-AW55-130	156.632	1414	0.618298	14.481	3.08073	0.358399	12.9743	0.0438763	0.498246	0.0384027		276.816	1.35003	311.018	34.7713	576.994	282.839	276.816	1.35003	47.9755
JG-AW55-131	82.4698	937.594	3.28125	14.2318	4.18654	0.410368	9.13045	0.0539881	0.453343	0.0496517		338.96	1.49695	349.14	26.9815	418.381	204.033	338.96	1.49695	81.017
JG-AW55-132	929.833	2226.59	1.54387	18.5366	1.17192	0.187882	9.38588	0.0285714	0.43362	0.0461992		181.601	0.77647	174.82	15.0747	85.1068	NA	181.601	0.77647	213.38
JG-AW55-133	392.772	4617.02	1.8962	17.9639	1.38164	0.391818	4.94678	0.0537116	0.398395	0.0805361		337.269	1.30912	335.696	14.1411	325.79	111.989	337.269	1.30912	103.523
JG-AW55-134	468.33	16330	2.86441	13.4144	0.664841	1.78597	1.08729	0.174451	0.601301	0.553026		1036.59	5.7577	1040.36	7.07753	1049.18	18.2798	1049.18	18.2798	98.7997
JG-AW55-135	334.501	7223.72	2.19412	16.419	1.03599	0.80136	2.6157	0.0979152	0.491162	0.187774		602.179	2.82374	597.596	11.8159	581.193	55.8296	602.179	2.82374	103.611
JG-AW55-136	495.177	2915.82	3.26576	18.2633	1.55518	0.24305	8.56035	0.0349467	0.499149	0.0583094		221.434	1.08652	220.915	16.9969	216.409	198.151	221.434	1.08652	102.322
JG-AW55-137	1319.5	4084.3	0.795874	18.5324	1.63773	0.106167	2.7692	0.0150697	0.505213	0.18244		96.4206	0.483504	102.453	2.69871	246.169	62.713	96.4206	0.483504	39.1685
JG-AW55-138	356.68	5837.79	1.65119	17.5137	1.22211	0.608781	2.81794	0.0799253	0.543316	0.192806		495.677	2.59216	482.791	10.8278	423.015	61.7224	495.677	2.59216	117.177
JG-AW55-139	645.094	12435.2	1.26909	15.8022	0.596708	0.9933	1.88789	0.11462	0.48415	0.256451		699.523	3.20945	700.403	9.5527	704.154	38.83	699.523	3.20945	99.3423
JG-AW55-140	366.618	1047.25	1.6957	15.5976	2.94578	0.135458	7.04859	0.0193935	0.401211	0.0569207		123.822	0.492046	128.99	8.53837	226.268	162.814	123.822	0.492046	54.7235
JG-AW55-141	191.549	1428.79	1.13172	15.25	2.6658	0.290418	16.5986	0.0376047	0.440054	0.0265115		237.968	1.0281	258.889	37.9488	453.831	370.596	237.968	1.0281	52.4355
JG-AW55-142	385.999	4034.11	1.28079	17.7109	1.58421	0.393509	6.89334	0.0533875	0.520312	0.0754804		335.285	1.69994	336.93	19.7678	349.3	155.568	335.285	1.69994	95.9878
JG-AW55-143	440.613	1466.58	1.55273	15.9273	2.30558	0.135601	8.76026	0.0184331	0.458179	0.052302		117.745	0.534588	129.118	10.6219	344.835	198.269	117.745	0.534588	34.1454
JG-AW55-144	591.781	6025.67	2.32858	17.9873	1.20126	0.423509	2.96269	0.0571608	0.517826	0.174783		358.336	1.80493	358.557	8.95012	360.949	65.8233	358.336	1.80493	99.2759
JG-AW55-145	426.858	5238.04	3.737	16.2016	1.16493	0.744422	2.56074	0.0906143	0.530776	0.207274		559.169	2.84286	564.983	11.0964	589.383	54.3558	559.169	2.84286	94.8736
JG-AW55-146	1471.41	6182.43	1.05582	19.6755	1.0768	0.126635	2.36955	0.0188504	0.462152	0.195038		120.386	0.551205	121.07	2.70438	135.561	54.6419	120.386	0.551205	88.8061
JG-AW55-147	700.69	10067.9	2.22368	17.6374	0.86914	0.581088	1.65463	0.0758373	0.533928	0.322687		471.228	2.42626	465.16	6.1748	436.266	34.8811	471.228	2.42626	108.014
JG-AW55-148	359.76	5605.23	2.20005	17.0483	0.957317	0.638123	2.96422	0.0818669	0.540174	0.182231		507.256	2.63504	501.143	11.7251	474.308	64.4784	507.256	2.63504	106.947
JG-AW55-149	415.452	1659.11	1.18551	16.3063	3.078	0.136651	11.0067	0.0187246	0.506527	0.0460199		119.59	0.600172	130.057	13.4369	326.8	250.245	119.59	0.600172	36.5943
JG-AW55-150	453.465	9695.83	3.33847	16.7616	0.894702	0.775841	2.52434	0.095936	0.4402	0.174382		590.548	2.48408	583.108	11.1986	555.166	54.2258	590.548	2.48408	106.373
JG-AW55-151	1221.56	5494.86	0.815117	19.008	1.18044	0.16459	5.24301	0.0237068	0.621853	0.118606		151.04	0.928332	154.713	7.52399	212.323	120.707	151.04	0.928332	71.1371
JG-AW55-152	257.161	2227.74	0.541536	16.2132	2.2002	0.359359	5.87607	0.046882	0.463707	0.0789145		295.35	1.33866	311.736	15.7742	437.105	130.5	295.35	1.33866	67.5697
JG-AW55-153	821.975	17913.2	5.07306	16.2361	0.650759	0.930975	1.00706	0.109894	0.549553	0.5457		672.132	3.50768	668.148	4.93003	655.688	18.0889	672.132	3.50768	102.508
JG-AW55-154	1223.57	13490.8	4.21581	18.6727	0.687315	0.393211	2.09899	0.0538987	0.517867	0.246722		338.413	1.70732	336.712	6.01526	325.956	46.1586	338.413	1.70732	103.822
JG-AW55-155	922.424	7628.76	1.39687	19.2668	1.012	0.262387	1.95106	0.03776	0.586075	0.300389		238.933	1.3747	236.589	4.11767	214.399	43.1104	238.933	1.3747	111.443
JG-AW55-156	1242.92	28502.1	8.87972	14.5989	0.512338	1.23916	0.73709	0.131071	0.490394	0.665311		793.973	3.66336	818.503	4.14186	886.668	11.3638	793.973	3.66336	89.5456
JG-AW55-157	390.86	2593.13	1.17958	17.7148	1.75246	0.293479	9.03818	0.0415571	0.581759	0.0643668		262.477	1.49632	261.294	20.8252	251.72	207.882	262.477	1.49632	104.274
JG-AW55-158	281.317	4063.99	0.946182	17.204	1.66013	0.546976	2.47453	0.0721176	0.872782	0.352706		448.901	3.78463	443.014	8.88422	413.5	51.7782	448.901	3.78463	108.561
JG-AW55-159	686.935	2645.77	1.93079	18.3078	1.86893	0.144858	6.31687	0.0212176	0.496869	0.0786574		135.347	0.665485	137.362	8.11582	173.328	147.096	135.347	0.665485	78.0872
JG-AW55-160	485.06	2478.68	1.68076	18.2941	1.88747	0.234821	6.31707	0.0346284	0.496398	0.0785804		219.451	1.07102	214.17	12.1983	157.499	147.529	219.451	1.07102	139.335
JG-AW55-161	280.266	2473.59	1.06101	16.8017	2.285	0.332672	5.88737	0.04459	0.462893	0.0786249		281.222	1.27377	291.603	14.9236	376.584	132.124	281.222	1.27377	74.6771
JG-AW55-162	314.127	2161.87	1.06785	16.0842	3.04152	0.238434	12.1553	0.0309133	0.478677	0.03938		196.262	0.925305	217.138	23.7669	450.929	270.624	196.262	0.925305	43.5239
JG-AW55-163	263.713	2608.98	3.02776	16.7399	2.07942	0.353991	8.47854	0.0468878	0.528313	0.0623118		295.386	1.52535	307.718	22.5112	403.221	189.786	295.386	1.52535	73.2566
JG-AW55-164	378.945	508.117	1.98786	14.1854	3.28161	0.251392	35.305	0.0435799	0.448719	0.0127098		274.985	1.20796	227.706	72.1364	NA	NA	274.985	1.20796	NA
JG-AW55-165	398.086	3061.77	0.883373	18.0545	1.69884	0.284152	4.94287	0.0401911	0.516818	0.104558		254.018	1.28728	253.945	11.1061	254.273	113.082	254.018	1.28728	99.8997
JG-AW55-166	1142.25	30537.4	27.7351	14.1356	0.638462	1.48623	0.936586	0.151342	0.612642	0.654122		908.483	5.19135	924.779	5.68496	964.753	14.4472	964.753	14.4472	94.1673
JG-AW55-167	715.231	6327.12	1.90226	18.7242	1.1112	0.318569	2.41986	0.0446989	0.543758	0.224707		281.894	1.49979	280.802	5.93643	272.691	54.048	281.894	1.49979	103.375
JG-AW55-168	298.229	274.623	0.684602	12.157	3.84796	0.112919	149.659	0.0296934	0.469037	0.00313405		188.629	0.87192	108.632	155.385	NA	NA	188.629	0.87192	NA
JG-AW55-169	245.883	2866.72	1.84936	16.5594	1.81976	0.402733	4.61955	0.0521143	0.497351	0.107662		327.489	1.58809	343.629	13.4678	455.249	101.96	327.489	1.58809	71.9362
JG-AW55-170	1395.57	1632.23	15.3866	18.0108	1.17042	0.135796	3.26265	0.0209111	0.470668	0.144259		133.411	0.621471	129.293	3.96085	55.2978	NA	133.411	0.621471	241.26
JG-AW55-171	1170.36	9105.77	0.78257	19.1023	0.832348	0.273917	2.83846	0.0386337	0.517045	0.182157		244.359	1.2398	245.821	6.19721	260.807	64.1326	244.359	1.2398	93.6932
JG-AW55-172	590.318	7917.64	6.14921	17.3812	0.977478	0.645938	2.80118	0.0827299	0.529013	0.188854		512.397	2.60571	505.976	11.1626	477.994	60.8139	512.397	2.60571	107.197
JG-AW55-173	987.741	37739.6	4.33621	13.2065	0.701355	1.91369	1.03496	0.181178	0.683391	0.660307		1073.41	6.75738	1085.87	6.90221	1111.81	15.513	1111.81	15.513	96.5462
JG-AW55-174	850.292	10008.5	1.75611	18.2654	0.939541	0.444017	1.74642	0.0594364	0.597098	0.341898		372.197	2.15944	373.081	5.45268	379.531	36.8973	372.197	2.15944	98.0678
JG-AW55-175	646.215	5399.69	1.05393	18.598	1.24399	0.303288	3.89281	0.042376	0.620758	0.159463		267.543	1.62681	268.965	9.19857	282.38	87.9291	267.543	1.62681	94.7457
JG-AW55-176	465.749	1967.62	1.01499	17.2035	2.37027	0.14466	14.3303	0.0204083	0.613773	0.0428304		130.236	0.791332	137.186	18.391	260.248	NA	130.236	0.791332	50.0431
JG-AW55-177	689.929	3337.16	1.74822	17.4001	1.67282	0.190814	3.86226	0.0257633	0.508268	0.131599		163.978	0.822934	177.324	6.2841	360.141	86.4175	163.978	0.822934	45.5315
JG-AW55-178	514.769	5861.21	1.72395	18.3935	1.25576	0.402362	2.9302	0.0555975	0.69739	0.238001		348.796	2.36783	343.36	8.53678	307.704	64.8066	348.796	2.36783	113.354
JG-AW55-179	230.084	2023.81	0.891318	15.4421	2.57299	0.324122	6.48572	0.0403518	0.571029	0.0880441		255.013	1.42777	285.068	16.1215	540.387	141.443	255.013	1.42777	47.1909
JG-AW55-180	694.473	3956.63	0.993311	18.1081	1.64465	0.216855	4.54709	0.0302095	0.528655	0.116262		191.859	0.99933	199.289	8.22817	289.152	103.246	191.859	0.99933	66.3523
JG-AW55-181	2079.72	8715.72	1.339	19.6604	0.923014	0.157717	1.90254	0.0230073	0.581859	0.305832		146.634	0.843574	148.702	2.63172	182.803	42.1936	146.634	0.843574	80.2144
JG-AW55-182	1338.56	5682.17	1.2288	19.1026	1.17997	0.14617	3.53779	0.0210723	0.420002	0.118719		134.429	0.558759	138.525	4.58115	210.311	81.4536	134.429	0.558759	63.9192
JG-AW55-183	396.462	6172.82	2.92641	16.4834	1.08344	0.76077	3.02187	0.0935821	0.481783	0.159432		576.687	2.65773	574.454	13.2581	566.598	64.9792	576.687	2.65773	101.781
JG-AW55-184	429.668	2518.03	0.787875	16.9679	2.1037	0.322788	9.32239	0.0435862	0.578967	0.062105		275.024	1.55881	284.045	23.1025	359.932	210.338	275.024	1.55881	76.4098
JG-AW55-185	396.222	2152.12	1.94158	17.9269	2.048	0.18656	9.92689	0.0274008	0.612399	0.061691		174.261	1.05288	173.69	15.8492	166.926	NA	174.261	1.05288	104.394
JG-AW55-186	525.16	8142.22	2.83899	16.5489	0.729954	0.756323	2.32909	0.0929669	0.42422	0.182139		573.06	2.32611	571.887	10.1844	568.195	49.8561	573.06	2.32611	100.856
JG-AW55-187	928.919	7366.12	1.37483	18.7285	0.805778	0.386002	2.70897	0.0541299	0.449475	0.165921		339.827	1.48788	331.445	7.66068	273.986	61.2332	339.827	1.48788	124.031
JG-AW55-188	403.457	3259.89	1.486	17.6711	1.59089	0.30169	4.73125	0.0417461	0.650107	0.137407		263.647	1.67941	267.719	11.1346	304.467	106.826	263.647	1.67941	86.5931
JG-AW55-189	1099.82	19574.8	2.32173	16.8587	0.73416	0.729004	1.12273	0.0897162	0.56673	0.504778		553.858	3.00782	555.969	4.80665	565.546	21.1055	553.858	3.00782	97.9334
JG-AW55-190	658.456	11907.5	12.0326	16.2722	0.59413	0.893452	1.22081	0.106935	0.392058	0.321147		654.92	2.44155	648.222	5.84923	625.882	24.9373	654.92	2.44155	104.64
JG-AW55-191	520.715	17452.3	8.89184	13.3335	0.594619	1.70907	0.966514	0.166138	0.505803	0.523327		990.796	4.64535	1011.94	6.19132	1058.88	16.5973	1058.88	16.5973	93.5705
JG-AW55-192	1227.38	1341.84	2.5641	17.7787	1.45437	0.122409	16.2164	0.0195213	0.543854	0.0335374		124.63	0.671293	117.254	17.9593	NA	NA	124.63	0.671293	NA
JG-AW55-193	1206.81	9818.62	0.968104	19.3094	0.836226	0.278978	2.10897	0.0400024	0.432577	0.205113		252.848	1.07259	249.846	4.671	222.761	47.7398	252.848	1.07259	113.507
JG-AW55-194	217.965	665.85	1.12431	12.7048	3.98747	0.171135	15.5107	0.0217219	0.518481	0.0334272		138.529	0.710585	160.403	23.018	497.873	343.349	138.529	0.710585	27.8242
JG-AW55-195	425.222	3860.54	1.5902	18.1009	1.85819	0.277801	5.01114	0.038992	1.0097	0.201491		246.582	2.44273	248.911	11.0625	271.905	112.563	246.582	2.44273	90.6866
JG-AW55-196	127.03	2174.25	1.49025	16.013	2.40335	0.642086	4.40531	0.0832898	0.553623	0.125672		515.73	2.74397	503.597	17.4923	449.795	97.1268	515.73	2.74397	114.659
JG-AW55-197	1083.72	2391.57	0.918642	18.2328	1.5047	0.123896	5.89432	0.0184048	0.55997	0.0950016		117.566	0.652369	118.598	6.59785	140.377	137.876	117.566	0.652369	83.7504
JG-AW55-198	251.395	1959.76	1.62837	15.7833	2.27485	0.340511	8.27212	0.0440389	0.693685	0.0838582		277.819	1.88625	297.559	21.3389	456.452	183.162	277.819	1.88625	60.865
JG-AW55-199	308.491	4026.61	2.04467	17.3037	1.69733	0.482624	4.54823	0.0644396	0.482355	0.106053		402.569	1.88242	399.872	15.0343	385.271	101.646	402.569	1.88242	104.49
JG-AW55-200	334.977	2043.1	0.796864	17.0996	1.89307	0.324719	3.80035	0.0458336	0.538977	0.141823		288.891	1.52268	285.526	9.4591	259.071	86.4765	288.891	1.52268	111.51
JG-AW55-201	319.926	1100.35	1.47984	15.6342	2.62495	0.191037	11.2178	0.0272976	0.518848	0.0462522		173.613	0.888763	177.514	18.2716	230.77	NA	173.613	0.888763	75.2319
JG-AW55-202	589.378	9166.35	2.6552	17.6488	0.986376	0.596286	1.48895	0.0783069	0.577581	0.387913		486.009	2.70389	474.874	5.64751	422.382	30.6301	486.009	2.70389	115.064
JG-AW55-203	183.666	1456.73	2.05198	16.114	2.80982	0.330327	8.21656	0.0459396	0.707071	0.0860544		289.545	2.00199	289.816	20.7189	292.971	187.213	289.545	2.00199	98.8306
JG-AW55-204	354.371	163.507	2.20848	8.71948	8.04804	0.0523578	338.395	0.0176152	0.575402	0.00170039		112.566	0.642086	51.8183	172.594	NA	NA	112.566	0.642086	NA
JG-AW55-205	94.6286	71.4435	1.61183	5.60684	7.39064	-0.0965831	46.5804	0.0127397	0.489379	0.0105061		81.6064	0.396848	NA	-50.6064	NA	NA	81.6064	0.396848	NA
JG-AW55-206	528.983	2376.55	1.04343	17.1503	2.07865	0.139397	7.39821	0.0193235	0.500261	0.0676193		123.379	0.611348	132.507	9.19068	300.437	168.524	123.379	0.611348	41.0665
JG-AW55-207	3093.72	11364.9	0.738147	19.3752	0.608696	0.253079	1.55229	0.036348	0.528221	0.340285		230.156	1.19429	229.074	3.18333	218.997	33.8041	230.156	1.19429	105.095
JG-AW55-208	91.9385	762.018	2.16948	12.0022	5.08223	0.382845	14.1787	0.0429693	0.487653	0.0343934		271.212	1.29514	329.13	39.8785	762.871	300.089	271.212	1.29514	35.5515
JG-AW55-209	301.116	9045.53	3.42279	13.78	0.835745	1.49443	1.27737	0.152139	0.532981	0.417248		912.943	4.53697	928.123	7.77069	965.266	23.6877	965.266	23.6877	94.5794
JG-AW55-210	566.482	15011.7	0.993106	8.18788	0.755312	5.82317	1.14091	0.346554	0.756197	0.662805		1918.12	12.5459	1949.86	9.88705	1984.5	15.2051	1984.5	15.2051	96.6552
JG-AW55-211	129.566	1346.63	1.92733	14.2033	3.59196	0.331862	7.34914	0.0401657	0.494373	0.0672695		253.86	1.23062	290.986	18.5957	601.75	158.901	253.86	1.23062	42.187
JG-AW55-212	1555.55	4979.15	1.27646	18.1338	0.733299	0.397473	1.80852	0.0549478	0.626804	0.346584		344.827	2.1046	339.814	5.223	306.663	38.6654	344.827	2.1046	112.445
JG-AW55-213	383.223	1507.47	1.36698	16.3756	2.92504	0.131296	12.1024	0.018467	0.584569	0.0483017		117.96	0.683289	125.262	14.2629	267.162	NA	117.96	0.683289	44.1531
JG-AW55-214	880.06	15091.7	1.88324	13.0773	0.584232	1.77509	1.0676	0.169551	0.562052	0.526463		1009.63	5.25261	1036.38	6.93407	1094.14	18.1557	1094.14	18.1557	92.2767
JG-AW55-215	372.409	4772.26	1.58739	17.5099	1.25839	0.533074	3.75834	0.0711476	0.554074	0.147425		443.066	2.37245	433.847	13.2701	386.154	83.5245	443.066	2.37245	114.738
JG-AW55-216	362.791	2742.2	1.49751	17.4468	1.89391	0.277745	7.4541	0.0385525	0.535021	0.0717753		243.854	1.2803	248.867	16.4538	297.413	169.861	243.854	1.2803	81.9918
JG-AW55-217	331.176	1439.38	1.70155	16.9255	1.9353	0.348554	8.87292	0.0514543	0.493518	0.0556207		323.444	1.55687	303.633	23.2903	155.084	NA	323.444	1.55687	208.56
JG-AW55-218	107.997	973.055	4.16244	13.0212	4.75116	0.359059	15.3046	0.04181	0.941243	0.0615009		264.043	2.43507	311.512	41.0785	684.861	327.862	264.043	2.43507	38.5542
JG-AW55-219	2649.07	6188.65	2.56165	19.9234	0.933511	0.113619	4.33827	0.0171119	0.555044	0.127941		109.377	0.601971	109.271	4.49432	107.953	101.671	109.377	0.601971	101.319
JG-AW55-220	850.036	13175.8	1.73261	15.8697	0.624184	0.978531	1.80091	0.113792	0.571021	0.317074		694.735	3.76079	692.851	9.04409	687.655	36.4475	694.735	3.76079	101.03
JG-AW55-221	567.451	2620.72	1.0327	17.2586	2.29493	0.152613	9.58796	0.0209919	0.47781	0.0498343		133.922	0.63329	144.217	12.8911	318.07	218.147	133.922	0.63329	42.1045
JG-AW55-222	1247.93	7617.01	0.665437	19.2856	0.998045	0.257014	2.00847	0.0370687	0.711548	0.354274		234.638	1.63954	232.258	4.16979	209.27	43.5689	234.638	1.63954	112.122
JG-AW55-223	190.722	1390.62	0.95778	14.8638	3.17509	0.257409	7.55571	0.0326408	0.500965	0.0663029		207.055	1.02079	232.577	15.7068	500.061	166.249	207.055	1.02079	41.406
JG-AW55-224	385.802	2799.87	1.36034	17.3017	1.77953	0.301528	5.78435	0.041309	0.459664	0.0794669		260.942	1.1755	267.593	13.6077	327.2	130.939	260.942	1.1755	79.7498
JG-AW55-225	361.834	1930.1	1.27769	17.3062	2.03812	0.273783	15.199	0.0392985	0.486712	0.0320226		248.483	1.18638	245.714	33.1827	220.331	NA	248.483	1.18638	112.777
JG-AW55-226	2499.82	14327.4	0.74865	18.6963	0.598657	0.40267	1.425	0.0552741	0.484596	0.340066		346.821	1.63627	343.583	4.15377	322.75	30.4424	346.821	1.63627	107.458
JG-AW55-227	370.156	2650.17	1.17894	17.3918	1.94236	0.294766	7.9782	0.0408481	0.649762	0.0814421		258.088	1.64383	262.304	18.4446	301.153	181.572	258.088	1.64383	85.6999
JG-AW55-228	801.752	12111.1	7.65197	14.9769	1.07008	0.985016	2.12999	0.10808	1.01212	0.475176		661.585	6.36391	696.174	10.7326	810.419	39.2273	661.585	6.36391	81.6349
JG-AW55-229	445.422	1366.69	1.09706	15.7451	2.67493	0.126531	14.759	0.0172317	0.553921	0.0375311		110.137	0.604889	120.976	16.8337	340.72	335.555	110.137	0.604889	32.3247
JG-AW55-230	891.499	6570.11	2.10902	18.8776	1.06633	0.298739	2.57228	0.0423249	0.569175	0.221272		267.228	1.4899	265.415	6.00792	250.429	57.7302	267.228	1.4899	106.708
JG-AW55-231	475.778	1375.28	1.25915	15.1462	3.22746	0.115945	6.35962	0.0150456	0.511016	0.0803532		96.2675	0.488288	111.389	6.70929	448.989	140.937	96.2675	0.488288	21.4409
JG-AW55-232	531.855	11918.2	3.75784	16.3134	0.706888	0.868025	1.73352	0.103852	0.468552	0.27029		636.946	2.84172	634.494	8.17931	626.689	35.9757	636.946	2.84172	101.637
JG-AW55-233	255.889	1215.92	1.28968	16.472	2.27604	0.245535	11.0056	0.0363542	0.472837	0.0429633		230.195	1.06924	222.943	22.0327	148.124	NA	230.195	1.06924	155.407
JG-AW55-234	265.296	742.015	1.19562	13.3085	4.62756	0.114692	21.1128	0.0148695	0.622668	0.0294925		95.1492	0.588113	110.248	22.0608	450.994	473.383	95.1492	0.588113	21.0977
JG-AW55-235	466.254	1397.62	0.60986	16.4375	2.58354	0.106281	15.1044	0.0151852	0.528092	0.0349627		97.1541	0.509216	102.558	14.7351	230.995	NA	97.1541	0.509216	42.0589
JG-AW55-236	218.394	1521.19	0.784759	15.4464	2.97026	0.30688	8.7424	0.0400039	0.434711	0.0497245		252.857	1.07792	271.76	20.8475	438.865	194.663	252.857	1.07792	57.6161
JG-AW55-237	1382.01	40773.5	4.29752	13.2745	0.482222	1.83021	0.78506	0.175461	0.474619	0.604564		1042.13	4.56706	1056.36	5.15489	1086.74	12.5234	1086.74	12.5234	95.8955
JG-AW55-238	539.303	6809.83	3.02103	18.0945	1.10895	0.435563	3.49614	0.0588668	0.494079	0.141321		368.73	1.7707	367.119	10.7712	357.916	78.1236	368.73	1.7707	103.021
JG-AW55-239	220.656	893.895	1.0977	15.1185	2.76688	0.275411	28.1497	0.0397774	0.61994	0.022023		251.453	1.52885	247.011	61.7974	206.025	NA	251.453	1.52885	122.05
JG-AW55-240	328.462	2495.02	1.06041	17.0955	2.12802	0.255963	4.52831	0.0349003	0.741516	0.163751		221.145	1.61202	231.409	9.37086	337.965	101.22	221.145	1.61202	65.4342
JG-AW55-241	64.7829	528.069	1.85439	9.558	6.41229	0.410583	25.4306	0.037881	0.538844	0.0211888		239.685	1.26781	349.295	75.298	1163.18	512.072	239.685	1.26781	20.6061
JG-AW55-242	221.955	4970.61	2.89896	15.9909	2.03166	0.830247	3.31356	0.100039	0.527737	0.159266		614.635	3.09382	613.749	15.2635	611.404	70.6968	614.635	3.09382	100.529
JG-AW55-243	1060.34	4789.6	13.8033	18.7471	1.36852	0.171109	2.29174	0.0245007	0.691406	0.301694		156.038	1.0659	160.381	3.39995	226.017	50.5282	156.038	1.0659	69.0379
JG-AW55-244	462.891	2013.9	1.89039	17.2819	1.92003	0.285902	6.58114	0.0407247	0.560024	0.0850953		257.324	1.41269	255.329	14.8584	238.039	151.344	257.324	1.41269	108.102
JG-AW55-245	579.735	5599.68	1.87957	18.6466	1.30623	0.311707	2.71905	0.0439728	0.555881	0.204439		277.412	1.50937	275.504	6.56091	260.351	61.1614	277.412	1.50937	106.553
JG-AW55-246	552.832	4545.69	1.50131	18.5892	1.51252	0.311082	3.20372	0.0443049	0.53768	0.16783		279.462	1.47051	275.019	7.71859	238.384	72.8707	279.462	1.47051	117.232
JG-AW55-247	188.335	534.769	1.27409	11.5054	5.88472	0.155254	20.5028	0.0187105	0.599989	0.0292637		119.501	0.710387	146.541	27.9846	611	447.198	119.501	0.710387	19.5583
JG-AW55-248	426.279	12931.1	2.21768	13.4283	0.686415	1.80944	1.24512	0.177585	0.496267	0.398569		1053.77	4.82445	1048.88	8.14283	1039.57	23.0722	1039.57	23.0722	101.366
JG-AW55-249	1426.86	7921.28	0.96274	19.6631	0.78587	0.218111	1.94467	0.0320528	0.564571	0.290317		203.383	1.13032	200.337	3.53564	165.616	43.4756	203.383	1.13032	122.804
JG-AW55-250	6130.01	17657.8	0.780743	20.3418	0.64885	0.134354	1.55643	0.0200196	0.569684	0.36602		127.78	0.720773	128.003	1.87181	133.149	34.0386	127.78	0.720773	95.9673
JG-AW55-251	652.434	3269.58	1.43682	18.475	1.4291	0.247451	5.74241	0.0359012	0.793455	0.138175		227.376	1.77268	224.504	11.5667	195.546	132.258	227.376	1.77268	116.278
JG-AW55-252	504.202	3580.85	1.76305	18.2938	1.82117	0.27747	7.29874	0.0395345	0.981999	0.134544		249.947	2.4075	248.649	16.0983	237.399	166.985	249.947	2.4075	105.285
JG-CL40
JG-CL40-1	147.641	3192.58	1.7339	23.2893	3.31141	0.0877387	3.53186	0.0148264	1.22825	0.347762		94.8755	1.15677	85.3946	2.89268	NA	NA	94.8755	1.15677	NA
JG-CL40-2	200.169	31349.6	5.7517	20.8651	1.3346	0.100426	1.5319	0.0152039	0.752032	0.490915		97.273	0.726032	97.1696	1.41954	94.6123	31.6257	97.273	0.726032	NA
JG-CL40-3	62.455	6573.57	2.23785	21.0885	1.86127	0.099893	2.11769	0.0152851	1.01009	0.476978		97.7886	0.980302	96.6776	1.95289	69.3416	44.2763	97.7886	0.980302	NA
JG-CL40-4	441.975	10180.6	2.64894	19.6959	1.51865	0.107033	1.96456	0.0152961	1.24627	0.634376		97.8587	1.21037	103.248	1.92865	229.464	35.0675	97.8587	1.21037	NA
JG-CL40-5	116.208	1874.93	1.70435	12.4112	6.87447	0.178398	7.02286	0.0160653	1.43607	0.204485		102.741	1.46373	166.681	10.7959	1210.18	135.458	102.741	1.46373	NA
JG-CL40-6	1631.97	14684	0.861813	19.1141	1.87901	0.12193	2.11763	0.0169104	0.976576	0.461163		108.1	1.04687	116.821	2.33683	298.295	42.8913	108.1	1.04687	NA
JG-CL40-7	329.911	7908.24	1.99296	21.1956	1.55543	0.112595	1.92558	0.0173162	1.13512	0.589495		110.672	1.24553	108.337	1.97867	57.2719	37.0798	110.672	1.24553	NA
JG-CL40-8	327.96	11038.1	1.53508	21.6328	1.85789	0.112053	2.20942	0.0175883	1.19574	0.541202		112.396	1.33232	107.842	2.26051	8.35571	44.6921	112.396	1.33232	NA
JG-CL40-9	117.705	5534.09	1.21696	21.8559	1.7865	0.113931	2.18352	0.0180676	1.25547	0.574974		115.431	1.43631	109.555	2.26763	NA	NA	115.431	1.43631	NA
JG-CL40-10	580.261	36125.7	4.17808	20.4041	0.883023	0.122241	1.5033	0.0180977	1.21663	0.809304		115.622	1.39415	117.102	1.66267	147.281	20.6829	115.622	1.39415	NA
JG-CL40-11	712.724	71264.6	1.07182	19.821	1.21778	0.126513	1.6704	0.0181949	1.14336	0.68448		116.238	1.3171	120.96	1.90481	214.852	28.2269	116.238	1.3171	NA
JG-CL40-12	171.355	16331.2	1.39355	21.0014	1.35468	0.120139	1.96877	0.0183071	1.42861	0.725633		116.948	1.65566	115.198	2.14407	79.1699	32.1699	116.948	1.65566	NA
JG-CL40-13	149.18	5928.66	2.37484	16.228	1.91749	0.155529	2.14804	0.0183132	0.968146	0.450711		116.986	1.12238	146.782	2.93565	660.077	41.1265	116.986	1.12238	NA
JG-CL40-14	135.516	5680.16	2.03334	21.7709	3.20006	0.11613	3.42228	0.0183446	1.21311	0.354473		117.185	1.40874	111.557	3.61556	NA	NA	117.185	1.40874	NA
JG-CL40-15	129.321	15559.6	1.47655	20.9736	1.56855	0.123183	1.8932	0.0187462	1.06012	0.559962		119.727	1.25754	117.954	2.10828	82.3136	37.2052	119.727	1.25754	NA
JG-CL40-16	368.256	19830.9	1.59674	20.7847	1.05526	0.12453	1.65599	0.0187805	1.27622	0.77067		119.944	1.5166	119.171	1.86206	103.794	24.9685	119.944	1.5166	NA
JG-CL40-17	134.464	7540.06	2.51134	20.9108	1.56334	0.124162	1.78441	0.0188385	0.860286	0.482112		120.311	1.02542	118.838	2.00117	89.4724	37.0655	120.311	1.02542	NA
JG-CL40-18	399.081	4727.45	2.35587	17.3096	2.23544	0.150101	2.52312	0.018852	1.17002	0.463719		120.397	1.39559	142.001	3.34362	520.132	49.0538	120.397	1.39559	NA
JG-CL40-19	436.184	29056.5	2.00827	20.8433	0.796902	0.125183	1.3627	0.0189322	1.1054	0.811182		120.904	1.32402	119.76	1.53941	97.0838	18.8718	120.904	1.32402	NA
JG-CL40-20	454.175	29683.4	2.70402	19.1643	1.02228	0.137033	1.46936	0.0190549	1.05544	0.718298		121.68	1.27221	130.398	1.79809	292.343	23.3474	121.68	1.27221	NA
JG-CL40-21	412.125	37113.4	1.90288	21.0024	1.54267	0.127763	2.32092	0.0194698	1.73402	0.747128		124.304	2.13482	122.086	2.6698	79.0567	36.637	124.304	2.13482	NA
JG-CL40-22	81.9915	4188.68	1.77247	22.5192	2.40411	0.120025	2.72862	0.0196116	1.29059	0.472983		125.201	1.60024	115.095	2.96907	NA	NA	125.201	1.60024	NA
JG-CL40-23	345.44	10699.9	1.4877	21.031	1.78878	0.128668	2.26947	0.0196343	1.39669	0.615427		125.345	1.73377	122.9	2.62699	75.8254	42.5081	125.345	1.73377	NA
JG-CL40-24	494.103	74107.5	1.12406	20.6429	0.829201	0.131917	1.45572	0.0197587	1.19647	0.821911		126.131	1.49445	125.819	1.72263	119.932	19.5335	126.131	1.49445	NA
JG-CL40-25	381.476	30094	1.61216	21.0434	1.19795	0.129572	1.86888	0.019784	1.43444	0.767541		126.29	1.79393	123.713	2.17674	74.4433	28.4737	126.29	1.79393	NA
JG-CL40-26	238.174	9620.21	1.59144	18.9808	2.12912	0.143818	2.35713	0.0198069	1.01139	0.429077		126.436	1.2663	136.439	3.00935	314.254	48.4344	126.436	1.2663	NA
JG-CL40-27	155.68	24730.9	1.67711	20.3034	1.72499	0.134503	1.8693	0.0198148	0.720187	0.385272		126.485	0.902051	128.136	2.25028	158.893	40.3565	126.485	0.902051	NA
JG-CL40-28	137.205	9936.99	4.00415	20.3667	1.71565	0.136242	2.22732	0.0201335	1.42039	0.637712		128.499	1.80712	129.691	2.71177	151.592	40.2144	128.499	1.80712	NA
JG-CL40-29	1229.12	62460.1	0.753014	20.8433	0.683294	0.133678	1.0916	0.020217	0.851296	0.779859		129.027	1.08748	127.398	1.30697	97.0842	16.1881	129.027	1.08748	NA
JG-CL40-30	235.46	23410.7	2.06357	20.4882	1.16372	0.13646	1.67116	0.020286	1.19939	0.717696		129.463	1.53728	129.886	2.03751	137.605	27.3333	129.463	1.53728	NA
JG-CL40-31	101.845	13294.4	2.67389	21.536	2.02601	0.130973	2.26079	0.0204661	1.00322	0.443747		130.601	1.29703	124.972	2.6584	19.1894	48.6514	130.601	1.29703	NA
JG-CL40-32	192.625	96486.3	1.70478	21.0763	1.21258	0.133878	1.61663	0.0204735	1.06918	0.661364		130.648	1.3828	127.577	1.93814	70.7385	28.8479	130.648	1.3828	NA
JG-CL40-33	556.244	30191.4	1.92278	20.6011	1.08582	0.138299	1.71353	0.0206727	1.32559	0.773601		131.906	1.73076	131.528	2.1139	124.675	25.5573	131.906	1.73076	NA
JG-CL40-34	286.615	111670	2.38616	18.2463	2.42634	0.157267	2.81015	0.020821	1.41767	0.504483		132.842	1.864	148.308	3.87762	403.303	54.3305	132.842	1.864	NA
JG-CL40-35	216.65	8456.41	1.32832	21.7814	1.2412	0.132072	1.72053	0.020873	1.19148	0.69251		133.171	1.57043	125.958	2.03812	NA	NA	133.171	1.57043	NA
JG-CL40-36	188.263	4700.23	1.9134	14.9993	2.91002	0.19252	3.29013	0.0209524	1.53516	0.466596		133.672	2.03095	178.778	5.39333	826.589	60.7469	133.672	2.03095	NA
JG-CL40-37	549.827	11269.7	1.01872	20.9066	1.07209	0.138906	1.65124	0.0210714	1.25586	0.76056		134.424	1.6707	132.069	2.04491	89.9381	25.42	134.424	1.6707	NA
JG-CL40-38	1174.23	26668.8	2.15853	20.7978	0.610894	0.140076	1.29198	0.0211382	1.13843	0.881151		134.845	1.51917	133.111	1.61181	102.256	14.4318	134.845	1.51917	NA
JG-CL40-39	730.255	53025.4	2.70583	20.4419	0.795471	0.144618	1.38481	0.0214502	1.13355	0.818557		136.815	1.53452	137.148	1.77657	142.945	18.69	136.815	1.53452	NA
JG-CL40-40	212.696	14146.2	1.59797	19.9375	1.70217	0.149718	1.89347	0.0216586	0.829348	0.438005		138.13	1.13339	141.663	2.50363	201.247	39.5159	138.13	1.13339	NA
JG-CL40-41	564.422	32626.5	2.8165	20.6323	0.844971	0.145152	1.44572	0.0217299	1.17309	0.811421		138.58	1.60831	137.622	1.86069	121.136	19.91	138.58	1.60831	NA
JG-CL40-42	236.853	10228.5	3.29969	21.1576	1.41468	0.142795	1.80875	0.0219214	1.12705	0.62311		139.788	1.55852	135.531	2.29485	61.5444	33.71	139.788	1.55852	NA
JG-CL40-43	455.345	171974	3.12249	19.5931	1.23324	0.155526	1.55813	0.0221102	0.952294	0.611179		140.979	1.32796	146.779	2.12939	241.545	28.4021	140.979	1.32796	NA
JG-CL40-44	338.818	7018.01	1.85595	17.6323	2.42906	0.173332	2.7083	0.0221756	1.19771	0.442239		141.391	1.67502	162.306	4.06243	479.453	53.7004	141.391	1.67502	NA
JG-CL40-45	667.126	8769.71	15.842	20.6361	0.926707	0.168953	1.34408	0.0252977	0.973536	0.724313		161.051	1.54847	158.51	1.97254	120.697	21.8566	161.051	1.54847	NA
JG-CL40-46	111.395	2918.03	2.16962	22.7862	1.78072	0.15806	2.08672	0.0261326	1.08786	0.521326		166.298	1.78596	149.004	2.89193	NA	NA	166.298	1.78596	NA
JG-CL40-47	933.373	351181	91.6142	19.9646	0.982388	0.182968	1.42547	0.0265047	1.0329	0.724603		168.635	1.71925	170.611	2.23868	198.077	22.8218	168.635	1.71925	NA
JG-CL40-48	362.969	70673.6	2.74686	20.5348	0.954833	0.178042	1.47677	0.0265278	1.12656	0.762855		168.78	1.87674	166.374	2.26624	132.294	22.4601	168.78	1.87674	NA
JG-CL40-49	112.348	3856.74	2.03802	20.8373	1.84074	0.182575	2.14057	0.0276038	1.09257	0.51041		175.534	1.89195	170.274	3.35561	97.8158	43.5788	175.534	1.89195	NA
JG-CL40-50	214.153	13365.4	2.05066	20.3099	1.47038	0.193439	1.79261	0.0285062	1.02539	0.572011		181.192	1.83206	179.56	2.95027	158.136	34.4329	181.192	1.83206	NA
JG-CL40-51	93.2505	3354.12	1.43461	19.1926	3.46353	0.217415	3.5922	0.0302769	0.952819	0.265246		192.281	1.80504	199.756	6.514	288.944	79.1517	192.281	1.80504	NA
JG-CL40-52	57.3619	20207.4	1.83403	19.9711	2.6775	0.209582	2.88548	0.0303699	1.07564	0.372776		192.863	2.04378	193.201	5.07657	197.343	62.2248	192.863	2.04378	NA
JG-CL40-53	665.01	61977	1.60802	20.2169	0.940533	0.207572	1.64998	0.030449	1.35567	0.821626		193.357	2.58236	191.513	2.87983	168.82	21.9671	193.357	2.58236	NA
JG-CL40-54	233.097	31853	1.37434	19.2823	1.52602	0.218585	1.85387	0.0305821	1.05266	0.56782		194.19	2.01369	200.731	3.37656	278.31	34.9356	194.19	2.01369	NA
JG-CL40-55	108.15	7533.27	1.74629	20.6847	1.65941	0.21043	2.05629	0.0315823	1.21438	0.590566		200.444	2.39669	193.913	3.62982	115.181	39.1673	200.444	2.39669	NA
JG-CL40-56	229.553	7399.54	1.31885	18.5548	1.25425	0.23497	2.3719	0.0316342	2.01315	0.848749		200.768	3.97946	214.294	4.58232	365.642	28.2736	200.768	3.97946	NA
JG-CL40-57	485.151	15774.7	0.99872	19.4891	0.906344	0.232651	1.55106	0.0328993	1.2587	0.81151		208.668	2.58446	212.385	2.97253	253.802	20.8207	208.668	2.58446	NA
JG-CL40-58	706.398	72384.5	2.66442	20.1068	0.791281	0.230116	1.20328	0.0335721	0.90651	0.753365		212.866	1.89814	210.295	2.28559	181.564	18.4603	212.866	1.89814	NA
JG-CL40-59	109.446	9482.34	2.35695	18.5128	1.70561	0.255803	1.91584	0.034361	0.87255	0.45544		217.785	1.86854	231.279	3.96256	370.739	38.3941	217.785	1.86854	NA
JG-CL40-60	1446.2	28918.2	4.32583	18.6617	0.6041	0.258171	1.19247	0.034958	1.02813	0.862185		221.504	2.23868	233.192	2.48455	352.675	13.6269	221.504	2.23868	NA
JG-CL40-61	903.413	536384	1.20438	19.8144	0.812575	0.247256	1.40853	0.0355481	1.15052	0.816819		225.179	2.54599	224.345	2.83523	215.612	18.8271	225.179	2.54599	NA
JG-CL40-62	183.887	8772.43	1.78461	20.5047	1.13409	0.239511	1.59207	0.0356342	1.11737	0.701836		225.715	2.47842	218.02	3.12368	135.737	26.6362	225.715	2.47842	NA
JG-CL40-63	93.5203	11382.5	1.85149	20.1138	1.51203	0.244318	1.94672	0.0356565	1.22617	0.629864		225.853	2.7214	221.95	3.88115	180.747	35.2289	225.853	2.7214	NA
JG-CL40-64	728.358	30436.5	3.82825	19.8406	0.982365	0.252754	1.4398	0.0363867	1.05261	0.73108		230.397	2.38235	228.811	2.94962	212.525	22.7607	230.397	2.38235	NA
JG-CL40-65	166.518	26566.5	2.39661	19.2665	1.43265	0.262407	1.82449	0.0366832	1.12972	0.619199		232.241	2.57699	236.605	3.8508	280.185	32.7813	232.241	2.57699	NA
JG-CL40-66	861.131	329571	1.61868	19.618	0.788981	0.258233	1.40826	0.0367582	1.16649	0.828322		232.707	2.6661	233.242	2.9347	238.607	18.2048	232.707	2.6661	NA
JG-CL40-67	143.405	37149.4	1.24332	19.5145	1.78633	0.260742	2.08131	0.0369195	1.06812	0.513198		233.71	2.45161	235.265	4.37074	250.799	41.1091	233.71	2.45161	NA
JG-CL40-68	212.77	19083.4	1.36933	19.6239	1.18521	0.262155	1.67272	0.0373276	1.18037	0.705658		236.247	2.73811	236.402	3.52778	237.948	27.3163	236.247	2.73811	NA
JG-CL40-69	188.298	68001.4	2.4917	19.8665	1.0538	0.259348	1.40628	0.0373844	0.931194	0.66217		236.6	2.16326	234.141	2.94062	209.516	24.4521	236.6	2.16326	NA
JG-CL40-70	190.241	34563.3	2.68793	18.9649	1.45206	0.272355	1.64811	0.0374778	0.779615	0.473035		237.18	1.81549	244.575	3.58216	316.139	33.0189	237.18	1.81549	NA
JG-CL40-71	386.012	28509.9	1.33806	19.3727	1.12833	0.268017	1.70306	0.037674	1.27565	0.749036		238.399	2.9856	241.107	3.6551	267.544	25.8764	238.399	2.9856	NA
JG-CL40-72	470.841	97681.7	1.31111	19.7659	0.765535	0.263334	1.32167	0.0377668	1.07739	0.815174		238.976	2.52757	237.35	2.79733	221.265	17.7314	238.976	2.52757	NA
JG-CL40-73	100.826	8628.2	2.29244	19.9322	2.18614	0.262826	2.54724	0.0380111	1.30737	0.513252		240.493	3.08622	236.942	5.38305	201.898	50.7375	240.493	3.08622	NA
JG-CL40-74	115.068	5989.1	1.81572	11.1501	7.90314	0.471161	8.08804	0.0381186	1.71952	0.212601		241.161	4.0702	391.99	26.3075	1417.98	151.309	241.161	4.0702	NA
JG-CL40-75	93.4721	8097.23	1.70747	19.9702	1.67968	0.263212	1.97547	0.0381397	1.03978	0.526344		241.292	2.46252	237.252	4.17957	197.454	39.0351	241.292	2.46252	NA
JG-CL40-76	273.331	12433.1	2.37173	20.2492	0.801425	0.259839	1.20881	0.0381768	0.904953	0.748631		241.522	2.14522	234.537	2.5315	165.095	18.7084	241.522	2.14522	NA
JG-CL40-77	294.028	39414.6	2.0349	19.8543	0.899355	0.265314	1.70661	0.0382211	1.45041	0.849876		241.797	3.44208	238.94	3.63352	210.952	20.8221	241.797	3.44208	NA
JG-CL40-78	199.513	30926.6	2.46565	19.9782	0.960289	0.263808	1.53054	0.0382413	1.1918	0.778681		241.922	2.8298	237.731	3.24401	196.525	22.3312	241.922	2.8298	NA
JG-CL40-79	188.499	17507.9	2.08045	20.1038	0.97818	0.263184	1.34041	0.0383907	0.91644	0.683701		242.85	2.18418	237.23	2.83571	181.908	22.7955	242.85	2.18418	NA
JG-CL40-80	203.25	8996.87	2.10103	20.2845	1.07882	0.261834	1.4994	0.0385371	1.04131	0.694489		243.759	2.49091	236.144	3.15917	161.044	25.2143	243.759	2.49091	NA
JG-CL40-81	803.275	38007.4	2.7711	19.5722	0.800041	0.274185	1.40963	0.0389377	1.16059	0.823335		246.245	2.80401	246.034	3.07997	244.036	18.4369	246.245	2.80401	NA
JG-CL40-82	228.179	10536.3	1.0834	20.3353	1.16871	0.263915	1.59776	0.0389405	1.08947	0.681874		246.262	2.63236	237.817	3.38758	155.211	27.3431	246.262	2.63236	NA
JG-CL40-83	113.198	7558.78	2.93737	20.0118	1.3123	0.269465	3.64219	0.0391269	3.39756	0.932835		247.419	8.24693	242.266	7.85022	192.634	30.513	247.419	8.24693	NA
JG-CL40-84	343.25	44315.2	2.24879	18.5164	0.80364	0.294875	1.42493	0.039617	1.17669	0.825786		250.458	2.8906	262.389	3.29486	370.31	18.0798	250.458	2.8906	NA
JG-CL40-85	226.079	270284	1.62199	19.4939	1.14819	0.280159	1.66482	0.0396271	1.20551	0.724112		250.521	2.96213	250.784	3.69947	253.239	26.4249	250.521	2.96213	NA
JG-CL40-86	243.619	15275.6	1.22378	19.871	1.09893	0.274845	1.55443	0.0396274	1.09937	0.707248		250.523	2.70134	246.56	3.40278	209.013	25.5013	250.523	2.70134	NA
JG-CL40-87	366.775	39828.5	2.56431	18.0978	2.23687	0.302298	2.531	0.0396962	1.18422	0.467888		250.95	2.9147	268.194	5.96557	421.579	49.9357	250.95	2.9147	NA
JG-CL40-88	88.9988	11416.3	1.07455	20.6206	1.77039	0.266634	2.06831	0.0398938	1.06941	0.517044		252.175	2.64471	239.999	4.42092	122.449	41.7069	252.175	2.64471	NA
JG-CL40-89	204.946	15112	1.53388	20.0555	1.11707	0.274813	1.53201	0.0399907	1.04843	0.684348		252.775	2.59888	246.534	3.35338	187.51	26.0238	252.775	2.59888	NA
JG-CL40-90	283.103	13552.8	1.75682	19.8373	0.893717	0.27821	1.40141	0.0400446	1.07945	0.770262		253.109	2.67925	249.237	3.09719	212.917	20.7059	253.109	2.67925	NA
JG-CL40-91	537.263	43581.7	1.6443	19.2163	0.758335	0.289017	1.23224	0.0402977	0.971254	0.788204		254.678	2.42534	257.785	2.80537	286.129	17.3433	254.678	2.42534	NA
JG-CL40-92	128.682	13970.7	1.91183	19.4219	1.20226	0.286906	1.55134	0.0404315	0.980429	0.631988		255.507	2.45607	256.121	3.51181	261.75	27.604	255.507	2.45607	NA
JG-CL40-93	157.113	126863	2.26341	19.7066	1.2086	0.282764	1.50137	0.0404318	0.89073	0.593276		255.509	2.23138	252.848	3.36045	228.242	27.9045	255.509	2.23138	NA
JG-CL40-94	85.5308	8398.37	2.56792	20.4421	1.37604	0.275559	1.66884	0.0408721	0.944216	0.565793		258.236	2.39012	247.128	3.66066	142.936	32.271	258.236	2.39012	NA
JG-CL40-95	193.829	44018.6	2.1119	19.5728	1.13206	0.28881	1.66084	0.0410161	1.21524	0.731704		259.128	3.08658	257.623	3.77905	243.942	26.0762	259.128	3.08658	NA
JG-CL40-96	645.231	55526.1	1.92648	19.4129	0.738673	0.291899	1.2671	0.041116	1.02952	0.8125		259.747	2.62099	260.053	2.90702	262.833	16.9772	259.747	2.62099	NA
JG-CL40-97	203.601	23481	2.15465	19.4135	1.12307	0.2923	1.57056	0.0411738	1.0979	0.699048		260.105	2.79884	260.369	3.60705	262.743	25.7862	260.105	2.79884	NA
JG-CL40-98	364.327	38134.6	2.12596	19.6668	0.779702	0.289345	1.46257	0.0412894	1.23741	0.84605		260.82	3.16299	258.044	3.33269	232.919	17.9943	260.82	3.16299	NA
JG-CL40-99	78.4649	25785.9	1.88329	19.8197	1.46205	0.287462	1.99024	0.0413395	1.35035	0.678488		261.131	3.45572	256.559	4.51215	215.006	33.8651	261.131	3.45572	NA
JG-CL40-100	136.895	74308.9	2.34287	19.3349	1.20961	0.295995	1.67756	0.0415253	1.16234	0.692878		262.281	2.98742	263.267	3.89037	272.031	27.7487	262.281	2.98742	NA
JG-CL40-101	381.747	48983.2	1.72502	19.8036	0.963873	0.289295	1.46248	0.0415694	1.09991	0.752085		262.554	2.82984	258.004	3.33205	216.868	22.3103	262.554	2.82984	NA
JG-CL40-102	54.2132	61845.5	2.04609	15.6036	4.3323	0.367872	4.68006	0.0416494	1.77035	0.378276		263.049	4.56315	318.075	12.7807	743.59	91.6289	263.049	4.56315	NA
JG-CL40-103	131.802	10604.5	4.31236	19.9554	1.1298	0.287672	3.62989	0.041653	3.44958	0.950329		263.071	8.89219	256.725	8.23427	199.168	26.2642	263.071	8.89219	NA
JG-CL40-104	1017.23	67061.6	1.1192	19.3138	0.703967	0.297786	1.35151	0.0417309	1.15369	0.853633		263.553	2.97928	264.669	3.14885	274.537	16.125	263.553	2.97928	NA
JG-CL40-105	359.637	203327	2.21116	19.2342	0.907721	0.300431	1.69497	0.0419282	1.43142	0.84451		264.774	3.71324	266.737	3.97604	284.027	20.7527	264.774	3.71324	NA
JG-CL40-106	154.746	8105.23	2.32214	19.5807	1.24032	0.297051	1.57633	0.0422034	0.972844	0.617156		266.476	2.53955	264.095	3.66568	243.043	28.5681	266.476	2.53955	NA
JG-CL40-107	126.314	22366.2	1.78759	16.7008	2.47901	0.350438	2.59233	0.0424655	0.758076	0.29243		268.097	1.9907	305.051	6.83067	598.195	53.7098	268.097	1.9907	NA
JG-CL40-108	992.995	57318.3	1.9012	19.4229	0.611157	0.302104	1.16989	0.0425753	0.997566	0.852698		268.776	2.62609	268.042	2.75606	261.635	14.0161	268.776	2.62609	NA
JG-CL40-109	35.2864	2669.31	4.04084	21.5418	2.26772	0.272883	2.46581	0.0426526	0.96834	0.392706		269.254	2.55359	244.996	5.36761	18.5411	54.4527	269.254	2.55359	NA
JG-CL40-110	111.272	5253.83	0.833639	20.2691	1.14537	0.29315	1.59011	0.0431135	1.10298	0.693654		272.103	2.9388	261.036	3.66016	162.796	26.8039	272.103	2.9388	NA
JG-CL40-111	426.618	29700.1	4.54645	19.5661	0.813505	0.303889	1.40128	0.0431427	1.14096	0.814228		272.283	3.04195	269.433	3.31612	244.716	18.7263	272.283	3.04195	NA
JG-CL40-112	61.7887	21509	1.58469	19.3381	1.6504	0.310569	1.95734	0.0435773	1.05231	0.537622		274.969	2.83268	274.622	4.70974	271.645	37.8283	274.969	2.83268	NA
JG-CL40-113	668.951	296283	4.62884	19.178	0.727531	0.314265	1.53736	0.0437308	1.35432	0.880937		275.917	3.65795	277.481	3.73267	290.668	16.6206	275.917	3.65795	NA
JG-CL40-114	402.507	325882	2.45954	18.9094	0.898362	0.324439	1.45975	0.0445143	1.15057	0.788197		280.754	3.16093	285.312	3.63087	322.836	20.4249	280.754	3.16093	NA
JG-CL40-115	298.621	98331.9	3.49764	19.0608	0.865171	0.323228	1.50777	0.0447031	1.23485	0.818991		281.919	3.40626	284.383	3.73975	304.688	19.7362	281.919	3.40626	NA
JG-CL40-116	113.736	16086	5.31119	19.9608	1.37502	0.311638	1.7966	0.0451352	1.15632	0.643617		284.585	3.21915	275.45	4.33431	198.555	31.9411	284.585	3.21915	NA
JG-CL40-117	769.953	51196.9	6.28519	19.4979	0.67008	0.322686	1.10727	0.0456516	0.881501	0.796102		287.77	2.4809	283.966	2.74289	252.76	15.4037	287.77	2.4809	NA
JG-CL40-118	699.544	126088	3.95094	18.5915	0.74434	0.362128	3.62455	0.04885	3.5473	0.978686		307.457	10.6504	313.802	9.78457	361.18	16.7748	307.457	10.6504	NA
JG-CL40-119	335.173	20869.2	3.5436	19.2	0.981862	0.364291	1.74871	0.0507503	1.44704	0.827491		319.126	4.50544	315.414	4.74124	288.072	22.4305	319.126	4.50544	NA
JG-CL40-120	250.322	54424.9	2.05328	19.0256	0.65717	0.379254	1.35474	0.0523548	1.18467	0.874465		328.963	3.79937	326.489	3.78246	308.89	14.9499	328.963	3.79937	NA
JG-CL40-121	475.927	179062	3.45866	18.7686	0.592198	0.390965	1.08707	0.0532424	0.911605	0.838589		334.397	2.97067	335.074	3.10249	339.796	13.3893	334.397	2.97067	NA
JG-CL40-122	486.678	1.15398e+06	5.69389	18.711	0.595716	0.394724	1.21774	0.0535895	1.06208	0.872172		336.521	3.48243	337.815	3.49938	346.704	13.4624	336.521	3.48243	NA
JG-CL40-123	215.314	74300.8	2.76568	18.6631	0.876466	0.399679	1.58559	0.0541232	1.32132	0.833333		339.786	4.3734	341.416	4.59734	352.547	19.793	339.786	4.3734	NA
JG-CL40-124	1013.92	1.65135e+06	1.11264	18.7388	0.654123	0.399679	1.1271	0.0543428	0.91786	0.814359		341.129	3.04968	341.415	3.26795	343.377	14.8015	341.129	3.04968	NA
JG-CL40-125	258.711	69805.1	1.83594	18.6668	0.739532	0.40773	1.26016	0.0552242	1.02034	0.80969		346.516	3.44228	347.239	3.70603	352.057	16.6974	346.516	3.44228	NA
JG-CL40-126	173.378	79861.1	1.92942	17.8403	0.954045	0.442131	1.46357	0.0572323	1.10988	0.758338		358.772	3.87317	371.754	4.55609	453.514	21.1828	358.772	3.87317	NA
JG-CL40-127	398.523	53115.4	1.88577	18.6563	0.829649	0.425953	1.41984	0.05766	1.15223	0.811519		361.379	4.04934	360.299	4.30654	353.331	18.7432	361.379	4.04934	NA
JG-CL40-128	157.202	36961	1.87696	18.705	1.01512	0.42523	1.40651	0.0577125	0.973549	0.692173		361.699	3.42435	359.784	4.26103	347.433	22.9381	361.699	3.42435	NA
JG-CL40-129	641.528	64549.8	4.14408	18.8102	0.620617	0.424562	1.22343	0.0579457	1.05433	0.861783		363.12	3.72265	359.308	3.70228	334.753	14.067	363.12	3.72265	NA
JG-CL40-130	879.031	237104	6.57543	18.271	0.728111	0.438085	1.18865	0.0580777	0.939543	0.790429		363.925	3.32451	368.901	3.67671	400.271	16.3138	363.925	3.32451	NA
JG-CL40-131	1197.43	173775	1.15305	18.1345	0.560407	0.449802	1.09344	0.0591855	0.938914	0.858677		370.67	3.3821	377.141	3.44461	417.052	12.5187	370.67	3.3821	NA
JG-CL40-132	2333.31	24496.9	23.4154	16.1664	0.708598	0.504562	1.3903	0.0591855	1.19617	0.860368		370.67	4.30878	414.786	4.73419	668.229	15.1891	370.67	4.30878	NA
JG-CL40-133	321.731	32114.7	4.04952	18.6921	0.902713	0.439429	1.48136	0.0595983	1.17453	0.792876		373.182	4.25869	369.85	4.59189	349.027	20.3942	373.182	4.25869	NA
JG-CL40-134	344.791	34427	3.91093	18.6503	0.633092	0.463472	1.30065	0.0627189	1.13617	0.873542		392.139	4.32258	386.67	4.18247	354.053	14.2788	392.139	4.32258	NA
JG-CL40-135	539.402	47432.5	4.77411	13.6984	0.863414	0.660145	1.69734	0.065614	1.46133	0.860952		409.677	5.80048	514.702	6.85329	1013.09	17.5002	409.677	5.80048	40.4385
JG-CL40-136	539.4	44933.8	9.35396	17.3399	0.685407	0.523182	1.64101	0.0658244	1.49101	0.908597		410.95	5.9361	427.275	5.7233	516.29	15.0519	410.95	5.9361	79.5968
JG-CL40-137	202.382	50319.8	3.2563	18.297	0.893506	0.496806	1.5321	0.065956	1.24458	0.812336		411.746	4.96429	409.538	5.16348	397.09	20.0306	411.746	4.96429	103.691
JG-CL40-138	507.019	183624	3.06134	17.9819	0.628679	0.537501	1.32543	0.0701299	1.16684	0.880352		436.938	4.92944	436.776	4.70493	435.897	13.9987	436.938	4.92944	100.239
JG-CL40-139	861.962	177557	4.91695	17.766	0.6479	0.549152	1.30433	0.0707896	1.13203	0.867905		440.911	4.8244	444.441	4.69482	462.781	14.3594	440.911	4.8244	95.2742
JG-CL40-140	614.132	273789	7.5078	17.9471	0.69039	0.54637	1.7235	0.071149	1.57918	0.916264		443.074	6.7619	442.616	6.18329	440.214	15.3612	443.074	6.7619	100.65
JG-CL40-141	343.705	223775	10.8494	17.7932	0.826442	0.560077	1.92803	0.0723086	1.74192	0.903472		450.049	7.57211	451.576	7.02832	459.349	18.3279	450.049	7.57211	97.9754
JG-CL40-142	238.442	60813.7	4.17733	17.9095	0.840767	0.559816	1.41633	0.0727473	1.13978	0.804743		452.686	4.98264	451.407	5.16143	444.873	18.7014	452.686	4.98264	101.756
JG-CL40-143	469.182	73341.4	3.25775	17.9133	0.826921	0.560658	1.34405	0.0728723	1.05956	0.788335		453.437	4.63937	451.955	4.90274	444.4	18.4069	453.437	4.63937	102.034
JG-CL40-144	461.288	78513.5	2.40854	16.5399	1.13873	0.611078	1.61787	0.0733358	1.14926	0.710354		456.222	5.06195	484.24	6.23103	619.118	24.5932	456.222	5.06195	73.689
JG-CL40-145	317.408	76226.1	5.95581	17.635	0.789561	0.573373	1.54566	0.0733668	1.32878	0.859686		456.408	5.85496	460.194	5.71946	479.115	17.4711	456.408	5.85496	95.2606
JG-CL40-146	432.773	74282.2	6.06302	17.4994	0.739204	0.582633	1.21235	0.0739786	0.960928	0.792613		460.081	4.26697	466.152	4.53187	496.171	16.2936	460.081	4.26697	92.7264
JG-CL40-147	299.029	57690.6	3.14699	17.8479	0.879381	0.572532	1.27886	0.0741438	0.928531	0.726062		461.072	4.13169	459.651	4.72777	452.53	19.5361	461.072	4.13169	101.888
JG-CL40-148	192.115	14849.8	1.6887	18.425	1.82467	0.56544	3.03867	0.0755928	2.42983	0.799638		469.763	11.0085	455.061	11.145	381.445	40.9989	469.763	11.0085	123.154
JG-CL40-149	203.663	16287.3	5.74235	17.9624	0.844132	0.58695	1.12165	0.0764984	0.738609	0.658502		475.188	3.38354	468.918	4.21238	438.317	18.7877	475.188	3.38354	108.412
JG-CL40-150	315.775	20019.1	5.71094	17.3878	1.14944	0.611864	1.75643	0.0771948	1.3281	0.756132		479.357	6.13538	484.735	6.77009	510.236	25.2892	479.357	6.13538	93.948
JG-CL40-151	457.428	40445.2	2.74745	16.9359	1.16726	0.628762	1.80538	0.0772648	1.37728	0.762875		479.776	6.36796	495.324	7.07676	567.874	25.4088	479.776	6.36796	84.4863
JG-CL40-152	233.855	22793.2	4.79767	17.0033	0.884531	0.627084	1.36038	0.0773656	1.03356	0.759757		480.379	4.78453	494.278	5.32367	559.2	19.2852	480.379	4.78453	85.9046
JG-CL40-153	84.1875	15302.5	2.35725	17.5896	1.29974	0.611173	1.89984	0.0780024	1.38566	0.729358		484.188	6.46344	484.3	7.31772	484.811	28.7131	484.188	6.46344	99.8715
JG-CL40-154	216.466	30774.3	5.64816	17.7025	0.801555	0.607836	1.36648	0.0780743	1.1067	0.809889		484.618	5.16663	482.194	5.24544	470.694	17.7593	484.618	5.16663	102.958
JG-CL40-155	56.8917	10435	2.79977	18.0425	1.4241	0.607764	1.64773	0.0795645	0.828823	0.50301		493.523	3.93778	482.149	6.3246	428.402	31.7516	493.523	3.93778	115.201
JG-CL40-156	333.724	206009	2.63104	17.4878	0.935019	0.629838	1.76341	0.0799192	1.49512	0.847853		495.64	7.13268	495.995	6.91952	497.612	20.5991	495.64	7.13268	99.6037
JG-CL40-157	239.935	73449.1	3.08467	17.5493	0.797881	0.635362	1.53027	0.0809037	1.3058	0.853312		501.515	6.30051	499.431	6.03684	489.887	17.6185	501.515	6.30051	102.373
JG-CL40-158	75.5706	36090.6	1.49091	17.4735	1.18769	0.644749	1.55573	0.0817446	1.00484	0.645892		506.527	4.89494	505.242	6.19244	499.448	26.1783	506.527	4.89494	101.417
JG-CL40-159	98.638	19387.2	3.84768	17.5242	1.23222	0.646857	1.55219	0.0822497	0.943889	0.608103		509.537	4.6243	506.542	6.19058	493.042	27.168	509.537	4.6243	103.346
JG-CL40-160	669.938	64279.8	1.53587	17.2068	0.621589	0.66984	1.20204	0.0836293	1.02884	0.855917		517.749	5.11854	520.615	4.89607	533.209	13.6108	517.749	5.11854	97.1007
JG-CL40-161	423.758	673897	1.33718	17.2915	0.683701	0.674921	1.23912	0.0846784	1.03343	0.834002		523.987	5.20082	523.7	5.06999	522.426	14.9942	523.987	5.20082	100.299
JG-CL40-162	525.052	78783.8	5.00724	17.5622	0.790391	0.670001	1.5144	0.0853772	1.29177	0.852995		528.139	6.55037	520.713	6.16926	488.286	17.442	528.139	6.55037	108.162
JG-CL40-163	198.329	68240.6	1.41811	17.3835	0.980513	0.685966	1.3535	0.0865225	0.933037	0.689351		534.938	4.78969	530.374	5.59174	510.807	21.5568	534.938	4.78969	104.724
JG-CL40-164	804.044	76077.9	1.57913	16.9845	0.700915	0.702544	1.43936	0.0865793	1.25717	0.873422		535.275	6.45749	540.309	6.03085	561.587	15.287	535.275	6.45749	95.3146
JG-CL40-165	265.434	58952.6	5.26605	17.5843	0.595788	0.690477	1.39322	0.0880969	1.2594	0.903952		544.272	6.57319	533.087	5.77822	485.476	13.1531	544.272	6.57319	112.111
JG-CL40-166	921.119	145695	47.4544	16.8687	0.604577	0.721353	1.10241	0.0882912	0.92184	0.836206		545.423	4.8211	551.465	4.69087	576.52	13.1505	545.423	4.8211	94.6061
JG-CL40-167	1119.7	1.67275e+06	6.34612	16.8027	0.545276	0.744244	1.12231	0.0907364	0.980944	0.874041		559.891	5.26047	564.879	4.86244	585.037	11.8421	559.891	5.26047	95.7018
JG-CL40-168	549.96	103079	7.34418	16.9518	0.716673	0.741099	1.68646	0.091155	1.5266	0.905213		562.365	8.22126	563.046	7.28895	565.823	15.6072	562.365	8.22126	99.3887
JG-CL40-169	277.474	70637.7	1.47782	17.1674	0.665208	0.736366	1.22214	0.0917244	1.02524	0.838892		565.727	5.55286	560.282	5.26268	538.207	14.5536	565.727	5.55286	105.113
JG-CL40-170	302.701	161269	12.595	17.1651	0.691563	0.745088	1.40859	0.0927985	1.22713	0.871181		572.066	6.71755	565.37	6.10673	538.499	15.1388	572.066	6.71755	106.234
JG-CL40-171	92.4661	327347	0.774911	16.8968	0.943038	0.77086	1.37302	0.0945077	0.997934	0.726815		582.141	5.5548	580.256	6.06882	572.894	20.5073	582.141	5.5548	101.614
JG-CL40-172	262.109	33967.8	3.20286	16.5511	0.809277	0.798044	1.25126	0.0958388	0.954312	0.762684		589.976	5.38026	595.724	5.63906	617.652	17.4903	589.976	5.38026	95.5192
JG-CL40-173	788.717	163039	6.90591	15.6959	0.585477	0.86602	1.1262	0.0986283	0.962052	0.854246		606.365	5.5676	633.404	5.30715	731.147	12.404	606.365	5.5676	82.9334
JG-CL40-174	237.112	34733.2	5.10943	15.6595	0.836282	0.868061	1.3598	0.0986317	1.07224	0.788525		606.385	6.20544	634.514	6.41608	736.02	17.704	606.385	6.20544	82.387
JG-CL40-175	428.279	258502	21.5351	16.2401	0.649428	0.839267	1.39165	0.0988956	1.23083	0.884437		607.933	7.14061	618.741	6.44794	658.49	13.9121	607.933	7.14061	92.3224
JG-CL40-176	595.294	1.35991e+06	5.14607	16.4374	0.625602	0.857407	1.28342	0.10226	1.12062	0.873152		627.641	6.70194	628.706	6.01568	632.56	13.4927	627.641	6.70194	99.2224
JG-CL40-177	121.978	20586.5	1.86873	16.9626	1.00632	0.836128	1.39365	0.102909	0.964154	0.691818		631.432	5.79932	617.006	6.44407	564.405	21.9038	631.432	5.79932	111.876
JG-CL40-178	406.237	88363.1	3.64715	16.5517	0.603966	0.868081	1.23795	0.104253	1.08062	0.872914		639.287	6.5768	634.525	5.84121	617.577	13.0581	639.287	6.5768	103.515
JG-CL40-179	153.475	90527.6	5.29533	16.318	0.828732	0.891532	1.05657	0.105558	0.655391	0.620302		646.9	4.03394	647.192	5.05654	648.21	17.7795	646.9	4.03394	99.7979
JG-CL40-180	810.45	178081	6.11378	14.3414	0.729544	1.06111	1.58806	0.110418	1.41057	0.888233		675.177	9.04205	734.373	8.3017	919.487	15.0008	675.177	9.04205	73.4297
JG-CL40-181	408.711	69284.8	4.85883	15.111	0.866399	1.05047	1.51756	0.115177	1.24593	0.821009		702.742	8.29532	729.115	7.89432	811.089	18.1223	702.742	8.29532	86.6417
JG-CL40-182	149.079	65233	2.37048	14.5804	0.865339	1.12737	1.54575	0.119268	1.28084	0.828617		726.35	8.79839	766.499	8.3177	885.366	17.8685	726.35	8.79839	82.0396
JG-CL40-183	649.235	180081	3.65906	15.6207	0.776834	1.06324	1.21039	0.120509	0.928214	0.76687		733.494	6.43534	735.421	6.33351	741.276	16.4318	733.494	6.43534	98.9502
JG-CL40-184	87.4861	18533.1	3.62781	15.5099	1.12476	1.11174	1.59354	0.125113	1.12884	0.708388		759.924	8.09204	759.012	8.51856	756.308	23.714	759.924	8.09204	100.478
JG-CL40-185	274.944	77354	5.59677	14.5244	0.761299	1.20119	1.41495	0.126589	1.19269	0.842919		768.376	8.63921	801.133	7.84029	893.337	15.7107	768.376	8.63921	86.0118
JG-CL40-186	291.102	87119	5.90972	14.6922	0.576673	1.27416	1.30472	0.135831	1.17036	0.897021		821.044	9.02244	834.251	7.42266	869.589	11.9701	821.044	9.02244	94.4175
JG-CL40-187	354.721	76805.5	3.84718	14.3462	0.684648	1.39531	1.54953	0.145243	1.39007	0.897093		874.241	11.3646	886.948	9.16538	918.794	14.0793	874.241	11.3646	95.1509
JG-CL40-188	105.368	67045.9	4.29236	13.8759	0.659109	1.45379	1.16237	0.14637	0.957437	0.823692		880.58	7.88052	911.443	6.99273	986.948	13.392	986.948	13.392	89.2226
JG-CL40-189	204.414	64687.7	3.97566	13.7731	0.684801	1.73147	1.25864	0.173036	1.05605	0.839035		1028.81	10.0421	1020.3	8.10141	1002.05	13.8841	1002.05	13.8841	102.671
JG-CL40-190	612.691	100213	2.27824	13.7709	0.607777	1.59137	1.37973	0.159009	1.23865	0.89775		951.265	10.9547	966.833	8.60349	1002.38	12.327	1002.38	12.327	94.9008
JG-CL40-191	228.781	350037	3.9654	13.7303	0.617396	1.60798	1.37558	0.160195	1.22925	0.893619		957.86	10.9415	973.324	8.61199	1008.37	12.5225	1008.37	12.5225	94.9906
JG-CL40-192	369.558	49324.1	2.94369	13.6682	0.661151	1.73328	1.37069	0.171898	1.20069	0.875979		1022.56	11.3535	1020.97	8.826	1017.55	13.3912	1017.55	13.3912	100.492
JG-CL40-193	12.4928	12895.6	3.35932	13.6381	2.36242	1.67832	2.81839	0.166079	1.53698	0.545341		990.47	14.1115	1000.34	17.9345	1022.03	47.8421	1022.03	47.8421	96.9123
JG-CL40-194	105.569	51495.1	4.61542	13.6056	0.774695	1.69398	1.52226	0.16723	1.31039	0.86082		996.831	12.1026	1006.27	9.71957	1026.85	15.6696	1026.85	15.6696	97.0769
JG-CL40-195	210.074	62580.8	6.39254	13.5362	0.798744	1.7985	1.57543	0.176642	1.35793	0.861945		1048.6	13.1416	1044.92	10.2808	1037.19	16.1487	1037.19	16.1487	101.1
JG-CL40-196	374.756	204011	2.08502	13.5301	0.767619	1.86679	1.38716	0.183267	1.15541	0.832931		1084.8	11.536	1069.39	9.17205	1038.09	15.5184	1038.09	15.5184	104.5
JG-CL40-197	460.925	159950	5.17972	13.4327	0.580892	1.80956	1.58493	0.176369	1.47464	0.930415		1047.11	14.2523	1048.92	10.3655	1052.71	11.7228	1052.71	11.7228	99.4683
JG-CL40-198	235.524	42614.1	2.28905	13.2861	0.697204	1.67242	1.25615	0.161224	1.0449	0.831827		963.577	9.35204	998.105	7.98214	1074.77	13.9814	1074.77	13.9814	89.6541
JG-CL40-199	210.261	84031.6	3.96127	13.273	0.715357	1.94744	1.05402	0.187551	0.774095	0.734421		1108.1	7.88098	1097.56	7.07139	1076.73	14.3611	1076.73	14.3611	102.913
JG-CL40-200	147.523	79186.3	2.14323	13.1739	0.710021	1.78593	1.07196	0.170713	0.803101	0.749188		1016.04	7.54925	1040.34	6.97766	1091.79	14.2213	1091.79	14.2213	93.0619
JG-CL40-201	389.056	127057	9.53135	13.1041	0.811114	1.77021	1.33672	0.168314	1.06251	0.79486		1002.81	9.86758	1034.6	8.67349	1102.4	16.2394	1102.4	16.2394	90.966
JG-CL40-202	99.5278	27892.5	2.95257	12.4303	0.846565	2.28321	1.24645	0.205928	0.914853	0.733969		1207.09	10.0708	1207.11	8.8016	1207.15	16.6525	1207.15	16.6525	99.9947
JG-CL40-203	102.99	6473.35	2.25018	10.9914	4.00008	0.989894	4.10193	0.0789461	0.908382	0.221452		489.829	4.28467	698.666	20.7223	1445.34	76.2176	1445.34	76.2176	33.8904
JG-CL40-204	132.564	166274	2.32592	10.9195	0.844447	3.10608	1.35096	0.246096	1.05451	0.780567		1418.31	13.4253	1434.2	10.377	1457.83	16.0574	1457.83	16.0574	97.2892
JG-CL40-205	166.483	467779	2.18066	8.73908	0.697671	5.36277	1.19657	0.34005	0.972132	0.812431		1886.91	15.9025	1878.93	10.2406	1870.1	12.5866	1870.1	12.5866	100.899
JG-CL40-206	337.41	130258	3.21517	5.75542	0.605382	9.76572	1.53396	0.40782	1.40945	0.91883		2204.95	26.3203	2412.92	14.1297	2593.35	10.0957	2593.35	10.0957	85.023
JG-WU82
JG-WU82-1	378.8	18405.1	67.5924	20.8912	1.09958	0.120258	2.08181	0.0182291	1.76773	0.849131		116.454	2.04012	115.306	2.26918	91.6936	26.0529	116.454	2.04012	NA
JG-WU82-2	535.283	31912.9	47.1136	20.7018	0.822709	0.121927	1.54771	0.0183144	1.31094	0.847017		116.994	1.51989	116.817	1.70786	113.188	19.4295	116.994	1.51989	NA
JG-WU82-3	1350.79	80283.3	23.975	19.7395	0.73512	0.130119	1.56208	0.0186365	1.37829	0.882345		119.033	1.62556	124.204	1.8262	224.383	16.992	119.033	1.62556	NA
JG-WU82-4	183.648	6374.21	45.853	21.4135	1.3507	0.129265	1.89783	0.0200843	1.33318	0.702475		128.189	1.6921	123.437	2.20583	32.8551	32.3639	128.189	1.6921	NA
JG-WU82-5	383.799	32937.3	279.799	20.4002	0.974629	0.135956	1.83198	0.0201243	1.55121	0.846739		128.442	1.97268	129.436	2.22633	147.711	22.8527	128.442	1.97268	NA
JG-WU82-6	423.204	26436.7	107.831	20.6271	0.828506	0.139338	1.54317	0.0208542	1.3019	0.843654		133.053	1.71445	132.454	1.91628	121.738	19.5359	133.053	1.71445	NA
JG-WU82-7	543.045	56025.5	101.762	19.3202	0.822448	0.18634	1.65836	0.0261218	1.44005	0.868356		166.23	2.3632	173.501	2.64488	273.776	18.8418	166.23	2.3632	NA
JG-WU82-8	99.4502	6777.57	40.699	20.8539	1.9916	0.176326	2.22619	0.0266803	0.994708	0.446822		169.738	1.66636	164.894	3.38829	95.9269	47.1511	169.738	1.66636	NA
JG-WU82-9	325.886	32851.1	506.295	19.8485	0.90365	0.186397	1.75571	0.0268444	1.5053	0.857375		170.768	2.53683	173.55	2.80087	211.609	20.9179	170.768	2.53683	NA
JG-WU82-10	408.415	168162	61.9783	20.2139	0.7716	0.183767	1.63616	0.0269529	1.4428	0.881817		171.449	2.44106	171.297	2.57904	169.167	18.0092	171.449	2.44106	NA
JG-WU82-11	56.79	6681.94	72.0008	21.0159	2.13555	0.178327	2.40118	0.0271927	1.09777	0.457177		172.954	1.87339	166.62	3.68984	77.5306	50.7565	172.954	1.87339	NA
JG-WU82-12	275.528	27889.2	61.9435	19.1651	1.52789	0.196174	2.21354	0.0272798	1.60166	0.723574		173.501	2.74183	181.884	3.6861	292.24	34.9037	173.501	2.74183	NA
JG-WU82-13	325.131	10510.5	40.0157	20.4817	1.02677	0.183647	1.80457	0.0272921	1.48399	0.822349		173.578	2.54151	171.194	2.84294	138.375	24.0983	173.578	2.54151	NA
JG-WU82-14	233.525	71025.7	38.142	19.8005	0.963377	0.19701	1.79138	0.0283043	1.51028	0.843082		179.927	2.67982	182.593	2.9937	217.262	22.2894	179.927	2.67982	NA
JG-WU82-15	340.808	118016	46.326	19.7503	0.855339	0.197562	1.63076	0.0283116	1.38844	0.851408		179.973	2.46426	183.061	2.73166	223.114	19.8025	179.973	2.46426	NA
JG-WU82-16	175.482	11732.4	45.1791	20.2894	1.21609	0.193217	1.72689	0.0284447	1.22607	0.709991		180.807	2.18602	179.37	2.83936	160.462	28.4338	180.807	2.18602	NA
JG-WU82-17	120.315	3088.5	46.089	11.496	3.77683	0.347186	4.37625	0.0289598	2.21068	0.505153		184.034	4.01088	302.602	11.4521	1359.35	72.8154	184.034	4.01088	NA
JG-WU82-18	168.396	6833.25	51.4588	20.6703	1.09129	0.196607	1.6429	0.0294873	1.22809	0.747512		187.338	2.26758	182.251	2.74089	116.797	25.7421	187.338	2.26758	NA
JG-WU82-19	253.826	63019.7	35.4768	20.272	1.0167	0.206246	1.61505	0.0303368	1.25487	0.776987		192.656	2.38181	190.397	2.80392	162.46	23.7741	192.656	2.38181	NA
JG-WU82-20	61.7052	2109.8	43.5113	22.9684	2.0531	0.183083	2.27694	0.0305117	0.984509	0.432382		193.75	1.87911	170.71	3.57781	NA	NA	193.75	1.87911	NA
JG-WU82-21	63.4983	6656.17	36.1249	20.6229	1.83406	0.208694	2.17492	0.0312282	1.16898	0.537481		198.231	2.282	192.456	3.81301	122.22	43.2092	198.231	2.282	NA
JG-WU82-22	387.93	42216.6	99.0768	19.715	0.802899	0.224521	1.81982	0.0321174	1.63313	0.897411		203.787	3.27605	205.666	3.38806	227.228	18.5527	203.787	3.27605	NA
JG-WU82-23	194.675	9835.33	59.5293	19.6802	1.75365	0.226477	2.56006	0.0323402	1.8651	0.728539		205.178	3.76652	207.286	4.80008	231.305	40.473	205.178	3.76652	NA
JG-WU82-24	1277.07	161334	117.337	19.7016	0.778822	0.230103	1.57079	0.0328937	1.36412	0.868428		208.633	2.80044	210.284	2.98353	228.794	17.9887	208.633	2.80044	NA
JG-WU82-25	1346.88	107159	108.685	20.0856	0.684912	0.225834	1.46085	0.0329126	1.29034	0.88328		208.752	2.65045	206.754	2.73271	184.019	15.9522	208.752	2.65045	NA
JG-WU82-26	194.639	25500.1	39.092	19.7874	0.939523	0.23563	1.86786	0.0338303	1.61437	0.864289		214.476	3.40547	214.836	3.61674	218.769	21.7598	214.476	3.40547	NA
JG-WU82-27	221.135	31803.4	42.0217	19.935	0.82214	0.23522	1.4304	0.0340234	1.17053	0.818321		215.681	2.48284	214.499	2.76579	201.55	19.1091	215.681	2.48284	NA
JG-WU82-28	128.3	11548.9	36.6416	16.4807	2.49863	0.285451	2.72685	0.0341346	1.09204	0.400477		216.374	2.32368	254.972	6.14854	626.84	53.846	216.374	2.32368	NA
JG-WU82-29	490.883	20070.8	443.591	18.0149	0.812131	0.263727	1.77227	0.0344727	1.57524	0.888827		218.481	3.38394	237.666	3.75546	431.811	18.0964	218.481	3.38394	NA
JG-WU82-30	339.834	38461.3	39.0673	19.5771	1.01833	0.244607	1.75477	0.0347459	1.42906	0.814385		220.183	3.09341	222.186	3.50177	243.46	23.4743	220.183	3.09341	NA
JG-WU82-31	238.72	52025.6	44.3617	18.0312	1.77365	0.267337	2.42268	0.0349761	1.65033	0.681197		221.617	3.59525	240.562	5.18917	429.803	39.5372	221.617	3.59525	NA
JG-WU82-32	572.778	101458	134.032	19.6412	0.744161	0.246433	1.73106	0.0351199	1.56294	0.902882		222.513	3.41841	223.674	3.47514	235.909	17.1669	222.513	3.41841	NA
JG-WU82-33	93.5183	7844.14	59.21	20.2993	1.16474	0.239486	1.81483	0.0352736	1.39176	0.766879		223.47	3.05686	217.999	3.56046	159.344	27.2405	223.47	3.05686	NA
JG-WU82-34	246.45	29635.6	66.5138	19.6584	0.912701	0.250659	1.67766	0.0357536	1.40766	0.839064		226.458	3.13242	227.111	3.41412	233.907	21.0783	226.458	3.13242	NA
JG-WU82-35	457.051	56598	24.9869	19.4234	0.868644	0.256362	1.62448	0.03613	1.37273	0.845028		228.8	3.08573	231.731	3.36578	261.585	19.9568	228.8	3.08573	NA
JG-WU82-36	266.332	15659.4	63.5359	20.0018	0.963894	0.250591	1.91927	0.0363682	1.65967	0.86474		230.282	3.75446	227.056	3.90497	193.795	22.4287	230.282	3.75446	NA
JG-WU82-37	261.845	20668.6	40.3812	19.7697	1.04027	0.25572	1.65512	0.036682	1.28734	0.777796		232.234	2.93643	231.212	3.42242	220.818	24.072	232.234	2.93643	NA
JG-WU82-38	384.598	31224.3	40.4473	19.5202	0.872493	0.262366	1.9	0.0371603	1.68782	0.888329		235.207	3.89833	236.572	4.00966	250.128	20.0786	235.207	3.89833	NA
JG-WU82-39	219.654	23210.1	49.1508	19.9932	0.969659	0.257806	1.45017	0.0373993	1.0783	0.743574		236.692	2.50597	232.898	3.01807	194.799	22.5401	236.692	2.50597	NA
JG-WU82-40	171.444	3.01664e+06	49.4043	19.4009	1.07937	0.26679	1.71127	0.037556	1.32794	0.775995		237.666	3.09858	240.124	3.65945	264.246	24.7867	237.666	3.09858	NA
JG-WU82-41	216.217	53849.2	31.4062	19.5054	1.1529	0.265467	1.88287	0.0375709	1.48863	0.790617		237.759	3.47488	239.063	4.01063	251.916	26.5227	237.759	3.47488	NA
JG-WU82-42	160.344	18666.6	47.274	19.5404	0.961487	0.265559	1.60536	0.0376515	1.28558	0.800806		238.259	3.0071	239.137	3.42044	247.751	22.1159	238.259	3.0071	NA
JG-WU82-43	249.334	70180.5	50.559	19.6427	1.03937	0.2642	1.7912	0.0376549	1.45881	0.81443		238.281	3.4126	238.046	3.80095	235.737	24.0028	238.281	3.4126	NA
JG-WU82-44	140.22	26727.9	57.8288	19.6108	1.04225	0.266842	1.43105	0.0379696	0.980613	0.685242		240.236	2.31243	240.166	3.06067	239.484	24.0299	240.236	2.31243	NA
JG-WU82-45	358.974	66656.1	62.749	19.5791	1.00302	0.267606	1.67118	0.0380169	1.33672	0.799861		240.529	3.15594	240.778	3.58235	243.232	23.1076	240.529	3.15594	NA
JG-WU82-46	226.641	18777.6	55.065	19.4293	0.994262	0.270378	1.86024	0.0381167	1.57224	0.84518		241.149	3.72139	242.996	4.02012	260.891	22.8304	241.149	3.72139	NA
JG-WU82-47	446.492	49059.9	57.3107	19.6107	0.893618	0.267935	1.93173	0.0381249	1.71261	0.886568		241.2	4.0545	241.041	4.14488	239.491	20.6189	241.2	4.0545	NA
JG-WU82-48	245.16	11749.5	47.3961	19.6772	1.14289	0.267395	2.06244	0.0381773	1.71682	0.832421		241.525	4.06983	240.609	4.41831	231.657	26.389	241.525	4.06983	NA
JG-WU82-49	81.8611	7990.82	38.1753	20.1016	1.60773	0.262044	1.8522	0.0382203	0.919704	0.496547		241.792	2.18258	236.313	3.90499	182.161	37.4617	241.792	2.18258	NA
JG-WU82-50	259.155	268275	27.5715	19.4835	0.957584	0.270696	1.71083	0.038268	1.41774	0.828683		242.089	3.36854	243.25	3.70066	254.474	22.0413	242.089	3.36854	NA
JG-WU82-51	151.807	8143.92	43.7592	18.8253	1.47638	0.281156	1.91152	0.0384041	1.21417	0.635187		242.933	2.89474	251.574	4.25948	332.925	33.4757	242.933	2.89474	NA
JG-WU82-52	140.717	16392.4	73.7486	19.5263	1.33574	0.271683	1.70601	0.038492	1.06127	0.622075		243.479	2.53577	244.038	3.70082	249.425	30.7423	243.479	2.53577	NA
JG-WU82-53	234.934	789713	46.6832	19.5948	0.851135	0.270736	1.58178	0.0384923	1.33326	0.842889		243.481	3.1857	243.282	3.4219	241.367	19.6124	243.481	3.1857	NA
JG-WU82-54	374.506	186318	43.3377	18.4923	1.31544	0.288599	1.94937	0.0387233	1.43864	0.738		244.915	3.45735	257.456	4.43307	373.24	29.6131	244.915	3.45735	NA
JG-WU82-55	86.365	10841.6	54.7544	19.8645	1.18917	0.269146	1.64093	0.0387929	1.13072	0.689073		245.346	2.72206	242.011	3.53345	209.789	27.574	245.346	2.72206	NA
JG-WU82-56	223.566	48600.8	36.8376	19.5673	0.866485	0.273625	1.56682	0.0388486	1.30542	0.833167		245.692	3.14696	245.588	3.41794	244.603	19.9504	245.692	3.14696	NA
JG-WU82-57	181.791	35384.9	74.5836	19.5692	1.00417	0.276104	1.58576	0.0392043	1.22731	0.773957		247.899	2.98474	247.562	3.48382	244.366	23.1328	247.899	2.98474	NA
JG-WU82-58	99.9273	16491.6	54.5473	19.2813	1.32719	0.280382	1.73893	0.039226	1.12358	0.646134		248.034	2.73392	250.961	3.86655	278.432	30.3761	248.034	2.73392	NA
JG-WU82-59	48.9785	8688.61	16.3663	19.7996	2.23064	0.273179	2.49422	0.0392455	1.11597	0.447424		248.155	2.71672	245.232	5.43409	217.324	51.6434	248.155	2.71672	NA
JG-WU82-60	74.8642	9511.27	45.1585	13.4922	5.83966	0.404591	5.95625	0.0396083	1.17276	0.196896		250.405	2.88034	344.973	17.4226	1043.8	117.904	250.405	2.88034	NA
JG-WU82-61	140.147	28841.5	51.7928	18.7701	1.93986	0.29085	2.16337	0.0396117	0.957663	0.442671		250.426	2.35225	259.228	4.94947	339.615	43.9259	250.426	2.35225	NA
JG-WU82-62	190.276	58151.5	55.0089	19.0549	1.31533	0.287073	1.75137	0.0396905	1.15638	0.660268		250.914	2.84577	256.253	3.96644	305.412	29.9921	250.914	2.84577	NA
JG-WU82-63	86.4458	2436.87	41.7339	11.7341	6.35329	0.466778	6.49566	0.0397418	1.35251	0.208217		251.232	3.33257	388.961	20.9923	1319.73	123.236	251.232	3.33257	NA
JG-WU82-64	44.8374	8998.57	34.1788	19.6231	1.97472	0.279494	2.39172	0.0397949	1.34938	0.564186		251.562	3.32913	250.256	5.30492	238.045	45.5393	251.562	3.32913	NA
JG-WU82-65	506.622	63645.1	80.9437	19.6718	0.608095	0.27897	1.36472	0.0398189	1.22175	0.89524		251.71	3.016	249.84	3.02254	232.296	14.0387	251.71	3.016	NA
JG-WU82-66	66.2022	14314.4	42.5715	20.5045	1.33541	0.267735	1.84746	0.0398329	1.27663	0.69102		251.797	3.15255	240.881	3.96173	135.756	31.3777	251.797	3.15255	NA
JG-WU82-67	174.543	13260.9	48.444	19.8363	0.955265	0.278166	1.44074	0.0400362	1.07852	0.748588		253.057	2.67641	249.202	3.18372	213.077	22.1311	253.057	2.67641	NA
JG-WU82-68	110.949	23164.9	51.1725	19.0885	1.23824	0.289892	1.65982	0.0401511	1.10533	0.665936		253.769	2.7505	258.475	3.7877	301.369	28.2344	253.769	2.7505	NA
JG-WU82-69	231.599	68874.6	77.9275	19.4313	0.89018	0.285485	1.82819	0.0402507	1.59682	0.873447		254.387	3.983	255	4.12258	260.633	20.4533	254.387	3.983	NA
JG-WU82-70	131.227	108156	106.239	19.3264	1.07187	0.288995	1.67351	0.0405257	1.2852	0.767966		256.09	3.22675	257.768	3.80978	273.032	24.5558	256.09	3.22675	NA
JG-WU82-71	79.4643	7787.84	36.7785	20.2044	1.83437	0.277706	2.09612	0.0407117	1.01431	0.483897		257.243	2.55785	248.837	4.62598	170.272	42.8336	257.243	2.55785	NA
JG-WU82-72	222.097	21273	66.5328	18.4417	1.37268	0.305288	1.93025	0.0408507	1.35706	0.703047		258.104	3.43342	270.522	4.58406	379.398	30.8475	258.104	3.43342	NA
JG-WU82-73	498.232	66113.7	63.5619	19.3442	0.860266	0.291187	1.74511	0.0408707	1.51834	0.870053		258.227	3.84328	259.494	3.99612	270.923	19.7003	258.227	3.84328	NA
JG-WU82-74	193.858	15282.5	47.9106	19.5503	1.06343	0.288281	1.64327	0.0408939	1.25277	0.762367		258.371	3.1728	257.206	3.73376	246.618	24.4882	258.371	3.1728	NA
JG-WU82-75	45.7811	1.08566e+06	51.0947	19.0422	1.70885	0.296011	2.24784	0.0408989	1.46036	0.64967		258.402	3.69896	263.279	5.21313	306.93	38.944	258.402	3.69896	NA
JG-WU82-76	521.423	3.00147e+06	51.6505	19.3482	0.716791	0.291956	1.47036	0.040987	1.28381	0.873127		258.948	3.25852	260.098	3.37385	270.451	16.4522	258.948	3.25852	NA
JG-WU82-77	184.077	297941	39.5302	19.4241	0.832878	0.292208	1.46138	0.0411832	1.20081	0.821697		260.163	3.06187	260.296	3.35548	261.495	19.1494	260.163	3.06187	NA
JG-WU82-78	214.83	20932	47.2499	19.2673	1.07882	0.295203	1.36994	0.0412695	0.844322	0.616322		260.697	2.15721	262.647	3.17041	280.096	24.6947	260.697	2.15721	NA
JG-WU82-79	294.816	77613.9	260.661	19.4915	0.865263	0.292612	1.56027	0.0413833	1.29837	0.832144		261.402	3.32607	260.613	3.58638	253.51	19.8772	261.402	3.32607	NA
JG-WU82-80	122.257	8316.43	53.0491	19.3312	1.1208	0.29562	1.79154	0.0414649	1.39765	0.780138		261.906	3.58716	262.973	4.15063	272.468	25.6775	261.906	3.58716	NA
JG-WU82-81	241.142	698538	67.509	19.2696	1.10627	0.296918	1.83864	0.0415144	1.46859	0.798737		262.213	3.77356	263.99	4.27418	279.816	25.321	262.213	3.77356	NA
JG-WU82-82	67.6699	42111.9	63.7153	18.878	1.26483	0.303326	1.64906	0.0415485	1.05811	0.641647		262.424	2.72098	268.995	3.89695	326.594	28.7316	262.424	2.72098	NA
JG-WU82-83	104.226	31007.9	84.3609	19.3531	1.33828	0.296259	1.67521	0.0416016	1.00763	0.601495		262.753	2.59434	263.474	3.88758	269.87	30.7011	262.753	2.59434	NA
JG-WU82-84	92.4532	13407.9	59.7984	19.5793	1.32873	0.293245	1.70578	0.0416596	1.06966	0.627078		263.112	2.75773	261.11	3.9274	243.208	30.6166	263.112	2.75773	NA
JG-WU82-85	366.153	205135	111.839	19.3804	0.894578	0.297092	1.61059	0.0417774	1.3393	0.83156		263.841	3.46229	264.126	3.74573	266.647	20.5343	263.841	3.46229	NA
JG-WU82-86	684.332	18645.9	145.862	17.9841	0.887337	0.321152	1.71895	0.0419072	1.47221	0.856462		264.644	3.81723	282.789	4.2428	435.624	19.7765	264.644	3.81723	NA
JG-WU82-87	193.341	14808.4	178.085	19.7632	1.07965	0.292278	1.81128	0.0419123	1.45433	0.802931		264.675	3.77131	260.351	4.15965	221.617	24.9844	264.675	3.77131	NA
JG-WU82-88	236.995	26649.1	89.9645	19.8084	1.92491	0.291777	2.87937	0.041936	2.14138	0.743696		264.822	5.55594	259.957	6.60385	216.328	44.5928	264.822	5.55594	NA
JG-WU82-89	95.0401	21322.3	44.5717	19.6024	1.50745	0.294935	1.89408	0.0419492	1.1468	0.605462		264.904	2.97633	262.436	4.38036	240.441	34.7476	264.904	2.97633	NA
JG-WU82-90	95.3155	30144.8	40.6515	18.722	1.75531	0.310461	2.01425	0.0421742	0.987965	0.490488		266.296	2.57731	274.538	4.8454	345.394	39.6907	266.296	2.57731	NA
JG-WU82-91	322.555	61888.2	125.445	18.6339	0.922375	0.314929	1.60801	0.0425798	1.31717	0.819128		268.804	3.4678	277.994	3.9105	356.043	20.8192	268.804	3.4678	NA
JG-WU82-92	240.859	67353.1	98.1711	19.5407	0.878704	0.300469	1.99336	0.0426019	1.78924	0.897598		268.94	4.71299	266.767	4.67648	247.726	20.2245	268.94	4.71299	NA
JG-WU82-93	179.691	24653.5	60.1725	19.5214	0.921434	0.300911	1.47789	0.0426223	1.15547	0.78184		269.067	3.045	267.111	3.47107	249.977	21.2045	269.067	3.045	NA
JG-WU82-94	382.747	76815.7	63.0731	19.3309	0.89695	0.304722	1.53411	0.0427409	1.24458	0.811271		269.8	3.28859	270.081	3.6381	272.499	20.5383	269.8	3.28859	NA
JG-WU82-95	100.302	31759.9	53.1849	19.1681	1.41381	0.307745	1.68497	0.0428014	0.916655	0.544019		270.174	2.42539	272.431	4.02617	291.87	32.2708	270.174	2.42539	NA
JG-WU82-96	225.882	46687.8	69.4896	19.6837	0.958576	0.300036	1.8642	0.0428517	1.59887	0.857669		270.485	4.23522	266.428	4.36861	230.892	22.1199	270.485	4.23522	NA
JG-WU82-97	330.194	27676.3	561.174	17.3865	1.09527	0.341734	1.75587	0.0431109	1.37239	0.781602		272.087	3.65638	298.485	4.54094	510.397	24.0661	272.087	3.65638	NA
JG-WU82-98	147.243	24937	52.3606	19.4918	1.11376	0.30505	1.62996	0.043143	1.19009	0.730134		272.285	3.17295	270.337	3.86858	253.49	25.636	272.285	3.17295	NA
JG-WU82-99	126.781	11913.9	82.8957	19.271	1.14557	0.308941	1.68165	0.0431984	1.2311	0.732079		272.628	3.28633	273.36	4.03016	279.652	26.237	272.628	3.28633	NA
JG-WU82-100	114.799	12083.4	74.6712	19.9277	1.48479	0.299086	1.88805	0.0432456	1.16624	0.617698		272.92	3.11647	265.686	4.41371	202.4	34.4691	272.92	3.11647	NA
JG-WU82-101	262.084	111134	38.4947	19.3084	0.843586	0.312541	1.7263	0.0437867	1.50615	0.87247		276.262	4.07301	276.149	4.17391	275.166	19.3252	276.262	4.07301	NA
JG-WU82-102	169.41	7529.86	51.9148	20.0441	0.856443	0.301397	1.47379	0.0438342	1.1994	0.81382		276.555	3.24685	267.491	3.46574	188.841	19.9521	276.555	3.24685	NA
JG-WU82-103	70.5001	42438.3	83.8526	19.5738	1.44838	0.310799	1.80823	0.044141	1.08253	0.598669		278.45	2.95013	274.8	4.35341	243.829	33.377	278.45	2.95013	NA
JG-WU82-104	1027.74	57675	66.8934	18.6586	0.639407	0.326804	1.31313	0.044244	1.14694	0.873439		279.086	3.13265	287.123	3.28412	353.044	14.4457	279.086	3.13265	NA
JG-WU82-105	826.295	103578	126.876	19.1205	0.680622	0.322192	1.44087	0.0446993	1.26998	0.881401		281.896	3.50288	283.587	3.56514	297.538	15.5272	281.896	3.50288	NA
JG-WU82-106	314.938	65416.4	36.2781	19.1148	0.72093	0.322324	1.69921	0.0447045	1.53869	0.905534		281.928	4.2445	283.689	4.20565	298.205	16.4266	281.928	4.2445	NA
JG-WU82-107	119.331	65431	50.3205	19.2962	1.35704	0.319934	1.68931	0.0447939	1.0061	0.595566		282.48	2.78066	281.852	4.15768	276.664	31.0682	282.48	2.78066	NA
JG-WU82-108	243.433	54605.7	64.1677	19.1026	0.894288	0.326602	1.95674	0.0452689	1.74043	0.889452		285.409	4.85899	286.969	4.89154	299.708	20.3965	285.409	4.85899	NA
JG-WU82-109	81.421	23158.7	61.6361	19.5418	1.14231	0.319658	1.54551	0.0453251	1.04102	0.673576		285.756	2.9098	281.639	3.80125	247.584	26.2775	285.756	2.9098	NA
JG-WU82-110	151.115	189014	69.5195	18.7868	1.15065	0.333221	1.6494	0.0454226	1.18175	0.716471		286.357	3.30996	292.022	4.18589	337.563	26.0678	286.357	3.30996	NA
JG-WU82-111	136.315	9148.88	87.0119	19.5064	1.4104	0.322018	1.71829	0.045577	0.981472	0.571192		287.31	2.75795	283.454	4.24983	251.79	32.4468	287.31	2.75795	NA
JG-WU82-112	355.626	66259.3	52.4964	19.1238	0.911601	0.329142	1.5898	0.0456715	1.30248	0.819272		287.892	3.66725	288.91	3.99749	297.172	20.7788	287.892	3.66725	NA
JG-WU82-113	109.088	78002	49.3368	19.1894	0.906386	0.3359	1.33762	0.046769	0.983714	0.735421		294.654	2.83331	294.06	3.41507	289.343	20.7109	294.654	2.83331	NA
JG-WU82-114	351.885	40141.8	53.8317	17.7086	1.41356	0.366038	1.87698	0.0470326	1.23487	0.6579		296.277	3.57582	316.712	5.10689	469.938	31.3028	296.277	3.57582	NA
JG-WU82-115	688.13	2.2984e+06	76.8099	17.9596	1.08723	0.366844	2.08408	0.0478041	1.778	0.853138		301.026	5.22922	317.312	5.67951	438.665	24.2191	301.026	5.22922	NA
JG-WU82-116	48.2331	6897.71	46.8576	19.2332	2.49786	0.347301	2.80101	0.0484668	1.2674	0.452482		305.102	3.7768	302.689	7.33149	284.109	57.1366	305.102	3.7768	NA
JG-WU82-117	238.005	167898	65.2744	18.5084	1.00041	0.374974	2.04504	0.0503567	1.78364	0.872179		316.711	5.51248	323.333	5.66296	371.281	22.507	316.711	5.51248	NA
JG-WU82-118	245.476	31202.7	46.0716	18.7809	1.07252	0.376933	1.83556	0.0513651	1.48962	0.811537		322.897	4.69148	324.779	5.10216	338.27	24.2891	322.897	4.69148	NA
JG-WU82-119	416.021	2.96284e+07	373.087	18.9114	0.774238	0.387847	1.6781	0.0532197	1.48881	0.887204		334.258	4.84967	332.795	4.76178	322.602	17.5868	334.258	4.84967	NA
JG-WU82-120	300.009	24728.7	195.762	18.6533	0.766307	0.394529	1.46768	0.0533978	1.25174	0.852871		335.349	4.09038	337.673	4.21614	353.702	17.3047	335.349	4.09038	NA
JG-WU82-121	71.2893	10027.9	55.4867	19.2083	1.40439	0.384708	1.81042	0.0536178	1.1425	0.63107		336.694	3.74801	330.497	5.10725	287.107	32.1132	336.694	3.74801	NA
JG-WU82-122	283.272	81481.1	76.2201	18.9609	0.991121	0.391722	1.69674	0.053892	1.37718	0.811659		338.372	4.53979	335.626	4.84925	316.624	22.5486	338.372	4.53979	NA
JG-WU82-123	117.774	53301	58.2871	18.5725	0.901568	0.401686	1.32627	0.0541309	0.972707	0.733417		339.833	3.21996	342.871	3.85922	363.49	20.3232	339.833	3.21996	NA
JG-WU82-124	236.062	53206	95.2501	18.8037	0.900526	0.399608	1.70792	0.0545211	1.45122	0.8497		342.219	4.83682	341.364	4.9514	335.54	20.409	342.219	4.83682	NA
JG-WU82-125	194.618	88759.3	46.465	18.6145	0.964072	0.403744	1.52526	0.0545312	1.18194	0.77491		342.281	3.94002	344.36	4.45446	358.395	21.7522	342.281	3.94002	NA
JG-WU82-126	392.067	121385	200.246	18.2079	0.837367	0.42614	1.62076	0.0562988	1.38769	0.856197		353.077	4.76787	360.432	4.91748	408.023	18.736	353.077	4.76787	NA
JG-WU82-127	207.102	186358	308.348	18.4866	1.10922	0.420065	1.93908	0.0563458	1.59049	0.820229		353.364	5.46895	356.097	5.82422	373.929	24.9566	353.364	5.46895	NA
JG-WU82-128	831.356	350531	90.1487	18.4943	0.769244	0.43596	1.61531	0.0585021	1.42039	0.879326		366.51	5.06064	367.4	4.97961	372.997	17.3148	366.51	5.06064	NA
JG-WU82-129	154.152	26435.7	497.861	18.6582	0.855714	0.434657	1.49911	0.0588443	1.23089	0.82108		368.593	4.40972	366.478	4.61175	353.119	19.3327	368.593	4.40972	NA
JG-WU82-130	578.539	256425	71.2731	17.982	0.73502	0.458238	1.55558	0.0597884	1.37097	0.881327		374.339	4.98591	383.032	4.96349	435.886	16.3662	374.339	4.98591	NA
JG-WU82-131	120.746	25270.2	176.045	16.7608	0.863014	0.498279	1.42965	0.0605975	1.13979	0.797248		379.258	4.19804	410.537	4.82774	590.425	18.7078	379.258	4.19804	NA
JG-WU82-132	77.1598	6843.39	109.985	19.1724	1.18174	0.441893	1.44001	0.0614727	0.822867	0.571433		384.575	3.072	371.587	4.48107	291.384	26.9826	384.575	3.072	NA
JG-WU82-133	113.636	52258.7	92.8049	17.8849	1.14259	0.488395	1.70587	0.0633791	1.26668	0.742541		396.143	4.86678	403.816	5.68372	447.928	25.4092	396.143	4.86678	NA
JG-WU82-134	201.564	45156.3	70.1907	18.0737	0.86962	0.485676	1.70005	0.0636916	1.46079	0.859267		398.037	5.63863	401.96	5.6431	424.546	19.4019	398.037	5.63863	NA
JG-WU82-135	145.739	53081.4	59.0521	18.3433	0.867265	0.48618	1.42378	0.0647085	1.12916	0.793072		404.197	4.4239	402.304	4.72936	391.426	19.4614	404.197	4.4239	103.263
JG-WU82-136	265.552	72309.2	98.2405	18.2049	0.941281	0.491316	1.54919	0.0648987	1.23044	0.794248		405.349	4.83401	405.807	5.18239	408.394	21.0598	405.349	4.83401	99.2543
JG-WU82-137	289.748	71033.1	126.981	18.1635	0.658955	0.522415	1.39959	0.0688497	1.23476	0.882229		429.221	5.12725	426.763	4.87658	413.486	14.7302	429.221	5.12725	103.806
JG-WU82-138	194.317	43040	116.353	17.1705	0.907051	0.5551	1.71161	0.069158	1.4515	0.848034		431.081	6.05252	448.332	6.20372	537.833	19.8576	431.081	6.05252	80.1514
JG-WU82-139	184.096	340124	537.069	17.5985	0.735647	0.56518	1.16089	0.0721689	0.898052	0.773587		449.209	3.89679	454.892	4.25645	483.734	16.2644	449.209	3.89679	92.8629
JG-WU82-140	805.054	102787	250.147	17.5714	0.734313	0.566299	1.34127	0.0722007	1.1224	0.836821		449.4	4.87228	455.618	4.92403	487.087	16.2032	449.4	4.87228	92.263
JG-WU82-141	419.429	72951	75.7889	17.8309	0.718443	0.561687	1.56421	0.0726701	1.38946	0.88828		452.222	6.0681	452.624	5.71254	454.676	15.946	452.222	6.0681	99.4602
JG-WU82-142	328.781	14787.3	31.3251	16.9287	1.35875	0.591904	2.09831	0.0727048	1.59896	0.762025		452.431	6.98618	472.083	7.92214	568.797	29.5613	452.431	6.98618	79.5417
JG-WU82-143	422.795	56219	63.1412	17.2755	0.822177	0.588862	1.87327	0.0738127	1.6832	0.898536		459.085	7.4586	470.141	7.04961	524.459	18.0505	459.085	7.4586	87.5351
JG-WU82-144	185.062	167823	73.1473	17.5917	0.951954	0.581185	1.69246	0.074184	1.39936	0.826819		461.314	6.22987	465.222	6.31663	484.568	21.0167	461.314	6.22987	95.2012
JG-WU82-145	499.133	978472	763.275	17.4548	0.67645	0.594165	1.83387	0.0752507	1.70455	0.929483		467.712	7.69005	473.524	6.94031	501.8	14.8823	467.712	7.69005	93.2069
JG-WU82-146	219.94	45807.3	78.1209	16.8995	0.867213	0.622291	1.53327	0.0763053	1.26446	0.824683		474.032	5.77889	491.282	5.972	572.557	18.8634	474.032	5.77889	82.7921
JG-WU82-147	247.931	80644.1	49.1755	17.1216	0.800108	0.617776	1.71884	0.0767472	1.52126	0.885051		476.678	6.98989	488.453	6.66474	544.064	17.466	476.678	6.98989	87.6144
JG-WU82-148	533.457	46788.9	461.199	16.6872	0.906052	0.637265	1.72769	0.0771598	1.47105	0.851454		479.148	6.79293	500.611	6.82816	599.946	19.6002	479.148	6.79293	79.8652
JG-WU82-149	47.1145	8104.44	79.5873	17.9118	1.15426	0.596787	1.54845	0.0775614	1.03216	0.66658		481.55	4.78928	475.192	5.87629	444.593	25.6846	481.55	4.78928	108.313
JG-WU82-150	936.525	104459	66.1881	17.0478	0.625626	0.629096	1.39387	0.0778169	1.24558	0.893611		483.079	5.79719	495.533	5.46545	553.484	13.6551	483.079	5.79719	87.2797
JG-WU82-151	587.132	79779.8	59.5919	17.6384	1.03246	0.609677	1.98704	0.0780275	1.69775	0.85441		484.338	7.92152	483.356	7.64197	478.681	22.8313	484.338	7.92152	101.182
JG-WU82-152	611.412	114478	238.04	17.3792	0.755177	0.627853	1.58197	0.0791728	1.39009	0.878705		491.183	6.57423	494.757	6.1955	511.324	16.6158	491.183	6.57423	96.061
JG-WU82-153	127.98	79247.5	60.5092	17.3561	0.717196	0.6331	1.26152	0.0797283	1.03781	0.822671		494.501	4.9401	498.025	4.96577	514.234	15.7762	494.501	4.9401	96.1627
JG-WU82-154	101.874	16013.9	108.098	17.7351	1.12837	0.619637	1.77137	0.0797367	1.36548	0.77086		494.551	6.50044	489.62	6.88121	466.595	25.001	494.551	6.50044	105.992
JG-WU82-155	309.955	109984	149.349	17.3333	0.745609	0.63748	1.80538	0.0801742	1.64422	0.910734		497.163	7.86717	500.744	7.13666	517.127	16.3751	497.163	7.86717	96.1393
JG-WU82-156	240.038	1.03406e+06	57.491	17.1039	0.969132	0.653283	1.90634	0.0810744	1.64162	0.861137		502.532	7.93632	510.497	7.64878	546.307	21.1945	502.532	7.93632	91.9872
JG-WU82-157	155.615	68466.7	165.585	17.067	0.87897	0.664296	1.36288	0.0822635	1.04156	0.764237		509.619	5.10361	517.238	5.52361	551.053	19.1764	509.619	5.10361	92.4809
JG-WU82-158	421.443	150820	332.698	17.2094	0.82358	0.670205	1.61521	0.0836878	1.38946	0.860239		518.098	6.9171	520.837	6.58116	532.891	18.0342	518.098	6.9171	97.2239
JG-WU82-159	56.5457	13121.7	63.4762	17.0418	1.1803	0.678141	1.51891	0.0838539	0.956027	0.629416		519.085	4.76805	525.65	6.23246	554.247	25.7459	519.085	4.76805	93.656
JG-WU82-160	266.681	81294.6	147.912	17.3436	0.742439	0.668415	1.74015	0.0841147	1.57382	0.904416		520.636	7.87175	519.748	7.07892	515.825	16.3051	520.636	7.87175	100.933
JG-WU82-161	213.142	341344	257.61	17.308	0.72412	0.671936	1.87756	0.0843845	1.73231	0.922636		522.24	8.69005	521.889	7.66197	520.329	15.9028	522.24	8.69005	100.367
JG-WU82-162	313.661	25496.1	19.206	16.4836	0.808382	0.705952	1.59514	0.0844334	1.37514	0.862077		522.531	6.90201	542.34	6.70261	626.467	17.4459	522.531	6.90201	83.4092
JG-WU82-163	48.6908	7939.69	93.3797	16.9161	1.18524	0.700341	1.66916	0.0859602	1.17528	0.704117		531.601	5.99714	538.995	6.98084	570.394	25.8103	531.601	5.99714	93.199
JG-WU82-164	177.596	101027	57.0516	17.1066	0.646607	0.692909	1.38405	0.0860059	1.22373	0.88416		531.872	6.24739	534.547	5.75216	545.958	14.125	531.872	6.24739	97.4199
JG-WU82-165	63.8341	19255.2	87.7324	16.298	0.935424	0.750464	1.45325	0.0887468	1.11217	0.765298		548.121	5.84407	568.494	6.32635	650.863	20.0819	548.121	5.84407	84.2145
JG-WU82-166	564.89	123814	1411.24	16.5789	0.757139	0.767475	1.57513	0.0923225	1.38122	0.876894		569.258	7.52556	578.313	6.94487	614.026	16.3746	569.258	7.52556	92.7091
JG-WU82-167	213.17	162141	125.893	16.3662	0.707652	0.78759	1.35139	0.0935267	1.15129	0.851934		576.361	6.34761	589.804	6.04571	641.896	15.2287	576.361	6.34761	89.7903
JG-WU82-168	72.9241	24835.4	77.3376	17.0467	0.934733	0.759987	1.48276	0.0940016	1.15103	0.776271		579.16	6.3756	574.003	6.50137	553.62	20.3861	579.16	6.3756	104.613
JG-WU82-169	62.8932	15342.2	78.9886	16.6499	1.27195	0.812804	1.6349	0.098194	1.02716	0.628271		603.816	5.92057	604.026	7.44329	604.791	27.5222	603.816	5.92057	99.8389
JG-WU82-170	66.2753	122360	201.013	16.805	1.01775	0.816012	1.52783	0.0995001	1.13949	0.745825		611.478	6.64751	605.821	6.97092	584.736	22.0929	611.478	6.64751	104.573
JG-WU82-171	248.7	67230.5	144.779	16.4853	0.777858	0.832348	1.68247	0.0995612	1.49186	0.886707		611.837	8.70796	614.914	7.76037	626.24	16.7883	611.837	8.70796	97.7
JG-WU82-172	607.018	243462	420.474	15.6857	0.922782	0.877531	1.92006	0.0998747	1.68377	0.876939		613.674	9.85631	639.648	9.11236	732.517	19.529	613.674	9.85631	83.7761
JG-WU82-173	592.941	71688.3	142.131	14.3622	0.769808	0.959941	1.45598	0.100036	1.23583	0.848796		614.617	7.24479	683.266	7.24095	916.497	15.8431	614.617	7.24479	67.0616
JG-WU82-174	592.012	829847	203.048	15.1738	0.867571	0.911274	1.37629	0.10033	1.06841	0.776297		616.342	6.28008	657.735	6.66305	802.368	18.1915	616.342	6.28008	76.8154
JG-WU82-175	664.215	214805	875.025	16.5095	0.815116	0.849634	1.59512	0.101778	1.37113	0.859577		624.821	8.16502	624.448	7.44008	623.077	17.6001	624.821	8.16502	100.28
JG-WU82-176	226.078	61282	520.756	14.9092	1.26378	0.953009	1.93626	0.103096	1.46697	0.757627		632.524	8.83823	679.668	9.59401	839.102	26.3163	632.524	8.83823	75.3811
JG-WU82-177	86.4737	35698.5	111.664	16.4446	0.938057	0.875197	1.23682	0.104428	0.806085	0.65174		640.305	4.91335	638.385	5.86138	631.617	20.2138	640.305	4.91335	101.375
JG-WU82-178	724.45	156346	138.059	15.2831	0.567279	0.953273	1.87612	0.10571	1.7883	0.953191		647.786	11.0213	679.805	9.2973	787.316	11.9107	647.786	11.0213	82.2777
JG-WU82-179	450.408	55988.8	313.657	15.864	0.68466	0.954373	1.5822	0.109855	1.42639	0.901525		671.904	9.10144	680.377	7.84531	708.492	14.5485	671.904	9.10144	94.8359
JG-WU82-180	255.349	42034.7	90.1676	15.5427	0.630908	1.10679	1.51538	0.124818	1.3778	0.90921		758.238	9.85598	756.628	8.08357	751.852	13.3223	758.238	9.85598	100.849
JG-WU82-181	288.609	202827	176.684	15.3166	0.665015	1.12413	1.30154	0.12493	1.11882	0.859612		758.877	8.00973	764.953	6.99405	782.724	13.9728	758.877	8.00973	96.9533
JG-WU82-182	54.3941	19986.2	121.373	15.2658	0.916017	1.13165	1.41946	0.125349	1.08433	0.763905		761.278	7.78599	768.54	7.65168	789.688	19.2251	761.278	7.78599	96.4024
JG-WU82-183	379.717	103937	66.6207	15.3471	0.850731	1.1406	1.62547	0.127012	1.38506	0.852102		770.799	10.0625	772.793	8.7946	778.541	17.8866	770.799	10.0625	99.0057
JG-WU82-184	472.536	162133	177.392	14.5936	0.766855	1.25046	1.73828	0.13241	1.55999	0.89743		801.598	11.7586	823.612	9.80759	883.517	15.8573	801.598	11.7586	90.7281
JG-WU82-185	456.382	213575	156.046	14.9988	0.796182	1.23598	1.76964	0.13451	1.58041	0.893073		813.545	12.0792	817.058	9.93279	826.634	16.6017	813.545	12.0792	98.4166
JG-WU82-186	100.029	24462.1	160.035	14.6028	0.906448	1.29655	1.38924	0.137376	1.05278	0.757809		829.807	8.19716	844.196	7.96398	882.241	18.727	829.807	8.19716	94.0568
JG-WU82-187	238.719	59290.3	283.383	14.5666	0.779172	1.30605	1.36519	0.13804	1.12099	0.821128		833.572	8.76537	848.391	7.85095	887.364	16.1021	833.572	8.76537	93.938
JG-WU82-188	48.6956	23856.9	183.571	14.0118	0.965195	1.46158	1.81436	0.148595	1.53633	0.84676		893.081	12.8126	914.659	10.939	967.078	19.7035	967.078	19.7035	92.3484
JG-WU82-189	508.773	147279	120.809	13.8803	0.73839	1.57628	1.97036	0.158752	1.82677	0.927126		949.839	16.1336	960.903	12.2415	986.31	15.0087	986.31	15.0087	96.3022
JG-WU82-190	148.244	78074.7	41.4895	13.8722	0.700356	1.6433	1.33889	0.165406	1.14111	0.85228		986.747	10.4405	986.983	8.45194	987.488	14.2375	987.488	14.2375	99.925
JG-WU82-191	227.962	132026	119.919	13.8385	0.765731	1.61134	1.45151	0.161795	1.2331	0.849529		966.746	11.0701	974.631	9.09463	992.464	15.5681	992.464	15.5681	97.4087
JG-WU82-192	186.604	704062	78.4335	13.4454	0.990791	1.61066	1.88891	0.157132	1.60821	0.851392		940.818	14.078	974.363	11.8336	1050.8	19.986	1050.8	19.986	89.5334
JG-WU82-193	281.507	164569	269.016	13.3938	0.609305	1.79134	1.55445	0.174088	1.43005	0.919976		1034.6	13.6691	1042.31	10.1294	1058.54	12.2652	1058.54	12.2652	97.7385
JG-WU82-194	200.282	94674.4	197.709	13.2616	0.879941	1.82387	1.34046	0.1755	1.0112	0.754371		1042.35	9.73223	1054.08	8.7911	1078.44	17.6607	1078.44	17.6607	96.6529
JG-WU82-195	402.238	1.05086e+06	171.858	13.2084	0.751156	1.78014	1.59486	0.170604	1.40689	0.88214		1015.44	13.2178	1038.23	10.3694	1086.52	15.0494	1086.52	15.0494	93.4578
JG-WU82-196	279.247	615261	186.863	13.2062	0.918896	1.90882	2.46131	0.182907	2.28335	0.927696		1082.84	22.76	1084.17	16.4015	1086.87	18.4187	1086.87	18.4187	99.6283
JG-WU82-197	411.453	178970	539.662	13.1889	0.714426	1.82656	1.58809	0.174796	1.41831	0.893096		1038.48	13.6038	1055.05	10.4207	1089.47	14.3114	1089.47	14.3114	95.3203
JG-WU82-198	289.845	36070.2	72.9788	13.1702	0.819087	1.65215	1.72259	0.157881	1.51539	0.879717		944.989	13.3201	990.376	10.8963	1092.35	16.3863	1092.35	16.3863	86.5096
JG-WU82-199	197.273	320818	245.708	13.1589	0.64831	1.96798	1.25734	0.187901	1.07731	0.856817		1109.99	10.9852	1104.62	8.46548	1094.04	12.9806	1094.04	12.9806	101.458
JG-WU82-200	328.478	209723	83.7701	13.1156	0.668785	1.95111	1.61824	0.185677	1.47357	0.910604		1097.91	14.8758	1098.83	10.8639	1100.64	13.3815	1100.64	13.3815	99.752
JG-WU82-201	183.967	139064	76.8543	13.0676	0.626065	1.95213	1.30768	0.185093	1.14807	0.877945		1094.74	11.5591	1099.18	8.7804	1107.96	12.5161	1107.96	12.5161	98.8068
JG-WU82-202	112.128	46881.2	116.263	12.9714	0.692428	2.1111	1.2603	0.198693	1.05304	0.835549		1168.3	11.2522	1152.44	8.68378	1122.72	13.825	1122.72	13.825	104.059
JG-WU82-203	306.318	180092	120.651	12.8777	0.823372	1.86597	1.67825	0.174354	1.46239	0.871378		1036.05	13.9964	1069.1	11.0953	1137.16	16.3678	1137.16	16.3678	91.109
JG-WU82-204	59.2634	17140.6	111.914	12.3486	0.873637	2.30666	1.38841	0.206676	1.07909	0.777215		1211.08	11.9145	1214.33	9.83456	1220.1	17.1913	1220.1	17.1913	99.2612
JG-WU82-205	80.0066	12912.5	67.0457	12.2203	2.63496	1.99195	3.54608	0.176623	2.37311	0.669222		1048.5	22.9641	1112.78	23.9763	1240.61	51.6504	1240.61	51.6504	84.5149
JG-WU82-206	130.625	41062.7	31.0661	11.8761	0.650916	2.56252	1.213	0.220815	1.02356	0.843826		1286.18	11.9347	1290.01	8.85955	1296.38	12.6568	1296.38	12.6568	99.2134
JG-WU82-207	206.569	73044	34.5108	10.9659	0.57955	2.70743	1.39857	0.215422	1.27284	0.910101		1257.64	14.543	1330.5	10.3708	1449.76	11.0322	1449.76	11.0322	86.7481
JG-WU82-208	171.932	43340.5	46.4811	9.65916	0.547299	3.54084	1.23063	0.248161	1.10223	0.895665		1428.98	14.1272	1536.39	9.74411	1687.5	10.099	1687.5	10.099	84.6804
JG-WU82-209	95.3402	152477	56.7423	9.48639	0.705629	4.11451	2.05291	0.283209	1.92782	0.939071		1607.5	27.4282	1657.19	16.7707	1720.73	12.9662	1720.73	12.9662	93.4196
JG-WU82-210	216.305	771.7	80.8545	5.28511	6.49043	1.9293	6.75394	0.0739847	1.86815	0.276602		460.118	8.29612	1091.3	45.197	2734.59	106.943	2734.59	106.943	16.8259
JG-WU82-211	83.9635	196480	201.153	4.83083	0.578054	15.1419	2.11972	0.530752	2.03938	0.962098		2744.62	45.5838	2824.21	20.1926	2881.52	9.38567	2881.52	9.38567	95.2491
JG-AW4
JG-AW4-1	623.23	30522.4	1.58969	20.625	5.05052	0.124207	5.21646	0.0185796	1.30524	0.250216		118.673	1.5348	118.879	5.85207	122.977	119.009	118.673	1.5348	NA
JG-AW4-2	521.355	125638	1.89527	17.1417	0.883488	0.701125	1.3467	0.087166	1.01638	0.754725		538.755	5.25325	539.463	5.6359	542.47	19.3244	538.755	5.25325	99.3151
JG-AW4-3	129.876	6220.43	1.75158	24.7095	20.9484	0.099487	22.2121	0.017829	7.38538	0.332493		113.921	8.33959	96.3027	20.4105	-320.838	542.526	113.921	8.33959	NA
JG-AW4-4	47.992	5160.23	0.694051	20.3096	19.748	0.290957	20.0005	0.0428576	3.16835	0.158414		270.522	8.39373	259.312	45.8018	159.193	465.975	270.522	8.39373	NA
JG-AW4-5	592.37	9703.76	34.7968	17.0366	1.12995	0.410905	3.2309	0.0507717	3.02687	0.93685		319.257	9.42811	349.526	9.55453	555.908	24.6411	319.257	9.42811	NA
JG-AW4-6	88.6387	11293.7	1.35845	18.5788	12.6693	0.306732	12.8737	0.0413309	2.28522	0.17751		261.077	5.84698	271.645	30.6929	363.708	286.676	261.077	5.84698	NA
JG-AW4-7	179.267	26327.9	1.70169	20.5863	5.47795	0.278051	5.65461	0.0415146	1.40235	0.248002		262.214	3.60339	249.11	12.492	127.443	129.003	262.214	3.60339	NA
JG-AW4-8	259.946	28674.8	0.959895	20.4815	3.38737	0.222497	3.79758	0.033051	1.71678	0.452072		209.615	3.54076	203.986	7.01812	139.402	79.5754	209.615	3.54076	NA
JG-AW4-9	204.04	12355.7	1.78212	20.8898	14.7187	0.140952	14.8033	0.0213553	1.58079	0.106786		136.216	2.1307	133.892	18.5713	92.8487	350.251	136.216	2.1307	NA
JG-AW4-10	252.169	102008	2.56241	17.8495	1.47611	0.524106	1.88842	0.067849	1.17781	0.623701		423.184	4.82423	427.891	6.59385	453.3	32.7864	423.184	4.82423	93.3563
JG-AW4-11	210.591	25297.6	0.83907	20.0398	6.02345	0.294566	6.11117	0.0428129	1.03175	0.16883		270.245	2.73062	262.147	14.1202	190.398	140.228	270.245	2.73062	NA
JG-AW4-12	287.559	40258.5	1.12601	20.8872	6.02999	0.216974	6.66635	0.0328691	2.84242	0.426384		208.48	5.83109	199.388	12.0688	93.1457	142.924	208.48	5.83109	NA
JG-AW4-13	149.396	45499.3	1.49751	17.6302	4.11674	0.618304	4.22136	0.0790604	0.93401	0.221258		490.512	4.41147	488.784	16.3781	480.67	90.9908	490.512	4.41147	102.047
JG-AW4-14	362.076	71657.3	1.34012	18.4028	2.61744	0.452211	2.76366	0.0603564	0.887042	0.320966		377.792	3.25487	378.827	8.7385	385.132	58.7872	377.792	3.25487	NA
JG-AW4-15	313.572	365474	2.22939	13.2402	0.696868	1.89333	1.06011	0.18181	0.798882	0.753583		1076.86	7.92267	1078.75	7.04396	1082.58	13.9776	1082.58	13.9776	99.4708
JG-AW4-16	340.972	26880.8	0.875187	19.7303	8.32471	0.127837	8.46189	0.0182932	1.51752	0.179336		116.86	1.7574	122.152	9.73915	226.469	192.68	116.86	1.7574	NA
JG-AW4-17	241.936	12788.9	0.699857	21.4161	8.12619	0.126992	8.1749	0.019725	0.891124	0.109007		125.918	1.11119	121.391	9.35364	33.5932	194.882	125.918	1.11119	NA
JG-AW4-18	500.553	143305	1.23548	18.6417	1.92418	0.401148	2.03324	0.0542361	0.656978	0.323118		340.476	2.17881	342.48	5.91078	356.114	43.4438	340.476	2.17881	NA
JG-AW4-19	160.853	9870.62	1.08348	20.6354	7.10326	0.243894	7.23112	0.0365016	1.35381	0.187221		231.112	3.0734	221.604	14.3973	121.792	167.505	231.112	3.0734	NA
JG-AW4-20	211.728	28294.1	1.05029	20.4969	16.3606	0.148639	16.4245	0.0220963	1.44668	0.0880808		140.891	2.01613	140.709	21.5842	137.645	386.52	140.891	2.01613	NA
JG-AW4-21	656.322	7705.94	1.64702	19.9504	5.41535	0.121768	6.24669	0.0176192	3.11371	0.498457		112.592	3.47533	116.674	6.88522	200.756	125.832	112.592	3.47533	NA
JG-AW4-22	289.612	111346	2.22461	17.1285	1.81714	0.668169	1.96407	0.0830051	0.745384	0.379509		514.035	3.68275	519.599	7.98808	544.155	39.6975	514.035	3.68275	94.4648
JG-AW4-23	240.33	93349.3	1.46718	16.2062	1.53967	0.937933	2.21519	0.110243	1.59264	0.718962		674.161	10.1946	671.8	10.8866	663.911	32.9834	674.161	10.1946	101.544
JG-AW4-24	84.4694	11728.4	1.43163	21.406	11.6817	0.290796	11.8067	0.0451465	1.71335	0.145116		284.655	4.771	259.186	27.0142	34.7178	280.53	284.655	4.771	NA
JG-AW4-25	149.843	29300.8	0.883644	19.895	4.21525	0.325968	4.50512	0.0470346	1.5899	0.352909		296.29	4.60408	286.483	11.246	207.221	97.79	296.29	4.60408	NA
JG-AW4-26	446.019	82642.4	14.2495	19.2289	3.25812	0.234912	4.21219	0.0327611	2.66969	0.6338		207.806	5.4593	214.246	8.1361	285.629	74.5148	207.806	5.4593	NA
JG-AW4-27	160.293	10553.9	0.654287	19.46	11.1884	0.149333	11.2756	0.0210764	1.39929	0.124099		134.455	1.86194	141.323	14.8768	258.237	257.769	134.455	1.86194	NA
JG-AW4-28	352.863	33199.6	1.08612	20.0365	3.36251	0.280355	3.53522	0.0407407	1.09148	0.308744		257.422	2.75435	250.939	7.86019	190.779	78.225	257.422	2.75435	NA
JG-AW4-29	73.6033	5664.26	1.24084	37.4081	43.1963	0.0810099	44.082	0.0219787	8.79222	0.199452		140.149	12.1893	79.094	33.555	NA	NA	140.149	12.1893	NA
JG-AW4-30	283.058	157571	2.16947	12.8416	0.391126	2.07682	1.17576	0.193427	1.1088	0.943048		1139.91	11.5849	1141.19	8.05852	1143.6	7.79265	1143.6	7.79265	99.6776
JG-AW4-31	326.246	122982	1.9509	17.5358	1.10952	0.515862	2.02554	0.0656082	1.69463	0.836633		409.642	6.72596	422.383	6.99924	492.542	24.4537	409.642	6.72596	83.169
JG-AW4-32	617.913	103976	3.15629	17.8603	0.8523	0.558563	1.79893	0.0723536	1.58422	0.880643		450.32	6.89058	450.591	6.54635	451.955	18.9455	450.32	6.89058	99.6382
JG-AW4-33	217.32	1.0765e+06	1.44388	12.3749	0.873368	2.29805	1.12706	0.206253	0.712393	0.632078		1208.83	7.85236	1211.69	7.97425	1216.8	17.1939	1216.8	17.1939	99.345
JG-AW4-34	93.0512	9532.93	0.809327	19.8814	10.5638	0.277528	10.6941	0.0400177	1.66395	0.155596		252.943	4.12734	248.695	23.5932	208.82	245.493	252.943	4.12734	NA
JG-AW4-35	361.511	75547.7	1.28563	17.2153	1.84235	0.668025	2.17737	0.0834078	1.16048	0.532972		516.432	5.75931	519.511	8.8545	533.091	40.3515	516.432	5.75931	96.875
JG-AW4-36	349.671	16211	0.752236	21.3755	3.97623	0.131967	5.38251	0.0204587	3.62781	0.674		130.554	4.68863	125.863	6.37163	38.1207	95.1658	130.554	4.68863	NA
JG-AW4-37	199.841	11780.1	0.966756	22.6245	11.311	0.11342	11.7676	0.0186109	3.24615	0.275854		118.871	3.82337	109.089	12.1722	-99.5195	278.617	118.871	3.82337	NA
JG-AW4-38	214.109	18335.6	1.09071	19.7263	5.0816	0.260098	5.28473	0.0372119	1.4511	0.274584		235.528	3.35606	234.746	11.0765	226.93	117.496	235.528	3.35606	NA
JG-AW4-39	163.69	23523.8	1.85454	18.5369	3.24063	0.349352	3.5985	0.0469676	1.56446	0.434753		295.877	4.52425	304.233	9.46023	368.798	73.0198	295.877	4.52425	NA
JG-AW4-40	96.9042	10107.3	1.79672	21.1375	7.68684	0.250888	8.00726	0.038462	2.24248	0.280056		243.293	5.35412	227.297	16.3084	64.866	183.259	243.293	5.35412	NA
JG-AW4-41	130.676	11318.2	1.19	19.948	4.10223	0.267061	4.654	0.0386375	2.19805	0.472292		244.382	5.2711	240.342	9.96057	201.047	95.2692	244.382	5.2711	NA
JG-AW4-42	353.668	22508.4	0.804975	20.8364	5.04338	0.141518	5.1921	0.0213863	1.23379	0.237628		136.411	1.66535	134.395	6.53595	98.8947	119.379	136.411	1.66535	NA
JG-AW4-43	48.0216	2647.83	1.29115	27.9999	81.7622	0.0998166	82.2759	0.0202702	9.18018	0.111578		129.363	11.7574	96.6071	75.9617	-652.743	2752.88	129.363	11.7574	NA
JG-AW4-44	47.5631	7055.94	1.18756	20.9965	30.2199	0.261578	30.5273	0.0398334	4.32106	0.141548		251.8	10.6707	235.938	64.3556	80.7604	732.014	251.8	10.6707	NA
JG-AW4-45	418.352	8941.89	0.913996	18.696	2.1531	0.27945	2.50483	0.0378925	1.27998	0.511003		239.756	3.01246	250.221	5.55513	349.525	48.6565	239.756	3.01246	NA
JG-AW4-46	703.063	244983	12.7657	16.3835	0.355989	0.893922	0.925714	0.106219	0.854528	0.923101		650.754	5.28941	648.474	4.43656	640.564	7.65625	650.754	5.28941	101.591
JG-AW4-47	304.036	24595.9	0.889003	20.8755	7.98596	0.120162	9.85224	0.018193	5.76983	0.585637		116.225	6.64592	115.219	10.7317	94.4615	189.345	116.225	6.64592	NA
JG-AW4-48	266.172	40324	0.771421	18.728	3.31538	0.380082	3.50488	0.0516259	1.13685	0.324362		324.496	3.59772	327.098	9.80141	345.663	75.0178	324.496	3.59772	NA
JG-AW4-49	111.991	7437	0.539753	22.6223	18.1113	0.115058	18.7224	0.0188779	4.74455	0.253415		120.561	5.6669	110.582	19.6185	-99.2862	448.005	120.561	5.6669	NA
JG-AW4-50	571.465	85868.9	5.66153	16.9149	1.61877	0.665302	3.86792	0.0816182	3.51289	0.908212		505.774	17.0882	517.852	15.6916	571.478	35.2191	505.774	17.0882	88.5028
JG-AW4-51	275.009	41580.9	17.8175	18.3437	3.76875	0.345861	4.79092	0.0460138	2.95794	0.617406		290.002	8.38799	301.603	12.5018	392.349	84.5608	290.002	8.38799	NA
JG-AW4-52	126.782	14873.1	0.95924	21.2217	19.6942	0.122827	20.7369	0.0189048	6.49297	0.313111		120.73	7.76604	117.632	23.0372	55.4051	473.674	120.73	7.76604	NA
JG-AW4-53	388.739	101110	0.979092	17.2249	1.7306	0.684038	2.62137	0.0854548	1.9689	0.751097		528.6	9.99235	529.212	10.8119	531.874	37.9194	528.6	9.99235	99.3844
JG-AW4-54	172.388	25420.7	1.61759	18.6186	4.58445	0.404426	4.82895	0.0546116	1.5171	0.314168		342.772	5.06437	344.853	14.1205	358.877	103.524	342.772	5.06437	NA
JG-AW4-55	87.2356	14631	1.17908	17.7443	8.85926	0.521874	8.99493	0.0671619	1.55638	0.173029		419.034	6.31433	426.402	31.3294	466.419	196.585	419.034	6.31433	89.8408
JG-AW4-56	250.78	109540	2.90709	13.6484	1.36445	1.5653	3.47064	0.154945	3.19118	0.919478		928.626	27.5988	956.568	21.5062	1021.37	27.6405	1021.37	27.6405	90.9193
JG-AW4-57	197.079	24552	1.10009	19.5091	3.91947	0.307711	4.14579	0.0435391	1.35104	0.325882		274.733	3.63376	272.405	9.90563	252.477	90.1973	274.733	3.63376	NA
JG-AW4-58	295.212	142833	2.50418	14.139	1.13739	1.38871	4.24687	0.142406	4.09173	0.96347		858.254	32.8804	884.148	25.0746	949.52	23.2786	949.52	23.2786	90.3882
JG-AW4-59	130.232	51786.1	2.80731	17.1376	2.11336	0.655141	4.31494	0.08143	3.76197	0.871847		504.653	18.2608	511.638	17.3439	542.949	46.2038	504.653	18.2608	92.9466
JG-AW4-60	533.769	265125	6.47256	16.4352	0.526868	0.856426	1.32818	0.102085	1.21921	0.917956		626.619	7.28026	628.17	6.22165	633.779	11.3642	626.619	7.28026	98.8703
JG-AW4-61	78.216	10429.3	1.46539	18.8667	9.40838	0.317555	9.77487	0.0434524	2.65151	0.271258		274.197	7.11793	280.02	23.9261	328.961	213.878	274.197	7.11793	NA
JG-AW4-62	216.341	16498.2	1.70195	19.8899	7.27439	0.142169	7.61722	0.0205085	2.2595	0.29663		130.869	2.92717	134.974	9.62748	207.812	168.861	130.869	2.92717	NA
JG-AW4-63	136.178	79228.2	2.3519	14.4519	1.30271	1.43136	2.04628	0.150027	1.57804	0.771174		901.117	13.2708	902.116	12.2325	904.547	26.8295	904.547	26.8295	99.6208
JG-AW4-64	149.859	26478.8	2.09665	19.026	9.09095	0.276442	9.21646	0.0381462	1.51585	0.164472		241.332	3.5906	247.831	20.27	309.848	207.332	241.332	3.5906	NA
JG-AW4-65	296.244	47298.4	2.24485	18.8882	3.29501	0.300232	3.47273	0.0411288	1.09672	0.315808		259.826	2.79289	266.582	8.14231	326.34	74.7906	259.826	2.79289	NA
JG-AW4-66	172.627	62806	1.68962	17.5028	4.73257	0.640955	5.09845	0.0813642	1.89659	0.371992		504.261	9.19926	502.897	20.2235	496.71	104.328	504.261	9.19926	101.52
JG-AW4-67	334.05	239624	1.91131	13.1646	1.03981	1.92565	1.38863	0.183858	0.920375	0.662795		1088.02	9.21439	1090.03	9.28073	1094.07	20.8005	1094.07	20.8005	99.4473
JG-AW4-68	380.395	65476.8	2.10538	19.5436	2.66443	0.278027	2.94853	0.0394086	1.26278	0.428273		249.166	3.08638	249.091	6.5131	248.364	61.3487	249.166	3.08638	NA
JG-AW4-69	216.832	35022.5	0.875709	19.3442	4.13129	0.280544	4.19982	0.0393595	0.755589	0.17991		248.862	1.84454	251.089	9.34284	271.925	94.7315	248.862	1.84454	NA
JG-AW4-70	117.576	11672.5	0.76615	21.9084	19.8528	0.118621	20.0348	0.0188483	2.69381	0.134457		120.373	3.21253	113.821	21.5754	-21.0982	484.508	120.373	3.21253	NA
JG-AW4-71	858.327	112732	0.98575	20.8906	2.96826	0.121335	3.2215	0.0183839	1.25199	0.388635		117.434	1.45695	116.282	3.5395	92.7736	70.3225	117.434	1.45695	NA
JG-AW4-72	351.594	18567.3	15.5603	20.0293	2.39209	0.17574	3.55445	0.0255292	2.62907	0.739656		162.506	4.21899	164.388	5.39468	191.608	55.6562	162.506	4.21899	NA
JG-AW4-73	405.319	14958.3	0.87686	21.639	6.38627	0.130954	6.54021	0.0205521	1.41065	0.215688		131.144	1.83129	124.955	7.68961	8.76278	153.79	131.144	1.83129	NA
JG-AW4-74	503.299	63789.5	0.837642	19.777	1.57861	0.253381	2.01308	0.0363439	1.24918	0.620534		230.131	2.82405	229.319	4.13221	221.008	36.5308	230.131	2.82405	NA
JG-AW4-75	172.37	7187.67	0.902883	17.612	10.1736	0.182053	10.3866	0.0232545	2.09283	0.201492		148.192	3.06602	169.826	16.2444	482.996	225.202	148.192	3.06602	NA
JG-AW4-76	241.297	14187.6	1.36918	18.1972	4.22235	0.332633	4.87172	0.0439003	2.43011	0.49882		276.964	6.58799	291.574	12.3478	410.315	94.4875	276.964	6.58799	NA
JG-AW4-77	40.6607	31337.9	0.693412	13.6238	4.45271	1.75791	5.02486	0.173698	2.32863	0.463423		1032.45	22.2156	1030.08	32.5326	1025.02	90.1454	1025.02	90.1454	100.725
JG-AW4-78	99.0876	8730.12	1.18583	18.1844	7.65188	0.325791	7.95297	0.0429672	2.1676	0.272552		271.199	5.75658	286.348	19.8463	411.883	171.297	271.199	5.75658	NA
JG-AW4-79	296.923	122033	3.28856	16.0546	1.12499	0.928616	1.35575	0.108127	0.756622	0.558082		661.86	4.75928	666.906	6.62838	684.018	24.0279	661.86	4.75928	96.7605
JG-AW4-80	55.7349	7825	1.05386	20.4931	20.6077	0.259115	20.836	0.0385122	3.07631	0.147644		243.604	7.3542	233.954	43.5651	138.097	488.521	243.604	7.3542	NA
JG-AW4-81	151.925	35408	2.676	17.5708	2.32491	0.581173	2.585	0.0740622	1.13006	0.43716		460.583	5.02327	465.215	9.64784	488.165	51.3286	460.583	5.02327	94.3498
JG-AW4-82	104.135	13358.5	1.23622	19.715	6.83678	0.274566	6.96127	0.0392594	1.31062	0.188273		248.241	3.19164	246.338	15.2278	228.233	158.113	248.241	3.19164	NA
JG-AW4-83	531.355	11395.1	0.978411	17.1976	16.8954	0.163269	17.4231	0.0203644	4.25535	0.244236		129.958	5.47481	153.561	24.8351	535.326	372.219	129.958	5.47481	NA
JG-AW4-84	86.8121	13665.1	1.08964	17.5393	5.94737	0.606443	6.00183	0.0771435	0.806645	0.1344		479.05	3.72414	481.314	23.0098	492.133	131.249	479.05	3.72414	97.3416
JG-AW4-85	280.452	50656.5	0.5383	19.489	2.19242	0.279612	2.59071	0.0395225	1.38025	0.532767		249.873	3.38287	250.35	5.7482	254.819	50.3918	249.873	3.38287	NA
JG-AW4-86	362.919	30813.8	1.5094	19.8676	4.29434	0.198321	4.4416	0.0285767	1.13423	0.255366		181.634	2.03141	183.704	7.46402	210.42	99.5902	181.634	2.03141	NA
JG-AW4-87	82.7487	11091.7	1.88296	16.9167	12.4243	0.35179	12.7489	0.0431617	2.85869	0.22423		272.401	7.62486	306.067	33.7006	571.244	271.258	272.401	7.62486	NA
JG-AW4-88	499.667	182571	0.746161	18.7174	1.75156	0.417216	2.14999	0.0566376	1.24678	0.579903		355.144	4.30812	354.058	6.42682	346.957	39.605	355.144	4.30812	NA
JG-AW4-89	91.9508	8239.17	0.719072	20.7588	12.1269	0.273185	12.2863	0.0411299	1.97285	0.160573		259.833	5.02417	245.237	26.7742	107.764	287.326	259.833	5.02417	NA
JG-AW4-90	332.804	31337.4	1.18164	18.6164	1.9707	0.393285	2.43617	0.0531007	1.43222	0.587898		333.53	4.65541	336.766	6.9825	359.148	44.4743	333.53	4.65541	NA
JG-AW4-91	171.644	14541	0.699608	18.5042	5.60166	0.235218	5.93589	0.0315675	1.9637	0.330819		200.351	3.87379	214.497	11.4779	372.772	126.21	200.351	3.87379	NA
JG-AW4-92	191.348	56090.9	1.30581	17.7093	1.98437	0.597096	2.27266	0.076691	1.10782	0.487455		476.342	5.08676	475.389	8.62755	470.816	43.9223	476.342	5.08676	101.174
JG-AW4-93	170.245	16662.7	0.963941	19.9235	6.92486	0.256023	7.64101	0.0369951	3.22975	0.422687		234.18	7.4277	231.457	15.816	203.866	160.863	234.18	7.4277	NA
JG-AW4-94	804.318	90517.5	2.90779	18.9004	1.9612	0.374547	2.12682	0.0513423	0.822823	0.38688		322.757	2.59033	323.018	5.88452	324.906	44.5111	322.757	2.59033	NA
JG-AW4-95	347.382	43637.4	1.88558	19.1353	2.37813	0.376994	2.74542	0.0523202	1.37178	0.499663		328.75	4.39668	324.824	7.63219	296.798	54.2746	328.75	4.39668	NA
JG-AW4-96	133.118	6452.49	1.36514	23.0132	21.8427	0.102028	22.5939	0.0170292	5.77755	0.255713		108.853	6.23623	98.6463	21.2427	-141.543	546.485	108.853	6.23623	NA
JG-AW4-97	175.265	18234.5	1.53468	21.1875	8.39783	0.265127	8.48162	0.040741	1.18927	0.140217		257.424	3.00114	238.79	18.0499	59.2671	200.449	257.424	3.00114	NA
JG-AW4-98	172.794	7817.46	1.13208	22.3167	15.5295	0.131965	15.7502	0.0213593	2.62732	0.166812		136.241	3.54192	125.862	18.6462	-65.9751	381.003	136.241	3.54192	NA
JG-AW4-99	247.819	56569.1	1.38742	19.3982	3.39288	0.294734	3.75345	0.0414659	1.60522	0.427665		261.913	4.12001	262.279	8.67602	265.54	77.8794	261.913	4.12001	NA
JG-AW4-100	68.9822	7913.52	0.887761	18.3798	12.5067	0.401101	12.8602	0.0534678	2.99442	0.232844		335.777	9.7972	342.446	37.3988	387.939	281.781	335.777	9.7972	NA
JG-AW4-101	100.588	14611.1	1.24026	18.7619	11.9674	0.284185	12.397	0.0386704	3.23525	0.26097		244.586	7.76474	253.972	27.8631	341.546	271.775	244.586	7.76474	NA
JG-AW4-102	363.818	118351	93.7454	15.0526	0.923899	1.06289	2.54943	0.116038	2.37613	0.932025		707.717	15.9261	735.248	13.3386	820.093	19.2966	707.717	15.9261	86.2972
JG-AW4-103	128.527	30097.1	4.72451	16.3116	2.92555	0.800016	5.97917	0.0946442	5.21456	0.872121		582.945	29.0643	596.838	26.9895	650.011	62.8377	582.945	29.0643	89.6823
JG-AW4-104	322.452	24688.3	0.680398	19.7694	9.40261	0.135625	9.5081	0.019446	1.41245	0.148552		124.154	1.73684	129.139	11.5305	221.904	217.877	124.154	1.73684	NA
JG-AW4-105	349.317	48766.7	1.29111	19.7219	4.6132	0.19114	4.74003	0.02734	1.08917	0.229781		173.879	1.86852	177.602	7.7234	227.468	106.639	173.879	1.86852	NA
JG-AW4-106	90.8803	9601.77	0.835622	21.6488	13.1702	0.259218	13.273	0.0407004	1.64849	0.124199		257.173	4.15601	234.037	27.7505	7.64238	318.15	257.173	4.15601	NA
JG-AW4-107	166.375	11392.9	0.695066	20.819	13.2602	0.185667	13.7539	0.0280346	3.65187	0.265515		178.236	6.41977	172.925	21.8723	100.897	314.776	178.236	6.41977	NA
JG-WR48
JG-WR48-1	45.1436	322.985	2.52657	244.692	33.9575	0.0102274	34.1119	0.0181582	3.24191	0.0950374		116.005	3.72714	10.332	3.50658	NA	NA	116.005	3.72714	NA
JG-WR48-2	194.83	1294.85	1.20371	26.3123	3.26924	0.102898	4.23687	0.0196451	2.69502	0.636087		125.413	3.34723	99.4483	4.01375	NA	NA	125.413	3.34723	NA
JG-WR48-3	712.242	132114	2.24444	20.7527	1.50644	0.132639	4.10452	0.0199726	3.81808	0.930213		127.483	4.81957	126.466	4.88062	108.435	35.5703	127.483	4.81957	NA
JG-WR48-4	294.088	3662.19	2.05134	21.1512	2.30951	0.179115	3.46091	0.0274887	2.57761	0.744778		174.812	4.44542	167.299	5.33827	63.3052	55.0021	174.812	4.44542	NA
JG-WR48-5	75.5545	2674.15	1.36132	20.8162	2.5975	0.182031	4.48127	0.0274937	3.65168	0.814877		174.843	6.29891	169.806	7.00735	101.231	61.4152	174.843	6.29891	NA
JG-WR48-6	84.3893	815.498	1.17738	32.0562	2.56953	0.120205	3.6571	0.027959	2.60228	0.711569		177.762	4.56265	115.257	3.98467	NA	NA	177.762	4.56265	NA
JG-WR48-7	137.436	2426.44	0.815008	21.6972	2.35647	0.177673	3.64234	0.0279713	2.77736	0.76252		177.839	4.87171	166.056	5.57971	2.26718	56.783	177.839	4.87171	NA
JG-WR48-8	200.564	4065.64	1.0222	20.9302	1.77776	0.195133	3.01341	0.029634	2.43315	0.80744		188.257	4.51434	180.999	4.9958	88.3096	42.1556	188.257	4.51434	NA
JG-WR48-9	146.789	10677.4	1.12105	19.8362	2.03359	0.206762	3.24053	0.0297588	2.523	0.778577		189.039	4.7002	190.832	5.63766	214.103	47.108	189.039	4.7002	NA
JG-WR48-10	137.425	1367.36	1.27273	25.471	14.1838	0.164499	14.3529	0.0304017	2.19668	0.153048		193.062	4.17808	154.634	20.5898	NA	NA	193.062	4.17808	NA
JG-WR48-11	218.882	39129.1	0.878779	19.3459	1.49087	0.216605	2.57497	0.0304051	2.09948	0.815339		193.083	3.99363	199.08	4.65505	271.718	34.1741	193.083	3.99363	NA
JG-WR48-12	1702.86	11559.3	1.25625	17.5895	1.43322	0.253522	2.76351	0.0323561	2.36281	0.855002		205.277	4.7739	229.433	5.67517	485.794	31.6187	205.277	4.7739	NA
JG-WR48-13	490.956	38167.1	7.89002	19.5622	1.50151	0.228007	2.32282	0.0323635	1.77227	0.762985		205.324	3.58156	208.552	4.37921	246.189	34.6005	205.324	3.58156	NA
JG-WR48-14	126.397	4424.17	1.68871	20.6537	1.91987	0.216491	3.16287	0.0324433	2.51353	0.794699		205.822	5.09168	198.985	5.71539	119.736	45.2528	205.822	5.09168	NA
JG-WR48-15	190.492	6071.7	0.968123	19.8314	1.47231	0.225778	3.27534	0.0324879	2.92578	0.893274		206.101	5.93467	206.707	6.12579	214.662	34.1149	206.101	5.93467	NA
JG-WR48-16	961.124	31433.8	1.77493	19.6409	1.16375	0.231857	3.30706	0.0330422	3.09554	0.936038		209.56	6.38272	211.731	6.32031	236.947	26.8406	209.56	6.38272	NA
JG-WR48-17	434.251	16953.1	1.79894	19.8436	1.56633	0.230956	2.62985	0.0332535	2.11251	0.803284		210.879	4.38277	210.988	5.01015	213.188	36.2891	210.879	4.38277	NA
JG-WR48-18	191.972	1829.56	1.14801	22.8983	1.49072	0.203038	3.26855	0.0337339	2.90882	0.88994		213.875	6.11917	187.693	5.60128	NA	NA	213.875	6.11917	NA
JG-WR48-19	997.454	17225.8	4.23822	20.0248	1.216	0.232535	2.75729	0.0337865	2.47467	0.897501		214.203	5.21373	212.289	5.28208	192.136	28.2807	214.203	5.21373	NA
JG-WR48-20	314.602	6783.35	1.17264	20.6533	1.39525	0.230069	3.08657	0.0344775	2.75322	0.891998		218.511	5.91526	210.256	5.86191	119.761	32.8668	218.511	5.91526	NA
JG-WR48-21	271.062	26918.3	1.60946	19.509	1.60117	0.245468	3.00088	0.0347469	2.53802	0.845758		220.189	5.49409	222.888	6.00546	252.493	36.8432	220.189	5.49409	NA
JG-WR48-22	586.45	39830.8	1.79399	19.4322	1.31217	0.246676	4.56364	0.0347806	4.37093	0.957773		220.399	9.47067	223.872	9.16908	261.529	30.1563	220.399	9.47067	NA
JG-WR48-23	1027.89	107460	2.83694	19.7185	1.14557	0.244715	3.12159	0.0350124	2.90379	0.930228		221.843	6.33228	222.274	6.23163	227.832	26.4638	221.843	6.33228	NA
JG-WR48-24	93.0748	2583.81	1.90518	21.8321	3.12224	0.226303	3.81177	0.0358488	2.1866	0.573643		227.05	4.87826	207.142	7.1426	NA	NA	227.05	4.87826	NA
JG-WR48-25	509.337	5801.72	1.87746	20.1437	2.00593	0.248118	3.71842	0.0362649	3.13096	0.842012		229.639	7.06335	225.046	7.50584	178.3	46.7519	229.639	7.06335	NA
JG-WR48-26	433.234	139269	2.24084	19.4763	1.47256	0.258561	3.12507	0.0365391	2.75638	0.882021		231.345	6.26368	233.507	6.51906	256.345	33.8556	231.345	6.26368	NA
JG-WR48-27	94.5736	3173.35	1.65149	20.9465	2.40168	0.2425	3.6709	0.0368563	2.77623	0.756281		233.317	6.36162	220.466	7.27489	86.4589	56.9699	233.317	6.36162	NA
JG-WR48-28	1377.23	18995.4	7.042	19.775	1.1867	0.257657	3.00433	0.0369697	2.76003	0.918683		234.022	6.34325	232.777	6.24975	221.203	27.4344	234.022	6.34325	NA
JG-WR48-29	220.775	4909.9	1.36604	20.3839	2.7638	0.249997	3.68126	0.0369752	2.43169	0.660559		234.057	5.58945	226.574	7.47585	150.594	64.7645	234.057	5.58945	NA
JG-WR48-30	94.4539	1894.1	1.52513	20.0522	3.32969	0.254264	4.52417	0.0369941	3.0629	0.677007		234.174	7.0438	230.034	9.31272	188.914	77.5031	234.174	7.0438	NA
JG-WR48-31	51.9343	8321.28	1.21423	19.9505	3.33427	0.256219	4.88165	0.0370896	3.56556	0.730399		234.768	8.22018	231.615	10.1101	200.752	77.4602	234.768	8.22018	NA
JG-WR48-32	334.302	13734.7	1.95347	19.8722	1.20829	0.259191	2.50924	0.0373727	2.19916	0.876426		236.527	5.10735	234.015	5.24451	209.875	28.0229	236.527	5.10735	NA
JG-WR48-33	110.489	4013.33	1.82289	20.7183	1.8066	0.251134	3.29693	0.0377526	2.75788	0.836502		238.888	6.46767	227.497	6.71966	112.374	42.6429	238.888	6.46767	NA
JG-WR48-34	91.2658	3071.92	1.65278	21.166	4.66503	0.246179	5.43157	0.0378074	2.78199	0.512189		239.228	6.53334	223.468	10.8954	61.6364	111.173	239.228	6.53334	NA
JG-WR48-35	595.735	42199.2	1.30076	18.8245	1.42679	0.277749	6.81211	0.0379371	6.66102	0.97782		240.033	15.6947	248.87	15.0366	334.028	32.3314	240.033	15.6947	NA
JG-WR48-36	79.5314	1225.18	1.32433	24.2942	15.1084	0.21585	15.3405	0.0380488	2.65823	0.173281		240.727	6.28107	198.45	27.6598	NA	NA	240.727	6.28107	NA
JG-WR48-37	143.328	3934.19	1.42767	20.5257	4.25791	0.256317	5.12411	0.0381737	2.85075	0.556339		241.503	6.75727	231.695	10.6156	134.338	100.142	241.503	6.75727	NA
JG-WR48-38	470.037	4342.37	2.40396	20.964	1.43991	0.25191	3.24776	0.0383184	2.91112	0.896347		242.401	6.92556	228.126	6.63579	84.4357	34.1623	242.401	6.92556	NA
JG-WR48-39	23.7424	838.544	0.70508	30.1496	5.42234	0.176172	6.3537	0.0385396	3.31177	0.521234		243.774	7.9225	164.762	9.66355	NA	NA	243.774	7.9225	NA
JG-WR48-40	321.068	8056.64	2.46579	19.8676	1.81085	0.267775	2.95017	0.0386015	2.32901	0.789451		244.158	5.58014	240.913	6.32717	210.417	41.9981	244.158	5.58014	NA
JG-WR48-41	263.17	12770	1.79265	19.6323	1.41861	0.270994	3.53359	0.0386027	3.23633	0.915874		244.166	7.75423	243.488	7.65016	237.971	32.7076	244.166	7.75423	NA
JG-WR48-42	118.832	1699.63	0.876892	23.3346	2.65805	0.228284	3.41794	0.0386513	2.14874	0.628666		244.468	5.15462	208.781	6.45026	NA	NA	244.468	5.15462	NA
JG-WR48-43	209.252	100298	1.43947	18.231	1.62922	0.293355	3.23462	0.0388055	2.79436	0.863889		245.425	6.72913	261.197	7.44968	406.155	36.4664	245.425	6.72913	NA
JG-WR48-44	263.35	9095.51	1.42657	20.4351	2.06018	0.262749	2.99701	0.0389588	2.17663	0.726267		246.376	5.26151	236.88	6.33211	144.716	48.3463	246.376	5.26151	NA
JG-WR48-45	334.97	80673.6	1.74945	19.7241	1.01144	0.272512	3.40615	0.0390006	3.25251	0.954894		246.635	7.87032	244.7	7.4067	227.187	23.3726	246.635	7.87032	NA
JG-WR48-46	184.665	8497.87	1.21189	19.3925	2.10171	0.278297	3.18623	0.0391589	2.39476	0.751597		247.617	5.8174	249.305	7.04353	266.224	48.2287	247.617	5.8174	NA
JG-WR48-47	311.63	12536.3	2.4644	19.7593	1.49885	0.273672	3.02631	0.0392364	2.62907	0.868738		248.098	6.39876	245.625	6.60271	223.046	34.6624	248.098	6.39876	NA
JG-WR48-48	193.226	6705.97	1.39164	19.8021	1.69772	0.277887	3.18613	0.0399272	2.69614	0.846212		252.382	6.67309	248.98	7.0352	218.077	39.3086	252.382	6.67309	NA
JG-WR48-49	321.386	3474.95	1.71758	21.0761	1.1743	0.261811	3.13053	0.0400374	2.90193	0.92698		253.065	7.2015	236.126	6.5955	71.8156	27.9339	253.065	7.2015	NA
JG-WR48-50	436.213	25202.9	3.92697	19.2246	0.811311	0.28746	2.63145	0.0400979	2.50326	0.951285		253.44	6.22117	256.558	5.96587	286.166	18.5712	253.44	6.22117	NA
JG-WR48-51	274.47	3227.61	1.97193	20.1682	2.26771	0.274466	2.70992	0.0401647	1.48364	0.547484		253.854	3.69308	246.258	5.92588	175.47	52.9095	253.854	3.69308	NA
JG-WR48-52	251.158	9167.01	1.52182	20.1237	2.01187	0.275881	3.25482	0.0402826	2.55855	0.786082		254.584	6.38673	247.385	7.1462	180.617	46.897	254.584	6.38673	NA
JG-WR48-53	369.145	51439.1	2.04645	19.1691	1.00884	0.291115	2.57011	0.0404906	2.36383	0.919739		255.873	5.92994	259.436	5.88417	292.746	23.038	255.873	5.92994	NA
JG-WR48-54	215.521	3160.82	1.86731	20.7766	2.80643	0.269158	4.22826	0.040576	3.16262	0.747971		256.402	7.94988	242.02	9.1053	105.691	66.3039	256.402	7.94988	NA
JG-WR48-55	430.781	6654.13	1.96251	19.9082	2.51843	0.281245	3.45853	0.0406261	2.37043	0.685387		256.713	5.96564	251.645	7.70873	205.659	58.4364	256.713	5.96564	NA
JG-WR48-56	77.6857	5983.82	0.984909	19.8225	3.28223	0.284111	4.04173	0.0408634	2.35851	0.583539		258.183	5.96893	253.913	9.08018	215.679	76.0289	258.183	5.96893	NA
JG-WR48-57	381.39	27378.4	1.41563	19.5634	1.37012	0.290645	3.01687	0.0412569	2.6878	0.890923		260.619	6.8652	259.067	6.89841	246.076	31.5529	260.619	6.8652	NA
JG-WR48-58	233.288	1967.36	2.37262	22.2852	1.82172	0.258166	3.43881	0.0417449	2.91664	0.848153		263.64	7.53432	233.188	7.16485	NA	NA	263.64	7.53432	NA
JG-WR48-59	432.074	22029	1.25776	19.9766	1.2538	0.290582	2.88905	0.0421189	2.6028	0.900921		265.953	6.7814	259.017	6.60501	197.721	29.1369	265.953	6.7814	NA
JG-WR48-60	581.561	21931.1	1.52818	18.9594	1.36702	0.308075	3.34479	0.0423808	3.05268	0.912668		267.573	8.00096	272.688	7.99891	317.786	31.1003	267.573	8.00096	NA
JG-WR48-61	269.154	11437	1.67341	19.2652	1.30443	0.309428	3.69079	0.0432535	3.45259	0.935461		272.968	9.22773	273.737	8.85601	281.338	29.8353	272.968	9.22773	NA
JG-WR48-62	257.595	4094.12	1.90208	20.0297	3.91066	0.29767	6.5619	0.0432609	5.26927	0.803011		273.014	14.0855	264.578	15.2849	191.571	90.9848	273.014	14.0855	NA
JG-WR48-63	25.2511	27311.8	1.64696	18.8289	2.65421	0.319531	4.11505	0.0436542	3.14465	0.764183		275.443	8.4793	281.542	10.1184	333.486	60.1814	275.443	8.4793	NA
JG-WR48-64	478.908	8149.36	2.17639	20.0347	1.34516	0.307346	2.90575	0.0446784	2.57565	0.886396		281.767	7.101	272.122	6.93637	190.989	31.3014	281.767	7.101	NA
JG-WR48-65	86.6104	6979.66	1.19107	19.8948	1.8941	0.313052	3.41422	0.0451901	2.84065	0.832004		284.924	7.91741	276.544	8.26542	207.232	43.9535	284.924	7.91741	NA
JG-WR48-66	94.5714	4523.52	3.2054	19.8824	2.44359	0.319655	3.39623	0.0461145	2.35865	0.694492		290.623	6.70257	281.637	8.35329	208.692	56.6637	290.623	6.70257	NA
JG-WR48-67	153.266	6072.45	1.20989	19.481	2.00339	0.355254	3.55034	0.0502156	2.93109	0.825581		315.845	9.03459	308.665	9.44997	255.766	46.0684	315.845	9.03459	NA
JG-WR48-68	144.405	2637.76	2.8464	20.5841	1.67074	0.349463	2.57972	0.0521941	1.9656	0.761942		327.978	6.28548	304.317	6.78343	127.687	39.2981	327.978	6.28548	NA
JG-WR48-69	423.447	14347.5	4.74084	18.8504	1.33375	0.407439	3.17054	0.0557275	2.87635	0.907214		349.59	9.78765	347.029	9.31982	330.931	30.23	349.59	9.78765	NA
JG-WR48-70	171.853	208632	2.34848	18.6235	1.02363	0.430411	2.95389	0.058161	2.77085	0.938037		364.432	9.81776	363.468	9.02522	358.286	23.0923	364.432	9.81776	NA
JG-WR48-71	325.465	44940.8	2.08537	18.2706	1.23122	0.439005	2.92594	0.0581981	2.65428	0.907156		364.658	9.41039	369.551	9.06387	401.305	27.5808	364.658	9.41039	NA
JG-WR48-72	243.081	7031.54	1.47149	18.7452	2.11196	0.434556	3.40924	0.0591047	2.67629	0.785011		370.179	9.62798	366.406	10.4865	343.567	47.7974	370.179	9.62798	NA
JG-WR48-73	169.609	635007	2.20763	17.5833	1.37397	0.510599	3.68895	0.0651432	3.42353	0.92805		406.828	13.4975	418.852	12.6615	486.574	30.3185	406.828	13.4975	83.6107
JG-WR48-74	157.424	9274.28	2.98251	17.8806	1.3869	0.578265	2.74678	0.0750233	2.37093	0.863168		466.349	10.6664	463.346	10.2192	449.433	30.8099	466.349	10.6664	103.764
JG-WR48-75	233.417	41034.8	4.69689	17.3432	1.33903	0.598694	3.18226	0.0753394	2.88683	0.907162		468.244	13.0382	476.405	12.1011	516.826	29.3912	468.244	13.0382	90.6
JG-WR48-76	203.59	22020	3.54254	17.7497	1.47994	0.585133	2.66181	0.0753585	2.21247	0.831189		468.358	9.99482	467.755	9.97723	465.757	32.7839	468.358	9.99482	100.559
JG-WR48-77	271.167	20693.8	52.9553	17.2335	1.52794	0.641205	2.86546	0.0801785	2.4241	0.845973		497.188	11.5993	503.052	11.3678	530.785	33.4612	497.188	11.5993	93.6703
JG-WR48-78	122.936	38417.4	2.13391	17.0552	1.15166	0.65108	2.48863	0.0805708	2.20611	0.886478		499.529	10.604	509.143	9.96483	553.491	25.1242	499.529	10.604	90.2505
JG-WR48-79	598.368	23323	8.25929	16.9798	1.14867	0.701175	2.76898	0.0863864	2.51948	0.909897		534.131	12.9149	539.492	11.589	563.145	25.0262	534.131	12.9149	94.8478
JG-WR48-80	54.4444	8314.96	4.69915	17.2804	2.03637	0.689155	2.86737	0.0864087	2.01866	0.704012		534.263	10.3501	532.293	11.879	524.792	44.6783	534.263	10.3501	101.805
JG-WR48-81	1017.04	33915.5	16.9065	16.294	1.02315	0.749532	2.26426	0.0886144	2.01991	0.892084		547.337	10.5994	567.953	9.85003	652.334	21.9489	547.337	10.5994	83.9045
JG-WR48-82	350.747	10712.8	5.82228	16.4185	1.38991	0.758421	2.97377	0.0903509	2.62896	0.884051		557.612	14.0433	573.099	13.0241	635.965	29.9244	557.612	14.0433	87.6796
JG-WR48-83	76.1224	19958.7	2.47999	16.9808	1.48012	0.741004	2.75284	0.0912993	2.32107	0.843155		563.217	12.5179	562.992	11.8974	563.009	32.231	563.217	12.5179	100.037
JG-WR48-84	703.703	36865.4	3.71468	16.4594	1.06868	0.905649	2.90233	0.108159	2.69841	0.929741		662.047	16.9781	654.742	14.0062	630.606	23.0407	662.047	16.9781	104.986
JG-WR48-85	100.697	34959	3.66849	14.58	1.49104	1.16864	3.04054	0.12363	2.64984	0.871505		751.425	18.795	786.007	16.6384	886.329	30.8247	751.425	18.795	84.7795
JG-WR48-86	332.136	24467.8	2.15508	14.0051	1.1937	1.31623	2.47768	0.133754	2.17117	0.876291		809.248	16.5121	852.863	14.2973	968.936	24.3632	809.248	16.5121	83.5192
JG-WR48-87	147.582	13137.9	4.60081	14.9252	1.68064	1.25794	4.04164	0.136228	3.67563	0.909442		823.3	28.409	826.983	22.867	837.793	35.005	823.3	28.409	98.2701
JG-WR48-88	58.4995	40816.4	1.19757	15.0453	1.2292	1.24859	2.79133	0.136304	2.50611	0.897819		823.728	19.3791	822.767	15.7393	821.099	25.6732	823.728	19.3791	100.32
JG-WR48-89	59.8752	4143.93	1.9501	13.8304	2.54621	1.72497	4.05052	0.173103	3.15016	0.777717		1029.18	29.9655	1017.88	26.0409	994.525	51.7756	994.525	51.7756	103.485
JG-WR48-90	310.364	42916.2	8.38088	13.6982	1.07373	1.45687	2.38282	0.144802	2.12719	0.892719		871.757	17.3447	912.718	14.3479	1014	21.7594	1014	21.7594	85.9723
JG-WR48-91	340.996	35688.4	6.02223	13.5594	0.989864	1.62233	3.11412	0.159613	2.95261	0.948137		954.624	26.1988	978.893	19.5646	1034.6	20.0168	1034.6	20.0168	92.2697
JG-WR48-92	1843.62	176815	3.25651	13.4595	1.03183	1.70551	3.07464	0.16656	2.89633	0.942007		993.128	26.6582	1010.6	19.6826	1049.57	20.8169	1049.57	20.8169	94.6222
JG-WR48-93	1088.21	189416	6.78726	13.0105	0.930671	1.67485	2.84897	0.158109	2.69267	0.945138		946.261	23.6979	999.029	18.1151	1117.61	18.5846	1117.61	18.5846	84.6684
JG-WR48-94	945.134	117345	24.648	12.2732	1.06895	2.23547	2.44392	0.199073	2.19774	0.899272		1170.34	23.5215	1192.24	17.147	1233.03	20.9649	1233.03	20.9649	94.9161
JG-WR48-95	533.648	37790.4	3.33458	11.2689	1.06135	2.72146	2.39449	0.222522	2.14642	0.896399		1295.19	25.1855	1334.33	17.7818	1398.53	20.3448	1398.53	20.3448	92.6109
JG-WR48-96	170.757	512738	2.05088	8.76655	0.998982	5.14598	2.41259	0.327329	2.19605	0.910245		1825.42	34.9116	1843.73	20.5139	1865.23	18.0314	1865.23	18.0314	97.8661
JG-WD23
JG-WD23-1	74.0222	30655.2	2.7874	13.6178	2.33557	1.80849	2.80058	0.178617	1.54543	0.551826		1059.41	15.098	1048.53	18.3134	1025.92	47.2697	1025.92	47.2697	103.265
JG-WD23-2	87.6248	11882.2	1.47158	17.3679	4.81042	0.621651	5.06994	0.0783055	1.6013	0.315843		486	7.49623	490.882	19.7368	513.744	105.737	486	7.49623	94.5998
JG-WD23-3	116.173	13890.4	1.6818	13.1289	1.51966	1.91227	2.32746	0.182085	1.76287	0.757421		1078.36	17.5051	1085.38	15.519	1099.48	30.4042	1099.48	30.4042	98.0784
JG-WD23-4	108.684	2696.37	1.1762	29.1883	26.5369	0.0886533	27.9557	0.0187673	8.79268	0.314522		119.861	10.4416	86.2481	23.1196	-768.426	758.31	119.861	10.4416	NA
JG-WD23-5	63.6992	2024.65	0.494935	19.2387	11.5208	0.227009	12.2828	0.031675	4.25908	0.346751		201.023	8.42963	207.726	23.078	284.459	264.235	201.023	8.42963	NA
JG-WD23-6	150.044	7571.57	1.63839	19.5231	8.50021	0.238877	9.20113	0.0338237	3.52239	0.382822		214.435	7.429	217.5	18.0162	250.788	195.866	214.435	7.429	NA
JG-WD23-7	109.085	22310.9	1.87186	17.6271	4.57134	0.681336	4.64349	0.0871047	0.815431	0.175607		538.391	4.21188	527.582	19.1088	481.061	101.04	538.391	4.21188	111.918
JG-WD23-8	251.678	14215.4	1.47825	19.9958	3.91333	0.286426	4.31604	0.0415384	1.82047	0.421791		262.362	4.68032	255.742	9.7579	195.502	91.0046	262.362	4.68032	NA
JG-WD23-9	144.448	9818.27	1.67596	17.592	6.59499	0.358318	6.97079	0.0457174	2.25789	0.323908		288.175	6.3634	310.958	18.6736	485.495	145.731	288.175	6.3634	NA
JG-WD23-10	450.289	28985.3	1.10906	20.2063	3.57462	0.215084	4.00645	0.0315205	1.80935	0.451609		200.057	3.56415	197.81	7.20109	171.065	83.4526	200.057	3.56415	NA
JG-WD23-11	84.2386	10827.8	0.644538	20.7887	19.4636	0.233792	19.7426	0.0352498	3.30747	0.16753		223.321	7.25982	213.324	38.0036	104.357	463.811	223.321	7.25982	NA
JG-WD23-12	147.42	8510.85	1.70274	20.2314	7.31767	0.281544	8.15085	0.0413114	3.58998	0.440443		260.957	9.18122	251.882	18.1841	168.17	171.122	260.957	9.18122	NA
JG-WD23-13	281.95	28592.9	1.31154	22.6579	7.41847	0.123853	7.5671	0.0203528	1.49241	0.197223		129.885	1.91902	118.559	8.4677	-103.149	182.576	129.885	1.91902	NA
JG-WD23-14	371.55	30983.9	1.15547	21.0019	4.25457	0.19781	4.51833	0.0301304	1.52115	0.336663		191.364	2.86816	183.271	7.57663	80.1523	101.03	191.364	2.86816	NA
JG-WD23-15	374.562	26165.5	2.67903	19.5306	1.99528	0.277462	3.14027	0.0393023	2.4249	0.772196		248.507	5.91137	248.642	6.92563	249.901	45.92	248.507	5.91137	NA
JG-WD23-16	177.938	5021.93	1.54213	25.5727	13.2132	0.0998138	13.4878	0.0185125	2.70816	0.200785		118.248	3.17316	96.6044	12.4298	-409.769	346.518	118.248	3.17316	NA
JG-WD23-17	184.521	25779.2	1.27801	19.0917	4.63928	0.281538	5.05209	0.0389835	2.00016	0.395908		246.529	4.83789	251.877	11.27	301.977	105.811	246.529	4.83789	NA
JG-WD23-18	76.0378	10127.6	1.59675	18.8581	12.3601	0.379274	12.5601	0.0518741	2.23262	0.177755		326.017	7.09775	326.504	35.0831	329.955	281.305	326.017	7.09775	NA
JG-WD23-19	294.906	9183.38	0.951896	22.3724	11.3176	0.118276	11.5346	0.0191914	2.2271	0.193079		122.544	2.70339	113.507	12.388	-72.068	277.331	122.544	2.70339	NA
JG-WD23-20	238.324	8579.37	1.69003	19.0425	5.7204	0.276093	7.03106	0.0381311	4.08814	0.58144		241.238	9.67991	247.554	15.4475	307.834	130.371	241.238	9.67991	NA
JG-WD23-21	409.049	58639.8	1.34804	19.8657	2.07208	0.251539	3.00091	0.0362416	2.1707	0.723347		229.495	4.894	227.826	6.12419	210.635	48.0531	229.495	4.894	NA
JG-WD23-22	146.022	9980.64	0.938035	18.9835	8.65675	0.314543	9.02888	0.0433067	2.5654	0.284133		273.297	6.86463	277.696	21.94	314.924	197.227	273.297	6.86463	NA
JG-WD23-23	237.402	41255.3	1.56585	20.3931	5.28386	0.225624	5.5365	0.0333709	1.65335	0.298628		211.611	3.44188	206.58	10.3492	149.556	123.897	211.611	3.44188	NA
JG-WD23-24	211.546	8042.31	1.7524	21.8705	12.0945	0.140285	12.3417	0.022252	2.45771	0.199139		141.873	3.44874	133.298	15.4183	-16.9145	293.362	141.873	3.44874	NA
JG-WD23-25	288.097	13518.3	1.5357	20.7615	7.37009	0.148476	9.00026	0.0223569	5.16589	0.573972		142.535	7.28239	140.565	11.8151	107.462	174.28	142.535	7.28239	NA
JG-WD23-26	48.1646	1396.55	1.03908	32.1046	67.8135	0.0900948	68.2016	0.0209781	7.26537	0.106528		133.835	9.62335	87.5917	57.2955	-1044.97	2270.3	133.835	9.62335	NA
JG-WD23-27	98.2394	6558.86	1.41985	20.7002	12.1675	0.283145	12.3298	0.0425091	1.99412	0.161732		268.367	5.2417	253.15	27.633	114.4	287.937	268.367	5.2417	NA
JG-WD23-28	346.812	24901.3	1.62387	20.9802	8.99198	0.148034	9.06846	0.0225253	1.17532	0.129606		143.596	1.66906	140.175	11.8738	82.5985	213.755	143.596	1.66906	NA
JG-WD23-29	214.399	36670.5	1.18271	17.5296	3.26038	0.646326	4.17727	0.0821716	2.61142	0.62515		509.072	12.7827	506.215	16.6532	493.348	71.9174	509.072	12.7827	103.187
JG-WD23-30	454.461	81795.3	1.4075	13.4675	0.501202	1.64929	1.76509	0.161096	1.69243	0.958838		962.863	15.1372	989.28	11.1579	1048.36	10.1227	1048.36	10.1227	91.8446
JG-WD23-31	123.777	11118.1	0.884738	21.7817	18.6382	0.124305	19.1246	0.0196373	4.28543	0.22408		125.363	5.32045	118.968	21.473	-7.07898	453.181	125.363	5.32045	NA
JG-WD23-32	197.898	18648.6	1.30266	20.3249	6.68069	0.27267	6.99163	0.0401943	2.06188	0.294907		254.037	5.13608	244.827	15.2112	157.413	156.51	254.037	5.13608	NA
JG-WD23-33	235.485	16842	0.937658	20.7633	2.63269	0.268584	3.90331	0.040446	2.8818	0.738297		255.597	7.22168	241.561	8.39139	107.254	62.1785	255.597	7.22168	NA
JG-WD23-34	233.799	11526.7	1.84674	19.8741	3.35647	0.289373	3.70539	0.0417105	1.56973	0.423633		263.426	4.05172	258.066	8.44411	209.634	77.8277	263.426	4.05172	NA
JG-WD23-35	415.787	265490	6.40066	13.7026	0.681061	1.63252	3.98216	0.16224	3.92348	0.985266		969.215	35.3067	982.83	25.0797	1013.35	13.8033	1013.35	13.8033	95.6446
JG-WD23-36	153.226	75522.2	2.18722	16.6373	2.32757	0.775495	2.72033	0.0935751	1.40806	0.517607		576.646	7.76697	582.911	12.0651	607.372	50.3468	576.646	7.76697	94.9412
JG-WD23-37	535.521	21264.9	0.720269	20.5994	5.89398	0.124929	6.04892	0.0186645	1.36034	0.224889		119.21	1.60675	119.53	6.82105	125.893	138.837	119.21	1.60675	NA
JG-WD23-38	467.604	39609.2	1.69091	20.5734	4.04099	0.153079	4.13446	0.0228413	0.874141	0.211428		145.588	1.25838	144.627	5.57326	128.908	95.1164	145.588	1.25838	NA
JG-WD23-39	540.752	66657.2	1.82367	18.7778	1.71967	0.382637	1.83026	0.052111	0.626583	0.342345		327.469	2.00062	328.976	5.14311	339.675	38.9233	327.469	2.00062	NA
JG-WD23-40	206.308	10367.8	0.782396	23.0502	12.8029	0.125966	13.1433	0.0210585	2.97197	0.226121		134.342	3.9513	120.467	14.9312	-145.524	318.433	134.342	3.9513	NA
JG-WD23-41	290.996	238079	1.25079	8.1205	0.35456	5.97839	2.65618	0.3521	2.63241	0.991051		1944.62	44.1911	1972.7	23.1095	2002.27	6.29539	2002.27	6.29539	97.1207
JG-WD23-42	406.314	7738.74	0.857235	18.8592	5.01361	0.256572	5.48353	0.0350938	2.22098	0.405028		222.35	4.85416	231.901	11.3692	329.826	113.799	222.35	4.85416	NA
JG-WD23-43	42.7948	1527.97	0.586608	10.9844	109.738	0.225147	110.162	0.0179366	9.65521	0.0876458		114.602	10.9673	206.185	208.439	1447.39	72.1292	114.602	10.9673	NA
JG-WD23-44	109.713	11022.9	0.883823	19.6235	6.35311	0.293304	6.54052	0.041744	1.5545	0.237673		263.634	4.01553	261.157	15.0623	238.965	146.618	263.634	4.01553	NA
JG-WD23-45	196.943	30191.4	1.73611	19.9811	6.59581	0.261022	7.14542	0.0378264	2.74814	0.384602		239.346	6.45695	235.49	15.0191	197.178	153.396	239.346	6.45695	NA
JG-WD23-46	581.808	55718.4	2.15136	19.8598	3.80054	0.217623	4.1176	0.0313458	1.58447	0.384803		198.965	3.10438	199.93	7.47265	211.332	88.1257	198.965	3.10438	NA
JG-WD23-47	522.295	34297.2	1.28468	19.4667	2.19488	0.280162	2.80715	0.0395549	1.75003	0.623417		250.074	4.29255	250.786	6.23801	257.467	50.4331	250.074	4.29255	NA
JG-WD23-48	62.0041	3155.23	0.585426	18.4665	21.5932	0.153754	22.0682	0.0205926	4.55429	0.206373		131.4	5.92376	145.221	29.8701	377.356	490.826	131.4	5.92376	NA
JG-WD23-49	291.679	31179	1.61468	20.8987	5.75777	0.130313	6.30588	0.0197517	2.57142	0.407782		126.087	3.21072	124.379	7.38196	91.8519	136.48	126.087	3.21072	NA
JG-WD23-50	121.016	20755.1	2.15737	16.5873	2.25349	0.773185	4.76119	0.0930163	4.19413	0.880899		573.351	23.0088	581.588	21.0832	613.869	48.683	573.351	23.0088	93.3996
JG-WD23-51	196.336	20567.4	0.890603	20.3085	4.87017	0.268502	5.39546	0.0395479	2.32214	0.430389		250.03	5.6949	241.495	11.5967	159.319	114.002	250.03	5.6949	NA
JG-WD23-52	668.646	9730.88	11.1464	15.7157	0.693839	0.925552	2.91008	0.105495	2.82615	0.971161		646.533	17.3856	665.292	14.2039	729.399	14.7048	646.533	17.3856	88.639
JG-WD23-53	119.089	16314.1	1.25898	20.7089	8.44216	0.253727	8.63084	0.0381086	1.7948	0.207952		241.098	4.24732	229.599	17.7374	113.425	199.48	241.098	4.24732	NA
JG-WD23-54	131.297	4067	0.915703	20.7754	16.8458	0.13113	16.9928	0.0197583	2.23078	0.131278		126.128	2.78631	125.113	20.0052	105.834	400.463	126.128	2.78631	NA
JG-WD23-55	215.753	74598.3	1.58836	13.2959	0.677003	1.73045	1.8056	0.166869	1.67387	0.927046		994.836	15.431	1019.92	11.6197	1074.16	13.596	1074.16	13.596	92.6149
JG-WD23-56	264.746	22622.1	1.8966	12.6931	0.868382	2.03315	1.4386	0.187169	1.14694	0.797263		1106.02	11.6568	1126.67	9.79168	1166.67	17.2047	1166.67	17.2047	94.8015
JG-WD23-57	85.7652	28325.5	0.918414	14.3837	4.04548	1.38151	5.37232	0.14412	3.53496	0.657994		867.92	28.7051	881.084	31.6544	914.314	83.2608	867.92	28.7051	94.9257
JG-WD23-58	211.675	50021.9	1.93243	17.5427	2.72344	0.560313	4.47742	0.0712897	3.5539	0.793737		443.921	15.2456	451.73	16.3273	491.698	60.0897	443.921	15.2456	90.2833
JG-WD23-59	100.372	9485.71	1.11025	19.8639	9.59765	0.261381	9.89404	0.0376563	2.40357	0.242931		238.289	5.62287	235.779	20.8205	210.863	222.861	238.289	5.62287	NA
JG-WD23-60	786.734	56106.4	2.30009	18.4737	1.54669	0.415284	2.04107	0.0556415	1.33182	0.652509		349.064	4.52529	352.673	6.08129	376.478	34.8008	349.064	4.52529	NA
JG-WD23-61	248.578	163389	1.36211	15.0169	1.1387	1.21463	3.34942	0.132289	3.14991	0.940436		800.912	23.7239	807.317	18.6548	825.026	23.7651	800.912	23.7239	97.0772
JG-WD23-62	290.115	25241.4	1.37422	19.9273	6.1555	0.280503	6.39688	0.0405402	1.74066	0.27211		256.18	4.37178	251.057	14.2293	203.446	142.982	256.18	4.37178	NA
JG-WD23-63	490.777	42846.1	2.16033	19.6888	1.93924	0.254825	3.12174	0.0363882	2.44634	0.783649		230.406	5.53699	230.488	6.43711	231.303	44.804	230.406	5.53699	NA
JG-WD23-64	245.734	28625	0.789378	19.5204	4.98092	0.247691	5.39298	0.035067	2.06752	0.383373		222.183	4.51541	224.699	10.8712	251.097	114.656	222.183	4.51541	NA
JG-WD23-65	85.1827	10075.5	1.09185	16.9321	5.44854	0.789456	6.04366	0.0969474	2.61518	0.432715		596.495	14.8995	590.863	27.0794	569.315	118.676	596.495	14.8995	104.774
JG-WD23-66	543.65	20692.8	1.17737	20.809	6.26918	0.121417	6.38685	0.0183244	1.22034	0.191071		117.057	1.41561	116.356	7.02159	102.028	148.364	117.057	1.41561	NA
JG-WD23-67	78.697	13121.4	1.39093	17.2913	8.56153	0.642222	8.70766	0.0805401	1.58857	0.182433		499.346	7.633	503.681	34.5902	523.401	188.068	499.346	7.633	95.404
JG-WD23-68	248.964	64361.9	9.74575	15.0523	2.50676	0.98588	8.04822	0.107628	7.64788	0.950257		658.959	47.907	696.616	40.5912	820.13	52.3627	658.959	47.907	80.3481
JG-WD23-69	276.982	204086	0.913201	7.7712	0.217	6.76124	0.933866	0.381077	0.908304	0.972628		2081.31	16.1564	2080.66	8.26074	2080	3.82009	2080	3.82009	100.063
JG-WD23-70	325.088	18147.4	0.678762	20.5483	3.34608	0.124268	4.17439	0.0185198	2.49586	0.597897		118.294	2.92552	118.934	4.68508	131.746	78.7065	118.294	2.92552	NA
JG-WD23-71	214.798	95883.9	3.67862	17.6779	4.53498	0.582084	4.61176	0.0746303	0.838032	0.181716		463.992	3.75176	465.8	17.2304	474.714	100.346	463.992	3.75176	97.7413
JG-WD23-72	196.273	15966.5	8.6227	20.5795	5.76353	0.195574	7.06336	0.0291908	4.08322	0.578085		185.482	7.46571	181.374	11.7326	128.21	135.707	185.482	7.46571	NA
JG-WD23-73	95.1146	3478.86	2.29703	19.1679	13.1084	0.315602	13.2766	0.0438746	2.10622	0.158642		276.805	5.70672	278.514	32.3503	292.888	300.441	276.805	5.70672	NA
JG-WD23-74	79.2932	9566.36	0.938894	20.3811	14.754	0.274053	15.0747	0.0405099	3.09289	0.205171		255.993	7.76245	245.929	32.9366	150.941	347.327	255.993	7.76245	NA
JG-WD23-75	364.796	8207.85	0.688279	19.5288	6.44928	0.128666	7.20781	0.0182237	3.21858	0.446541		116.42	3.71344	122.898	8.34335	250.116	148.535	116.42	3.71344	NA
JG-WD23-76	93.8854	28006.7	0.963768	21.6014	11.2722	0.218681	12.7396	0.0342604	5.93587	0.465939		217.157	12.6755	200.811	23.2157	12.9423	271.76	217.157	12.6755	NA
JG-WD23-77	92.9504	11234.8	0.666454	19.7973	8.62903	0.242991	10.0608	0.0348895	5.17291	0.514166		221.077	11.2423	220.866	19.9728	218.625	200.019	221.077	11.2423	NA
JG-WD23-78	758.178	84023.8	2.57998	18.4175	0.671858	0.408505	2.86683	0.0545664	2.78699	0.972151		342.496	9.29621	347.798	8.44269	383.34	15.0977	342.496	9.29621	NA
JG-WD23-79	154.61	35054.6	1.43419	17.4172	3.38767	0.705326	3.63021	0.0890977	1.30465	0.359387		550.199	6.88037	541.967	15.2467	507.472	74.5438	550.199	6.88037	108.419
JG-WD23-80	79.6241	6816.96	0.830143	18.6047	18.2502	0.267493	18.4583	0.0360938	2.76393	0.149739		228.575	6.20696	240.687	39.5737	360.564	414.797	228.575	6.20696	NA
JG-WD23-81	197.113	8794.28	1.90884	23.6323	12.6147	0.125256	12.7421	0.0214686	1.79754	0.141071		136.931	2.43543	119.826	14.4028	-207.73	317.573	136.931	2.43543	NA
JG-WD23-82	148.851	22097.5	1.07336	18.6957	4.43593	0.418092	5.00806	0.0566909	2.32448	0.464148		355.469	8.03913	354.686	14.9933	349.549	100.322	355.469	8.03913	NA
JG-WD23-83	193.802	100024	3.50631	12.8014	0.797365	2.06164	1.80788	0.191412	1.62254	0.897483		1129.02	16.8044	1136.16	12.3617	1149.82	15.8347	1149.82	15.8347	98.1908
JG-WD23-84	141.354	18574.6	1.0575	19.7255	8.83844	0.30228	8.88866	0.043245	0.943527	0.10615		272.916	2.52129	268.18	20.9524	227.031	204.566	272.916	2.52129	NA
JG-WD23-85	49.4063	7333.75	1.04653	21.8422	14.0858	0.287242	14.4547	0.0455032	3.24481	0.224482		286.855	9.10385	256.386	32.7625	-13.7728	341.845	286.855	9.10385	NA
JG-WD23-86	74.8786	8603.05	1.13819	18.6143	11.2253	0.312898	11.6467	0.0422424	3.10435	0.266544		266.717	8.11088	276.425	28.1912	359.395	254.009	266.717	8.11088	NA
JG-WD23-87	140.641	15214.3	2.28655	20.1347	6.0863	0.28137	6.34298	0.0410886	1.78615	0.281594		259.577	4.54432	251.744	14.1434	179.348	141.986	259.577	4.54432	NA
JG-WD23-88	350.849	31862.7	1.19326	19.952	3.25768	0.263842	3.77349	0.0381793	1.90439	0.504677		241.537	4.51471	237.758	7.99895	200.588	75.6834	241.537	4.51471	NA
JG-WD23-89	642.677	42411.5	0.750268	20.1403	3.14628	0.148811	3.42494	0.021737	1.35321	0.395104		138.625	1.85585	140.862	4.50477	178.696	73.3875	138.625	1.85585	NA
JG-WD23-90	1197.3	185991	4.41117	19.3087	0.754863	0.303031	1.25052	0.0424363	0.996988	0.797258		267.917	2.61635	268.765	2.95294	276.139	17.2873	267.917	2.61635	NA
JG-WD23-91	244.809	40170.9	1.31855	16.7631	2.88417	0.786629	3.05846	0.0956365	1.01771	0.332753		588.786	5.72664	589.258	13.674	591.096	62.5313	588.786	5.72664	99.6092
JG-WD23-92	361.783	22718.8	1.39803	21.1885	4.55633	0.139316	6.14015	0.0214091	4.11599	0.67034		136.556	5.56151	132.434	7.62383	59.1458	108.632	136.556	5.56151	NA
JG-WD23-93	66.7372	6589.42	1.34836	20.1295	10.2947	0.290366	10.7836	0.0423913	3.21018	0.297689		267.639	8.41577	258.847	24.6441	179.946	240.473	267.639	8.41577	NA
JG-WD23-94	146.649	14107.4	2.31606	18.0353	4.05166	0.432475	4.86218	0.0565695	2.68791	0.55282		354.729	9.27721	364.933	14.9062	430.268	90.3136	354.729	9.27721	NA
JG-WD23-95	31.4655	3860.43	1.04697	18.3801	43.0327	0.310057	43.3907	0.0413321	5.5625	0.128196		261.084	14.2327	274.225	104.643	387.901	1010.3	261.084	14.2327	NA
JG-WD23-96	159.189	3274.5	0.798722	20.0147	13.6108	0.139845	13.7511	0.0203	1.95933	0.142485		129.552	2.51301	132.906	17.1321	193.303	317.712	129.552	2.51301	NA
JG-WD23-97	297.225	12484.1	1.39797	22.3992	12.52	0.120384	12.716	0.0195569	2.2237	0.174874		124.855	2.74967	115.42	13.8742	-74.9914	307.13	124.855	2.74967	NA
JG-CL39
JG-CL39-1	223.299	65835.1	0.754483	17.4026	2.72863	0.670066	2.81131	0.0845729	0.676799	0.240742		523.36	3.40213	520.752	11.4536	509.331	60.0224	523.36	3.40213	102.755
JG-CL39-2	215.662	27065	0.634241	19.5025	3.92075	0.195386	4.10948	0.0276365	1.23108	0.29957		175.739	2.13427	181.215	6.82039	253.233	90.2037	175.739	2.13427	NA
JG-CL39-3	125.959	48213.4	2.79117	17.4479	2.69042	0.618618	2.79499	0.0782823	0.757375	0.270976		485.862	3.54454	488.981	10.8469	503.62	59.2181	485.862	3.54454	96.4739
JG-CL39-4	273.425	865677	0.900982	12.7792	0.570941	1.96658	2.03574	0.18227	1.95404	0.959866		1079.36	19.4201	1104.14	13.7036	1153.26	11.321	1153.26	11.321	93.5924
JG-CL39-5	150.443	22079.2	1.09357	18.8011	5.3926	0.411478	5.61974	0.0561085	1.58157	0.281431		351.916	5.4166	349.939	16.6363	336.846	122.245	351.916	5.4166	NA
JG-CL39-6	386.674	25473.6	2.09616	19.7885	1.52868	0.265419	2.36401	0.0380929	1.80324	0.762789		241.001	4.26558	239.024	5.03477	219.67	35.3939	241.001	4.26558	NA
JG-CL39-7	12.9133	2480.72	5.22428	12.4489	36.9625	0.948843	37.3289	0.0856691	5.21667	0.139749		529.872	26.5363	677.5	186.614	1205.04	754.329	529.872	26.5363	43.9713
JG-CL39-8	63.8955	7849.23	0.988563	18.9911	15.4882	0.298583	16.359	0.0411258	5.26597	0.321901		259.808	13.4094	265.293	38.2108	313.992	354.209	259.808	13.4094	NA
JG-CL39-9	123.352	10667.6	0.918011	20.1139	5.77348	0.29491	5.98256	0.0430213	1.56779	0.262061		271.533	4.16867	262.417	13.8355	181.757	134.619	271.533	4.16867	NA
JG-CL39-10	227.164	30886.9	1.79971	19.5639	3.46653	0.3026	3.6548	0.0429362	1.15792	0.31682		271.007	3.07299	268.429	8.62109	245.994	79.8739	271.007	3.07299	NA
JG-CL39-11	60.3872	8499.78	0.87176	19.2281	12.9559	0.284703	13.4755	0.0397034	3.70591	0.275011		250.994	9.12287	254.382	30.3315	285.734	297.31	250.994	9.12287	NA
JG-CL39-12	226.983	64292.2	1.00992	13.3594	0.637391	1.92071	2.10835	0.1861	2.00969	0.953207		1100.21	20.327	1088.31	14.079	1064.6	12.8193	1064.6	12.8193	103.346
JG-CL39-13	501.559	160286	6.34809	13.3745	0.300921	1.76348	1.63982	0.17106	1.61197	0.983018		1017.95	15.1791	1032.13	10.6256	1062.31	6.05379	1062.31	6.05379	95.8235
JG-CL39-14	170.629	89375.3	1.14494	20.0618	4.63528	0.266594	4.80946	0.0387899	1.28261	0.266684		245.328	3.08747	239.967	10.2791	187.8	107.945	245.328	3.08747	NA
JG-CL39-15	164.696	12981.3	0.666453	20.3846	10.1389	0.135349	10.7538	0.0200105	3.5844	0.333313		127.722	4.53302	128.893	13.018	150.512	238.1	127.722	4.53302	NA
JG-CL39-16	138.296	11623.1	0.739537	21.3618	18.6072	0.135429	18.9146	0.0209821	3.39613	0.179551		133.86	4.49918	128.965	22.9115	39.6969	448.464	133.86	4.49918	NA
JG-CL39-17	169.526	99379.1	1.85679	13.2766	0.860133	1.90113	1.01732	0.183061	0.543248	0.533997		1083.68	5.41884	1081.48	6.76924	1077.09	17.2661	1077.09	17.2661	100.612
JG-CL39-18	211.458	23996.6	1.28595	20.441	4.80045	0.228076	5.12997	0.0338128	1.80896	0.352626		214.367	3.81405	208.609	9.67415	144.079	112.694	214.367	3.81405	NA
JG-CL39-19	211.932	49192	0.791153	19.3664	3.86138	0.258393	4.14679	0.0362934	1.51183	0.364578		229.817	3.41324	233.371	8.64604	269.298	88.5795	229.817	3.41324	NA
JG-CL39-20	247.426	51309.5	4.20273	18.2439	1.50723	0.436786	5.59539	0.0577944	5.38857	0.963037		362.198	18.9792	367.984	17.2735	404.575	33.746	362.198	18.9792	NA
JG-CL39-21	87.5101	18989.8	1.59024	17.2858	4.1404	0.671218	4.36208	0.0841497	1.37289	0.314733		520.844	6.86939	521.453	17.7909	524.097	90.8355	520.844	6.86939	99.3795
JG-CL39-22	140.919	18362.9	0.828219	19.6913	7.14392	0.281028	7.29536	0.040135	1.47876	0.202698		253.67	3.67831	251.473	16.2519	231.006	165.148	253.67	3.67831	NA
JG-CL39-23	365.399	20304	1.23019	20.101	4.68492	0.157312	5.41608	0.0229339	2.71761	0.501766		146.171	3.92767	148.347	7.47538	183.25	109.19	146.171	3.92767	NA
JG-CL39-24	108.873	7102.64	1.08044	18.5389	22.413	0.163759	22.531	0.0220185	2.30282	0.102207		140.4	3.19821	153.988	32.2031	368.552	510.689	140.4	3.19821	NA
JG-CL39-25	69.167	9937.37	2.14468	27.8852	30.1424	0.118005	30.5262	0.0238657	4.82553	0.158078		152.041	7.25093	113.262	32.7273	-641.472	842.027	152.041	7.25093	NA
JG-CL39-26	138.663	11511.5	0.707585	21.62	9.5905	0.228152	9.97326	0.0357749	2.73647	0.27438		226.59	6.09286	208.672	18.8143	10.8742	231.133	226.59	6.09286	NA
JG-CL39-27	84.4031	38377.5	8.43569	15.402	3.49241	1.01159	4.82074	0.113	3.32305	0.689323		690.149	21.7491	709.675	24.6203	771.936	73.5069	690.149	21.7491	89.4049
JG-CL39-28	316.754	38152.7	5.84464	16.7499	0.865909	0.75143	1.69299	0.0912853	1.45479	0.859303		563.134	7.84479	569.054	7.37544	592.76	18.7636	563.134	7.84479	95.0021
JG-CL39-29	215.38	22277.4	1.16828	19.5294	6.85136	0.301625	6.89292	0.0427222	0.755762	0.109643		269.684	1.99613	267.668	16.22	250.045	157.802	269.684	1.99613	NA
JG-CL39-30	761.301	123411	1.73709	19.0542	1.12149	0.308816	1.57016	0.0426767	1.09894	0.69989		269.403	2.89957	273.263	3.76182	306.454	25.5357	269.403	2.89957	NA
JG-CL39-31	71.2892	11941.1	0.668222	17.4768	8.27043	0.285437	8.6692	0.0361804	2.59904	0.299802		229.113	5.85017	254.962	19.5489	499.989	182.403	229.113	5.85017	NA
JG-CL39-32	363.517	77622.5	2.82953	19.4252	1.86584	0.275934	2.0193	0.038875	0.772151	0.382385		245.856	1.86263	247.427	4.43416	262.37	42.8572	245.856	1.86263	NA
JG-CL39-33	89.865	15094	0.683229	19.8603	9.44498	0.278137	9.55606	0.0400631	1.45281	0.15203		253.224	3.60755	249.179	21.118	211.242	219.285	253.224	3.60755	NA
JG-CL39-34	142.924	21491.4	0.371279	17.5484	4.79543	0.311198	4.9058	0.039607	1.03474	0.210922		250.397	2.54129	275.109	11.823	490.944	105.834	250.397	2.54129	NA
JG-CL39-35	286.896	263863	1.71937	13.1118	0.430619	1.96517	0.665894	0.18688	0.507919	0.762763		1104.45	5.15548	1103.66	4.48114	1102.11	8.59342	1102.11	8.59342	100.213
JG-CL39-36	138.244	17067.8	0.678467	21.2718	6.06209	0.248486	6.41326	0.0383358	2.09307	0.326366		242.509	4.98159	225.345	12.9614	49.789	144.863	242.509	4.98159	NA
JG-CL39-37	12.3592	3464.96	4.58566	19.7966	34.3022	0.58515	34.5343	0.0840151	3.99639	0.115723		520.044	19.9669	467.765	130.151	218.685	815.417	520.044	19.9669	237.805
JG-CL39-38	136.87	16845.1	0.791957	20.3288	5.49793	0.242828	5.66263	0.0358021	1.35579	0.239427		226.76	3.02093	220.734	11.2345	156.941	128.775	226.76	3.02093	NA
JG-CL39-39	80.1815	16831.8	1.59517	17.3148	4.80561	0.718883	5.0778	0.0902765	1.64017	0.323008		557.172	8.75479	550.007	21.5667	520.421	105.509	557.172	8.75479	107.062
JG-CL39-40	622.416	242256	2.31296	17.2591	0.592758	0.673935	0.716515	0.0843599	0.402531	0.56179		522.094	2.01874	523.102	2.92911	527.526	13.0031	522.094	2.01874	98.9704
JG-CL39-41	451.315	58063.3	0.731086	18.329	1.44269	0.437349	3.40781	0.0581385	3.08736	0.905967		364.295	10.9352	368.381	10.529	394.152	32.3595	364.295	10.9352	NA
JG-CL39-42	252.342	25745.2	2.67507	18.6755	2.25977	0.366458	2.43741	0.0496358	0.91346	0.374766		312.285	2.78461	317.025	6.63733	352.013	51.0462	312.285	2.78461	NA
JG-CL39-43	134.582	95612.4	1.65656	14.6581	2.28583	1.37271	2.97399	0.145934	1.90252	0.63972		878.129	15.6187	877.325	17.4722	875.301	47.3399	878.129	15.6187	100.323
JG-CL39-44	151.11	49309	2.2131	13.9259	0.713931	1.59983	1.00651	0.161584	0.70948	0.704892		965.571	6.36217	970.144	6.289	980.496	14.5335	980.496	14.5335	98.4778
JG-CL39-45	297.672	24750.1	0.677833	19.7053	2.04159	0.274427	2.5905	0.0392202	1.59456	0.615541		247.997	3.87937	246.227	5.66409	229.364	47.1842	247.997	3.87937	NA
JG-CL39-46	226.695	258986	2.18757	10.1852	0.465424	3.66891	1.00261	0.271022	0.888033	0.885723		1545.99	12.2067	1564.63	8.00003	1589.86	8.69661	1589.86	8.69661	97.2405
JG-CL39-47	16.7524	5335.05	3.50761	22.1055	18.6138	0.548449	20.946	0.0879298	9.60532	0.458575		543.282	50.0465	443.98	75.4692	-42.8222	455.661	543.282	50.0465	NA
JG-CL39-48	124.413	7731.89	1.12618	20.2732	8.33187	0.262537	8.46774	0.0386022	1.51083	0.178422		244.163	3.6199	236.709	17.8809	163.341	195.058	244.163	3.6199	NA
JG-CL39-49	155.653	36663.4	1.14151	19.3848	5.57603	0.283549	5.62309	0.0398647	0.726023	0.129114		251.994	1.79424	253.469	12.6137	267.151	127.997	251.994	1.79424	NA
JG-CL39-50	112.793	38803.6	1.869	13.4563	1.22062	1.82207	1.32148	0.177824	0.506354	0.383173		1055.07	4.92813	1053.43	8.66359	1050.05	24.6215	1050.05	24.6215	100.478
JG-CL39-51	99.7341	13296.6	1.43662	18.4206	10.1132	0.290471	10.3565	0.0388067	2.2314	0.21546		245.432	5.37363	258.93	23.6742	382.952	227.784	245.432	5.37363	NA
JG-CL39-52	79.5216	64274	1.34521	13.0334	1.26059	1.97377	1.91361	0.186574	1.43974	0.752366		1102.79	14.5935	1106.59	12.8972	1114.06	25.185	1114.06	25.185	98.9881
JG-CL39-53	252.626	33074.9	1.58469	19.752	4.83436	0.235895	5.3027	0.033793	2.17889	0.410902		214.244	4.59141	215.053	10.2773	223.946	111.839	214.244	4.59141	NA
JG-CL39-54	163.443	76639	1.65959	16.8917	2.06292	0.675808	3.79433	0.0827933	3.18453	0.839288		512.774	15.6969	524.237	15.5381	574.482	44.8391	512.774	15.6969	89.2585
JG-CL39-55	278.85	23221.8	2.9509	20.1094	4.96574	0.261413	5.89616	0.0381264	3.17902	0.539168		241.209	7.5264	235.805	12.4077	182.275	115.742	241.209	7.5264	NA
JG-CL39-56	242.899	35613.5	1.63317	20.9531	4.73584	0.202473	4.86609	0.0307691	1.11835	0.229825		195.36	2.15204	187.217	8.31979	85.7117	112.373	195.36	2.15204	NA
JG-CL39-57	323.864	47174.3	3.99885	19.5514	3.31116	0.282888	3.4156	0.0401136	0.838146	0.245388		253.537	2.08377	252.946	7.6477	247.474	76.2628	253.537	2.08377	NA
JG-CL39-58	438.961	8039.99	0.794621	20.1635	4.65721	0.122352	5.63849	0.0178927	3.17853	0.563719		114.324	3.60178	117.202	6.24136	176.01	108.694	114.324	3.60178	NA
JG-CL39-59	112.372	10959	0.753273	21.5561	8.77644	0.253264	9.00763	0.0395952	2.0277	0.225109		250.323	4.97852	229.224	18.485	17.945	211.171	250.323	4.97852	NA
JG-CL39-60	33.6937	3633.31	0.97071	18.9939	29.5041	0.276752	29.8197	0.0381245	4.32668	0.145095		241.197	10.243	248.078	65.7239	313.662	684.62	241.197	10.243	NA
JG-CL39-61	209.2	74824.6	1.61024	14.0155	0.754171	1.43705	1.17074	0.146076	0.895469	0.764872		878.931	7.35758	904.492	7.00981	967.429	15.4088	967.429	15.4088	90.8522
JG-CL39-62	212.2	28601.6	1.40099	18.6645	3.27299	0.379642	4.16821	0.0513913	2.58098	0.619206		323.058	8.13258	326.775	11.6468	353.318	73.9355	323.058	8.13258	NA
JG-CL39-63	289.209	51523.7	0.677989	19.6015	2.26818	0.258082	2.47503	0.0366897	0.990538	0.400212		232.282	2.25988	233.12	5.15541	241.573	52.2822	232.282	2.25988	NA
JG-CL39-64	301.377	51012.1	3.86721	19.5498	3.25384	0.290143	3.41109	0.041139	1.02377	0.300129		259.889	2.60774	258.672	7.78945	247.645	74.9285	259.889	2.60774	NA
JG-CL39-65	137.022	15051.7	0.965691	20.4084	5.20934	0.290163	6.95567	0.0429486	4.60915	0.662645		271.084	12.2356	258.688	15.8855	147.788	122.187	271.084	12.2356	NA
JG-CL39-66	158.38	50058.4	2.13768	17.247	2.37845	0.690412	2.53394	0.0863616	0.873956	0.344901		533.983	4.47872	533.048	10.5089	529.068	52.1229	533.983	4.47872	100.929
JG-CL39-67	162.511	15106.2	1.38513	20.2531	3.63993	0.289267	3.79613	0.0424903	1.07774	0.283904		268.25	2.83171	257.983	8.64845	165.661	85.1084	268.25	2.83171	NA
JG-CL39-68	428.78	64593.6	2.35892	19.3381	1.79979	0.3487	2.37182	0.0489063	1.54475	0.651295		307.803	4.64307	303.743	6.22664	272.65	41.2737	307.803	4.64307	NA
JG-CL39-69	53.7375	10269.3	0.751278	18.1295	13.1327	0.322174	13.3895	0.0423618	2.60972	0.194909		267.456	6.83704	283.573	33.1397	418.643	294.412	267.456	6.83704	NA
JG-CL39-70	197.531	30050.3	1.14247	18.2841	2.00624	0.420907	2.43126	0.0558159	1.37333	0.564863		350.129	4.68019	356.7	7.31291	399.651	44.9502	350.129	4.68019	NA
JG-CL39-71	278.354	41677.3	0.939286	18.3438	1.63952	0.399355	2.04041	0.0531308	1.2146	0.595271		333.714	3.95015	341.18	5.91266	392.343	36.7738	333.714	3.95015	NA
JG-CL39-72	272.49	41139.4	1.76492	19.8917	3.51407	0.276527	3.58032	0.0398941	0.685562	0.191481		252.176	1.69545	247.899	7.87531	207.601	81.5085	252.176	1.69545	NA
JG-CL39-73	265.189	60134.1	3.50261	17.8467	1.56874	0.587874	1.68472	0.0760922	0.61427	0.364613		472.755	2.80006	469.509	6.33331	453.652	34.8288	472.755	2.80006	104.211
JG-CL39-74	151.923	21122.2	1.54008	19.0566	5.3783	0.277824	6.97585	0.0383984	4.44257	0.63685		242.898	10.5902	248.93	15.4014	306.17	122.602	242.898	10.5902	NA
JG-CL39-75	877.913	69291.5	1.23512	19.2961	0.796758	0.285409	1.59045	0.0399425	1.37648	0.865468		252.477	3.40812	254.939	3.58573	277.675	18.2497	252.477	3.40812	NA
JG-CL39-76	205.833	178343	10.2865	15.1864	1.50775	1.19442	2.36458	0.131556	1.82152	0.770337		796.735	13.6517	798.006	13.0691	801.537	31.6039	796.735	13.6517	99.401
JG-CL39-77	242.622	23775	1.6083	21.1754	4.38982	0.133796	4.71808	0.0205482	1.72908	0.36648		131.119	2.24426	127.503	5.65338	60.5799	104.629	131.119	2.24426	NA
JG-CL39-78	48.0962	6062.96	0.983068	16.5573	7.53299	0.685993	8.14736	0.0823776	3.1038	0.380958		510.299	15.228	530.39	33.6721	617.778	162.821	510.299	15.228	82.6023
JG-CL39-79	342.765	89534.2	1.45114	17.8883	1.67897	0.566649	1.8876	0.0735162	0.862624	0.456995		457.305	3.80815	455.845	6.9325	448.472	37.3152	457.305	3.80815	101.97
JG-CL39-80	51.0285	9389.94	1.3715	25.9843	22.5856	0.210987	22.7915	0.0397617	3.05724	0.134139		251.356	7.53667	194.38	40.3411	-451.678	601.512	251.356	7.53667	NA
JG-CL39-81	57.0508	8299.49	1.17243	23.1538	14.1593	0.277111	14.4732	0.0465345	2.99772	0.207122		293.21	8.59272	248.364	31.8979	-156.653	353.229	293.21	8.59272	NA
JG-CL39-82	201.756	39515.5	1.3549	20.4841	2.01303	0.28847	2.25949	0.0428565	1.02617	0.454161		270.515	2.71851	257.354	5.13654	139.113	47.2739	270.515	2.71851	NA
JG-CL39-83	203.465	31784.2	1.30361	19.5811	3.85129	0.316898	4.27992	0.0450045	1.8669	0.436201		283.779	5.18296	279.513	10.458	243.96	88.7537	283.779	5.18296	NA
JG-CL39-84	57.8163	9566.36	1.11479	19.2101	17.3655	0.274382	17.6153	0.0382282	2.95619	0.16782		241.841	7.01686	246.191	38.5287	287.865	399.537	241.841	7.01686	NA
JG-CL39-85	103.331	8167.54	0.689912	18.7991	7.15645	0.358823	7.73299	0.0489234	2.92992	0.378885		307.908	8.8094	311.335	20.7374	337.091	162.329	307.908	8.8094	NA
JG-CL39-86	245.993	88194.6	0.742729	16.4327	1.33571	0.84872	1.38489	0.101151	0.365776	0.26412		621.152	2.16599	623.946	6.4557	634.113	28.7561	621.152	2.16599	97.956
JG-CL39-87	332.827	59229.5	11.3327	19.4568	2.91257	0.283907	3.1334	0.0400633	1.15546	0.368757		253.225	2.8692	253.752	7.0355	258.631	66.9327	253.225	2.8692	NA
JG-CL39-88	195.596	48869.1	1.24832	19.3283	5.58503	0.324775	5.70278	0.0455276	1.15289	0.202163		287.005	3.23628	285.569	14.1966	273.812	128.046	287.005	3.23628	NA
JG-CL39-89	68.5121	82226.1	0.743676	9.91669	0.849856	4.14766	1.79109	0.298311	1.57662	0.88026		1682.93	23.3527	1663.75	14.6545	1639.61	15.7782	1639.61	15.7782	102.642
JG-CL39-90	272.048	34368.1	0.701473	19.4998	3.19804	0.253875	3.48289	0.0359045	1.37951	0.396083		227.397	3.08229	229.719	7.16047	253.552	73.5789	227.397	3.08229	NA
JG-CL39-91	485.046	63926.8	2.09064	19.1347	1.88799	0.315317	2.03196	0.0437589	0.751244	0.369713		276.09	2.03032	278.294	4.94613	296.871	43.0871	276.09	2.03032	NA
JG-CL39-92	241.516	65908.2	1.04915	17.26	1.33571	0.684099	1.6387	0.0856364	0.949336	0.579321		529.679	4.82739	529.249	6.75909	527.417	29.2866	529.679	4.82739	100.429
JG-CL39-93	390.411	79452.9	5.81619	17.1568	1.03105	0.692474	2.25368	0.0861667	2.004	0.889212		532.826	10.2485	534.286	9.36301	540.524	22.5492	532.826	10.2485	98.5758
JG-CL39-94	178.823	40247.4	0.678032	19.6818	3.78134	0.315692	3.9466	0.0450638	1.13009	0.286346		284.145	3.14135	278.584	9.61558	232.123	87.3266	284.145	3.14135	NA
JG-CL39-95	203.492	26423.2	0.658849	18.7953	3.36466	0.346206	5.29318	0.0471935	4.08617	0.771969		297.268	11.8711	301.863	13.8228	337.563	76.2244	297.268	11.8711	NA
JG-CL39-96	138.176	20150.7	1.02147	17.3203	2.4344	0.63925	2.57738	0.0803018	0.846539	0.328449		497.924	4.05644	501.842	10.2059	519.724	53.4552	497.924	4.05644	95.8054
JG-CL39-97	244.613	60148.9	1.98438	18.9491	2.3955	0.343567	2.50784	0.047217	0.742176	0.295943		297.413	2.15718	299.871	6.51159	319.026	54.4544	297.413	2.15718	NA
JG-CL39-98	108.135	55102.8	2.42744	13.217	1.47617	1.99278	1.73257	0.191024	0.907047	0.523526		1126.92	9.37813	1113.06	11.7145	1086.08	29.5939	1086.08	29.5939	103.761
JG-CL39-99	376.911	47983.8	4.63785	18.8507	0.957868	0.388101	1.33774	0.0530604	0.933834	0.698067		333.283	3.03323	332.981	3.79777	330.892	21.7232	333.283	3.03323	NA
JG-CL39-100	119.094	12802.6	1.47448	20.924	9.79549	0.243432	9.85397	0.036942	1.07192	0.10878		233.85	2.46176	221.227	19.5907	89.0119	232.649	233.85	2.46176	NA
JG-CL39-101	446.701	45503.8	2.73875	19.692	2.3272	0.256989	2.79736	0.036703	1.55221	0.554884		232.364	3.54254	232.237	5.80718	230.931	53.7533	232.364	3.54254	NA
JG-CL39-102	182.038	59467.9	1.45463	16.8487	2.80913	0.732932	2.85694	0.0895633	0.520472	0.182178		552.954	2.75799	558.273	12.2697	579.997	61.0559	552.954	2.75799	95.3374
JG-CL39-103	101.06	9627.9	0.970876	19.2443	8.20907	0.282228	8.73352	0.0393912	2.98086	0.341312		249.058	7.28249	252.423	19.5212	283.828	188.024	249.058	7.28249	NA
JG-CL39-104	191.247	26352.4	0.689544	20.1028	6.00454	0.234912	6.31021	0.03425	1.94016	0.307464		217.093	4.14182	214.246	12.1889	183.041	139.975	217.093	4.14182	NA
JG-CL39-105	170.941	24213.9	1.12947	20.0156	7.86959	0.273247	8.15492	0.0396665	2.13828	0.262207		250.765	5.25911	245.287	17.772	193.2	183.219	250.765	5.25911	NA
JG-CL39-106	136.982	31116	6.58398	18.9954	3.93777	0.432675	4.02537	0.0596087	0.835245	0.207495		373.245	3.02898	365.074	12.3445	313.487	89.6069	373.245	3.02898	NA
JG-CL39-107	63.6045	27003.7	1.38471	16.9016	4.4282	0.720155	4.66866	0.0882778	1.47898	0.31679		545.344	7.73382	550.759	19.8489	573.235	96.3504	545.344	7.73382	95.1344
JG-CL39-108	122.66	13376.7	0.842919	20.8327	5.97655	0.236078	6.30651	0.0356697	2.0132	0.319225		225.936	4.46974	215.204	12.2307	99.3397	141.499	225.936	4.46974	NA
JG-CL39-109	198.671	1371.66	0.893439	17.4096	7.91298	0.303317	8.20871	0.0382988	2.18348	0.265995		242.28	5.19194	268.988	19.4001	508.466	174.265	242.28	5.19194	NA
JG-CL39-110	294.608	26238.6	1.62604	19.5299	3.75996	0.273733	3.84472	0.0387726	0.802877	0.208826		245.221	1.93184	245.674	8.38984	249.984	86.5565	245.221	1.93184	NA
JG-CL39-111	198.622	37929.4	0.918987	19.2068	3.51631	0.376208	3.59207	0.0524061	0.733856	0.204299		329.277	2.35574	324.244	9.97084	288.278	80.3746	329.277	2.35574	NA
JG-CL39-112	643.707	146307	1.98962	18.7343	0.746822	0.399283	1.59263	0.0542523	1.40668	0.883239		340.575	4.66644	341.128	4.61449	344.909	16.8895	340.575	4.66644	NA
JG-CL39-113	111.547	34506.6	0.772886	16.7424	2.23792	0.679651	2.37271	0.0825283	0.788314	0.332242		511.196	3.87419	526.563	9.74887	593.775	48.5146	511.196	3.87419	86.0926
JG-CL39-114	445.483	67938.9	0.719573	18.9818	1.8384	0.396652	3.0536	0.0546066	2.43819	0.798464		342.742	8.13842	339.217	8.80591	315.153	41.8173	342.742	8.13842	NA
JG-CL39-115	108.671	21341.3	1.05325	19.7777	6.43414	0.278976	6.59319	0.0400167	1.43946	0.218326		252.936	3.57042	249.845	14.6036	220.905	148.97	252.936	3.57042	NA
JG-CL39-116	59.4716	13546.1	0.844238	19.1443	11.2235	0.404785	11.328	0.0562036	1.53524	0.135525		352.496	5.26636	345.113	33.1554	295.688	256.88	352.496	5.26636	NA
JG-WB50
JG-WB50-1	316.107	4300.81	1.3924	21.8873	1.92015	0.096332	3.41955	0.0152985	2.82954	0.827461		97.8739	2.74847	93.3849	3.0509	NA	NA	97.8739	2.74847	NA
JG-WB50-2	2009.58	25160	6.65316	19.6181	1.10021	0.216364	3.53853	0.0307984	3.36314	0.950435		195.543	6.47765	198.879	6.39115	239.627	25.3525	195.543	6.47765	NA
JG-WB50-3	1287.54	10818.8	0.629488	20.0154	0.781142	0.224041	2.49487	0.0325372	2.36943	0.949721		206.408	4.81324	205.268	4.63675	193.222	18.1691	206.408	4.81324	NA
JG-WB50-4	612.264	8458.29	1.18926	20.0868	0.84494	0.227732	2.4739	0.0331912	2.32514	0.939867		210.49	4.81514	208.325	4.65947	184.9	19.6985	210.49	4.81514	NA
JG-WB50-5	414.294	19121.1	2.40087	19.4446	1.32228	0.235308	2.56329	0.0331988	2.19591	0.856677		210.538	4.54853	214.571	4.95783	260.092	30.3747	210.538	4.54853	NA
JG-WB50-6	151.084	5354	1.70625	19.8215	1.22122	0.232013	2.31629	0.0333684	1.96821	0.849723		211.595	4.09703	211.859	4.42917	215.78	28.2844	211.595	4.09703	NA
JG-WB50-7	439.922	22699.8	0.761052	19.5985	1.22454	0.240444	2.4697	0.034192	2.14474	0.868423		216.732	4.57106	218.784	4.86087	241.934	28.1993	216.732	4.57106	NA
JG-WB50-8	435.261	7341.61	1.39238	19.8069	1.56973	0.244593	2.6108	0.0351517	2.0862	0.799065		222.711	4.56684	222.174	5.20982	217.484	36.3603	222.711	4.56684	NA
JG-WB50-9	534.968	11251.5	1.55049	19.6409	1.28268	0.248209	4.47763	0.0353726	4.28998	0.958091		224.086	9.44808	225.121	9.04108	236.947	29.6003	224.086	9.44808	NA
JG-WB50-10	364.027	41020.3	0.999505	18.8848	1.50529	0.258915	2.97549	0.0354778	2.56664	0.862594		224.741	5.66892	233.792	6.21377	326.793	34.1598	224.741	5.66892	NA
JG-WB50-11	418.374	33428.7	1.37663	19.6713	1.06509	0.249206	3.62485	0.0355696	3.46484	0.955858		225.312	7.67186	225.931	7.34262	233.4	24.5975	225.312	7.67186	NA
JG-WB50-12	114.655	4367.92	1.55181	20.2396	1.45772	0.242259	2.79529	0.035577	2.38509	0.853255		225.359	5.28215	220.269	5.53514	167.226	34.0591	225.359	5.28215	NA
JG-WB50-13	371.537	38323.9	1.73976	19.1787	1.52574	0.256221	2.98633	0.0356551	2.56716	0.859635		225.845	5.69741	231.617	6.18475	291.624	34.8689	225.845	5.69741	NA
JG-WB50-14	229.08	11446.8	1.15586	19.1834	1.36977	0.256757	2.62487	0.0357384	2.23913	0.853042		226.363	4.98061	232.05	5.4452	291.029	31.3123	226.363	4.98061	NA
JG-WB50-15	118.005	2075.05	1.68557	22.5372	6.55503	0.220186	6.83598	0.0360063	1.93964	0.28374		228.03	4.34566	202.065	12.5261	NA	NA	228.03	4.34566	NA
JG-WB50-16	301.469	13895.8	1.89864	19.4237	1.11963	0.255815	2.17805	0.0360532	1.86824	0.857759		228.323	4.19097	231.289	4.50506	262.539	25.6972	228.323	4.19097	NA
JG-WB50-17	581.391	8896.73	1.20336	19.3427	1.27631	0.257617	3.58253	0.0361559	3.34747	0.934387		228.962	7.52992	232.745	7.45169	272.104	29.268	228.962	7.52992	NA
JG-WB50-18	465.879	5101.95	0.816268	20.8116	3.15973	0.239574	3.86341	0.0361771	2.22306	0.575415		229.093	5.00345	218.072	7.58186	101.755	74.7121	229.093	5.00345	NA
JG-WB50-19	740.188	36166.3	1.47105	19.5599	0.993223	0.255252	2.4518	0.0362263	2.24161	0.914272		229.399	5.05182	230.834	5.0624	246.452	22.8489	229.399	5.05182	NA
JG-WB50-20	424.545	22487.7	1.27046	19.5129	1.04041	0.255941	2.49984	0.0362367	2.27304	0.909277		229.464	5.12408	231.39	5.17268	252.03	23.9126	229.464	5.12408	NA
JG-WB50-21	243.902	2871.31	1.87523	21.6593	3.29354	0.231316	4.07483	0.0363527	2.39934	0.58882		230.186	5.42549	211.284	7.77291	6.48817	79.3082	230.186	5.42549	NA
JG-WB50-22	148.63	3351.69	1.34077	21.5187	1.86968	0.234742	3.06476	0.0366517	2.42838	0.792356		232.045	5.53473	214.106	5.91624	22.1396	44.8588	232.045	5.53473	NA
JG-WB50-23	182.08	2753.15	1.54977	20.8714	1.5076	0.242262	3.10405	0.036688	2.71335	0.874133		232.271	6.19014	220.271	6.14662	94.9745	35.6905	232.271	6.19014	NA
JG-WB50-24	565.074	10660.5	3.38595	19.663	1.26371	0.257342	2.18592	0.0367153	1.78362	0.815957		232.441	4.072	232.523	4.5428	234.379	29.1702	232.441	4.072	NA
JG-WB50-25	335.53	9408.38	1.08548	19.1839	1.03877	0.264437	2.18189	0.0368084	1.91875	0.879397		233.019	4.39121	238.236	4.63331	290.965	23.7234	233.019	4.39121	NA
JG-WB50-26	345.963	27092.6	1.23105	19.4408	0.988384	0.262508	2.19864	0.0370292	1.96396	0.893259		234.392	4.52067	236.686	4.64191	260.544	22.7145	234.392	4.52067	NA
JG-WB50-27	282.678	5295.48	1.30132	19.7909	1.3138	0.258429	2.1571	0.0371103	1.71085	0.793124		234.896	3.94638	233.4	4.49796	219.361	30.4112	234.896	3.94638	NA
JG-WB50-28	131.504	2370.41	0.833531	22.1038	2.5033	0.232911	3.58325	0.0373547	2.56381	0.7155		236.415	5.95145	212.599	6.87341	NA	NA	236.415	5.95145	NA
JG-WB50-29	233.544	4175.02	1.29614	20.592	1.33854	0.250477	2.47314	0.0374243	2.07959	0.840872		236.848	4.83609	226.964	5.03007	126.787	31.4972	236.848	4.83609	NA
JG-WB50-30	217.173	59535.9	1.21454	18.816	1.34014	0.274325	2.51533	0.0374525	2.1286	0.846248		237.023	4.95364	246.146	5.49813	335.039	30.3528	237.023	4.95364	NA
JG-WB50-31	963.367	105399	3.21531	19.0689	1.16542	0.272262	2.97595	0.0376704	2.73826	0.92013		238.377	6.40816	244.5	6.46652	304.725	26.5469	238.377	6.40816	NA
JG-WB50-32	104.673	1495.34	1.17984	22.7875	6.74751	0.227902	7.22467	0.0376819	2.58204	0.357392		238.448	6.04435	208.465	13.6163	NA	NA	238.448	6.04435	NA
JG-WB50-33	200.249	22953.2	1.7702	19.1305	1.24226	0.272039	2.79753	0.0377612	2.50659	0.896		238.941	5.87963	244.323	6.07493	297.343	28.3501	238.941	5.87963	NA
JG-WB50-34	383.152	31603.9	1.97141	19.0153	1.09612	0.273693	2.80887	0.0377619	2.58618	0.920716		238.945	6.06643	245.642	6.12867	311.121	24.97	238.945	6.06643	NA
JG-WB50-35	186.639	5647.68	1.8591	20.4014	1.95489	0.255308	2.66242	0.0377931	1.80744	0.678873		239.139	4.24311	230.879	5.49825	148.628	45.8365	239.139	4.24311	NA
JG-WB50-36	695.009	48523.2	1.15581	18.9554	1.14635	0.27497	2.76786	0.0378186	2.51931	0.910202		239.297	5.91812	246.659	6.06128	318.274	26.0422	239.297	5.91812	NA
JG-WB50-37	208.928	5093.07	1.68487	20.1437	2.24714	0.25909	2.98427	0.0378684	1.96374	0.658028		239.607	4.61887	233.933	6.23545	178.304	52.3749	239.607	4.61887	NA
JG-WB50-38	122.816	4855.24	2.15846	19.984	1.63794	0.261456	2.8072	0.0379113	2.27981	0.812129		239.873	5.36816	235.839	5.90791	196.849	38.0605	239.873	5.36816	NA
JG-WB50-39	74.5171	3554.2	1.74006	10.233	5.99475	0.510861	6.78549	0.0379309	3.17899	0.468498		239.995	7.48915	419.028	23.3005	1581.1	112.236	239.995	7.48915	NA
JG-WB50-40	369.954	8126.83	1.42449	20.05	1.1705	0.261905	3.13302	0.0381019	2.90616	0.92759		241.057	6.87614	236.201	6.60263	189.16	27.2371	241.057	6.87614	NA
JG-WB50-41	161.408	4848.34	1.86883	20.6546	1.50571	0.254652	2.90539	0.0381639	2.48477	0.85523		241.442	5.88833	230.348	5.98774	119.61	35.5121	241.442	5.88833	NA
JG-WB50-42	249.806	198486	2.73208	19.0514	1.4193	0.276328	2.89638	0.0381978	2.5248	0.871708		241.653	5.9883	247.74	6.36728	306.783	32.353	241.653	5.9883	NA
JG-WB50-43	626.149	83582.1	1.10776	18.68	1.09415	0.282189	2.85032	0.0382477	2.63195	0.923388		241.962	6.25028	252.392	6.36967	351.466	24.7048	241.962	6.25028	NA
JG-WB50-44	137.09	1452.88	1.31935	24.5356	4.51504	0.216122	5.17088	0.0384755	2.52039	0.48742		243.377	6.0197	198.677	9.33101	NA	NA	243.377	6.0197	NA
JG-WB50-45	420.471	11911.6	1.60267	19.8682	1.3151	0.266991	4.36062	0.0384895	4.15759	0.953439		243.463	9.93343	240.285	9.33068	210.334	30.5051	243.463	9.93343	NA
JG-WB50-46	729.68	13777.7	2.31842	19.9781	1.19437	0.265752	2.58942	0.0385228	2.29752	0.88727		243.67	5.49388	239.292	5.52033	197.566	27.75	243.67	5.49388	NA
JG-WB50-47	436.879	43796.3	1.97824	19.2776	1.00106	0.275818	3.30983	0.0385801	3.15481	0.953165		244.026	7.55466	247.334	7.26568	279.864	22.9016	244.026	7.55466	NA
JG-WB50-48	267.682	15744.2	1.73372	19.3818	1.45772	0.275749	2.62711	0.0387788	2.18557	0.831932		245.259	5.25963	247.279	5.76581	267.473	33.4412	245.259	5.25963	NA
JG-WB50-49	147.81	1719.28	1.02711	22.0274	1.82334	0.242904	2.92798	0.0388227	2.29097	0.782439		245.531	5.51927	220.796	5.81032	NA	NA	245.531	5.51927	NA
JG-WB50-50	640.486	23831.8	1.45558	19.403	0.958853	0.276132	2.23363	0.0388753	2.01735	0.903171		245.858	4.86642	247.584	4.90755	264.956	22.0068	245.858	4.86642	NA
JG-WB50-51	60.102	7686.49	2.08723	19.1136	2.19986	0.282544	3.28593	0.0391846	2.44089	0.742832		247.776	5.9332	252.673	7.35036	299.349	50.1729	247.776	5.9332	NA
JG-WB50-52	143.674	2487.7	1.67939	21.8234	3.5936	0.248073	4.27232	0.0392817	2.31057	0.540823		248.379	5.62981	225.01	8.62271	NA	NA	248.379	5.62981	NA
JG-WB50-53	151.88	4752.01	2.32451	18.9911	2.25333	0.287651	3.18468	0.0396372	2.25049	0.706661		250.584	5.53116	256.708	7.22387	313.992	51.2575	250.584	5.53116	NA
JG-WB50-54	147.571	32942.3	1.93424	19.7044	1.66775	0.279685	2.98552	0.0399871	2.47627	0.829429		252.753	6.13775	250.408	6.62555	229.474	38.5021	252.753	6.13775	NA
JG-WB50-55	149.755	7866.69	2.81086	19.5281	1.87915	0.283122	3.48662	0.0401164	2.93689	0.842332		253.554	7.30207	253.131	7.81175	250.19	43.2463	253.554	7.30207	NA
JG-WB50-56	279.624	3937.36	1.7114	19.927	3.97986	0.277691	4.67307	0.0401505	2.44914	0.524096		253.766	6.09434	248.824	10.3129	203.469	92.3824	253.766	6.09434	NA
JG-WB50-57	193.033	28370.6	1.12258	19.3766	1.26514	0.287989	2.59467	0.0404894	2.26534	0.873072		255.866	5.68271	256.975	5.8909	268.085	29.002	255.866	5.68271	NA
JG-WB50-58	142.667	21372.8	1.24973	16.3731	1.26784	0.342067	2.41168	0.0406378	2.05153	0.850664		256.785	5.16447	298.737	6.24154	641.925	27.2722	256.785	5.16447	NA
JG-WB50-59	626.091	62109.8	1.4294	19.3161	0.902057	0.295722	2.35777	0.0414468	2.17838	0.923918		261.795	5.58864	263.053	5.46394	275.252	20.6743	261.795	5.58864	NA
JG-WB50-60	384.448	24842.6	2.54585	18.8925	1.09206	0.303568	2.83558	0.0416133	2.61685	0.922863		262.825	6.73943	269.183	6.70502	325.856	24.7787	262.825	6.73943	NA
JG-WB50-61	118.084	36851	1.03307	18.904	1.96782	0.304267	3.9482	0.0417345	3.42286	0.866941		263.575	8.83985	269.727	9.35253	324.463	44.665	263.575	8.83985	NA
JG-WB50-62	175.486	4240.37	1.17581	20.1611	3.43539	0.286332	4.32407	0.0418864	2.62596	0.607289		264.515	6.80548	255.668	9.77356	176.287	80.157	264.515	6.80548	NA
JG-WB50-63	220.575	17736.5	1.75348	18.9223	1.22065	0.307094	2.67734	0.0421632	2.38289	0.890021		266.228	6.21469	271.926	6.3871	322.282	27.7448	266.228	6.21469	NA
JG-WB50-64	137.544	4718.96	1.70723	20.2148	3.59831	0.289	4.13863	0.0423893	2.04461	0.49403		267.626	5.35986	257.772	9.42201	170.079	84.0266	267.626	5.35986	NA
JG-WB50-65	692.7	34038.1	2.72328	19.128	1.19614	0.305824	3.05575	0.0424452	2.81191	0.920204		267.972	7.38066	270.939	7.26678	297.669	27.302	267.972	7.38066	NA
JG-WB50-66	203.409	8153.91	1.8625	19.1136	2.19736	0.311179	3.43485	0.043156	2.64004	0.768604		272.366	7.04077	275.095	8.27743	299.342	50.1316	272.366	7.04077	NA
JG-WB50-67	79.7018	1794.37	1.68452	21.2677	2.08078	0.28966	3.25825	0.044699	2.5073	0.769522		281.894	6.9156	258.292	7.4308	50.2147	49.6847	281.894	6.9156	NA
JG-WB50-68	230.967	5407.96	0.691742	19.821	1.49595	0.314821	2.75256	0.0452771	2.31057	0.839425		285.46	6.45184	277.911	6.69222	215.855	34.6406	285.46	6.45184	NA
JG-WB50-69	226.426	4240.15	1.38077	20.3388	3.64792	0.309082	4.48238	0.0456128	2.60469	0.581096		287.53	7.32471	273.469	10.7464	155.799	85.4279	287.53	7.32471	NA
JG-WB50-70	702.313	7157.77	2.88415	17.4918	1.46815	0.360008	3.2302	0.0456914	2.87728	0.890742		288.015	8.10459	312.221	8.68241	498.058	32.354	288.015	8.10459	NA
JG-WB50-71	379.058	19477.4	7.90225	19.1926	1.07961	0.335791	2.53041	0.0467618	2.28854	0.904415		294.61	6.59053	293.977	6.45888	289.956	24.6574	294.61	6.59053	NA
JG-WB50-72	322.043	57730	1.58498	18.8431	1.15302	0.343559	2.43296	0.0469723	2.14239	0.880569		295.906	6.19616	299.865	6.31706	331.795	26.137	295.906	6.19616	NA
JG-WB50-73	627.192	50129.7	1.58575	18.5441	1.18012	0.349815	3.3737	0.0470687	3.16057	0.936824		296.5	9.15884	304.582	8.87794	367.919	26.5786	296.5	9.15884	NA
JG-WB50-74	308.17	161400	2.10717	18.2948	1.24676	0.364356	3.06717	0.0483661	2.80234	0.913657		304.483	8.33427	315.462	8.31717	398.334	27.9443	304.483	8.33427	NA
JG-WB50-75	536.299	9948.43	54.191	18.8801	1.06572	0.355836	2.23743	0.0487464	1.96731	0.879274		306.821	5.89472	309.101	5.96247	327.331	24.1945	306.821	5.89472	NA
JG-WB50-76	1184.39	1.16299e+06	2.94953	18.5614	0.824934	0.367421	2.15166	0.0494838	1.98724	0.923585		311.352	6.04026	317.74	5.87043	365.812	18.5875	311.352	6.04026	NA
JG-WB50-77	316.985	7816.35	4.62815	19.0634	2.20131	0.365606	3.39215	0.0505711	2.58087	0.760837		318.027	8.00871	316.392	9.22158	305.359	50.1595	318.027	8.00871	NA
JG-WB50-78	1009.99	23397.3	1.74399	18.8386	0.96142	0.378744	2.25734	0.0517703	2.04237	0.904767		325.381	6.48056	326.114	6.29644	332.34	21.7958	325.381	6.48056	NA
JG-WB50-79	602.915	32253.5	1.37059	18.5376	1.03391	0.391353	2.7176	0.0526393	2.51324	0.924802		330.705	8.10183	335.357	7.76166	368.705	23.2791	330.705	8.10183	NA
JG-WB50-80	453.065	15287.9	8.71244	18.7574	1.11826	0.390699	2.58609	0.0531745	2.33181	0.901676		333.982	7.58953	334.88	7.37717	342.094	25.3135	333.982	7.58953	NA
JG-WB50-81	229.968	5997.79	1.28232	19.1311	2.6891	0.391201	4.33508	0.0543036	3.40024	0.784355		340.889	11.2899	335.246	12.3782	297.285	61.3565	340.889	11.2899	NA
JG-WB50-82	422.06	212815	11.7395	18.4176	1.07323	0.409872	5.5188	0.0547734	5.41343	0.980909		343.761	18.1218	348.783	16.2922	383.323	24.1177	343.761	18.1218	NA
JG-WB50-83	424.838	14360.4	1.97078	18.6527	1.15486	0.415738	2.48033	0.0562664	2.19507	0.884991		352.88	7.53777	352.999	7.39579	354.79	26.0804	352.88	7.53777	NA
JG-WB50-84	319.91	85893.3	14.9441	15.9611	1.01761	0.497052	2.85222	0.0575641	2.66452	0.934189		360.795	9.34936	409.705	9.61593	696.432	21.6835	360.795	9.34936	NA
JG-WB50-85	758.069	156470	2.26903	17.8867	0.980662	0.521774	2.87644	0.0677173	2.70411	0.940089		422.388	11.0557	426.335	10.0145	448.676	21.8084	422.388	11.0557	94.141
JG-WB50-86	671.312	31375.4	6.9019	17.6423	1.0044	0.545995	2.81117	0.0698929	2.62562	0.933994		435.51	11.0572	442.37	10.0812	479.153	22.2108	435.51	11.0572	90.8917
JG-WB50-87	719.658	24633.8	19.7369	17.7031	0.98025	0.552205	2.86316	0.0709312	2.69013	0.939567		441.763	11.486	446.44	10.3429	471.553	21.7134	441.763	11.486	93.6827
JG-WB50-88	276.613	11665.8	2.35269	17.7251	1.24914	0.562977	2.6714	0.0724048	2.36136	0.883941		450.628	10.2776	453.462	9.77059	468.823	27.678	450.628	10.2776	96.119
JG-WB50-89	402.924	22022.1	3.53577	17.733	0.820565	0.585424	2.26562	0.0753253	2.1118	0.932108		468.159	9.53613	467.941	8.49477	467.821	18.1804	468.159	9.53613	100.072
JG-WB50-90	64.7013	8176.55	2.74396	17.6016	1.70844	0.590272	2.66512	0.0753862	2.04551	0.767511		468.524	9.24374	471.041	10.0448	484.307	37.7259	468.524	9.24374	96.7412
JG-WB50-91	796.412	2.51514e+06	1.55614	17.2241	0.873817	0.625628	2.66508	0.0781882	2.51776	0.944721		485.299	11.7701	493.369	10.4148	531.976	19.1589	485.299	11.7701	91.2258
JG-WB50-92	102.636	37873.4	1.44987	16.7966	1.65617	0.64515	3.74518	0.0786269	3.35909	0.89691		487.921	15.7848	505.49	14.9138	586.748	35.9316	487.921	15.7848	83.1569
JG-WB50-93	682.079	31105.3	6.45272	17.4065	0.908484	0.642381	2.40174	0.0811319	2.22329	0.925699		502.875	10.7554	503.779	9.53868	508.825	19.981	502.875	10.7554	98.8308
JG-WB50-94	126.334	7433.21	2.50833	17.4182	1.3521	0.653125	2.9969	0.0825442	2.67455	0.89244		511.291	13.1465	510.4	12.023	507.346	29.7516	511.291	13.1465	100.778
JG-WB50-95	281.299	11141.2	0.981021	17.2754	0.892452	0.659723	2.14831	0.0826948	1.95417	0.90963		512.188	9.62174	514.445	8.67091	525.418	19.5735	512.188	9.62174	97.4819
JG-WB50-96	274.362	371629	1.91571	17.4006	1.07803	0.657423	2.73893	0.0830033	2.51785	0.919283		514.024	12.4398	513.036	11.0316	509.595	23.6932	514.024	12.4398	100.869
JG-WB50-97	232.454	270789	1.85261	17.084	1.09819	0.671388	3.1234	0.0832243	2.92397	0.936151		515.339	14.4818	521.556	12.7402	549.845	23.9938	515.339	14.4818	93.7245
JG-WB50-98	205.569	14686.7	5.31783	16.7069	1.28956	0.688164	3.94519	0.083421	3.72849	0.94507		516.51	18.5067	531.697	16.331	598.367	27.9141	516.51	18.5067	86.32
JG-WB50-99	343.882	25724.8	4.22469	17.2384	1.04847	0.673987	2.48461	0.0843014	2.25255	0.906602		521.746	11.2896	523.133	10.1578	530.168	22.9832	521.746	11.2896	98.4116
JG-WB50-100	263.961	20578.6	1.54315	17.2412	1.16662	0.684572	2.61725	0.0856397	2.34286	0.895161		529.698	11.9139	529.534	10.7999	529.801	25.5396	529.698	11.9139	99.9805
JG-WB50-101	572.544	32055.6	2.99398	17.2329	0.83956	0.690295	2.79229	0.0863141	2.66309	0.953728		533.701	13.6405	532.978	11.5793	530.855	18.3956	533.701	13.6405	100.536
JG-WB50-102	279.866	16075	3.60192	17.2177	1.09944	0.692742	2.60628	0.0865433	2.36303	0.906669		535.061	12.1332	534.446	10.8305	532.797	24.0733	535.061	12.1332	100.425
JG-WB50-103	71.5268	23910.5	2.19178	16.1621	1.46881	0.744182	3.15326	0.0872703	2.79028	0.884887		539.373	14.4376	564.843	13.6617	669.742	31.4364	539.373	14.4376	80.5344
JG-WB50-104	894.646	31297.4	2.05906	16.852	0.723572	0.718866	2.33321	0.0878996	2.21818	0.950698		543.103	11.5535	549.997	9.9084	579.587	15.7371	543.103	11.5535	93.7052
JG-WB50-105	354.389	17576.1	6.56963	16.7798	0.966788	0.724687	2.33611	0.0882316	2.12667	0.910347		545.07	11.1153	553.43	9.96731	588.92	20.9497	545.07	11.1153	92.5542
JG-WB50-106	461.644	36485	13.8817	16.8355	0.842228	0.7285	2.3295	0.0889902	2.17191	0.932353		549.563	11.4414	555.672	9.96933	581.747	18.2911	549.563	11.4414	94.4675
JG-WB50-107	624.909	49309.8	5.07412	16.7257	0.867991	0.734727	2.10739	0.0891658	1.92034	0.911238		550.602	10.1344	559.324	9.0632	595.899	18.7846	550.602	10.1344	92.3986
JG-WB50-108	515.576	42697.9	1.93009	16.9159	0.855014	0.730939	2.23605	0.0897148	2.06612	0.924006		553.85	10.9654	557.104	9.58789	571.378	18.5937	553.85	10.9654	96.9324
JG-WB50-109	185.614	42986.6	2.04116	16.9763	1.19429	0.745093	2.39224	0.0917784	2.07279	0.866466		566.046	11.2326	565.373	10.3715	563.593	26.0176	566.046	11.2326	100.435
JG-WB50-110	428.282	30723.3	2.02922	16.6936	0.826019	0.759807	2.27403	0.0920324	2.1187	0.931695		567.546	11.5105	573.899	9.9696	600.061	17.875	567.546	11.5105	94.5814
JG-WB50-111	89.9618	62236.1	1.4603	16.221	1.11434	0.870606	1.95652	0.102468	1.60817	0.821956		628.856	9.63547	635.896	9.24623	661.911	23.8799	628.856	9.63547	95.0061
JG-WB50-112	354.147	72473.5	7.80186	15.9901	1.12881	0.903154	2.97735	0.104785	2.75507	0.925342		642.391	16.8451	653.412	14.3475	692.565	24.0646	642.391	16.8451	92.7553
JG-WB50-113	967.388	49238.6	5.37494	15.9776	0.823366	0.909498	1.90104	0.105439	1.71349	0.90134		646.205	10.5358	656.791	9.19425	694.225	17.5304	646.205	10.5358	93.083
JG-WB50-114	717.276	15438.2	3.71849	15.3229	0.71451	0.97256	2.11644	0.108129	1.99219	0.94129		661.875	12.5315	689.782	10.5959	782.774	15.0125	661.875	12.5315	84.5551
JG-WB50-115	1951.03	1.22436e+07	6.4467	15.663	0.573299	0.974721	2.22041	0.110776	2.14513	0.966093		677.25	13.7908	690.894	11.129	736.506	12.1362	677.25	13.7908	91.9545
JG-WB50-116	315.437	29624.5	3.62197	14.9454	0.873171	1.09743	3.46258	0.119007	3.35068	0.967682		724.845	22.9717	752.108	18.3979	834.976	18.194	724.845	22.9717	86.8103
JG-WB50-117	562.974	120229	4.57322	14.4461	1.14921	1.14964	2.53224	0.120504	2.25644	0.891087		733.463	15.6434	777.074	13.7517	905.366	23.6897	733.463	15.6434	81.0129
JG-WB50-118	407.465	151350	2.81895	15.2715	0.953758	1.1026	2.61139	0.122176	2.43099	0.930917		743.074	17.0618	754.605	13.9056	789.83	20.0167	743.074	17.0618	94.0802
JG-WB50-119	399.842	40532.1	3.11644	15.5432	1.02005	1.09211	2.31051	0.123167	2.07316	0.897271		748.764	14.6555	749.527	12.2473	752.707	21.5166	748.764	14.6555	99.4762
JG-WB50-120	510.103	26348.6	6.18825	14.5701	1.04729	1.29571	2.68424	0.13698	2.47151	0.920746		827.565	19.1949	843.827	15.3842	887.744	21.6224	827.565	19.1949	93.221
JG-WB50-121	450.068	23727.9	2.32443	15.0218	0.978364	1.27093	2.53603	0.138525	2.33971	0.922588		836.317	18.3513	832.805	14.4122	824.334	20.4351	836.317	18.3513	101.454
JG-WB50-122	546.132	48914.7	1.879	14.2605	0.94698	1.46345	2.33177	0.151426	2.13082	0.913819		908.952	18.0646	915.431	14.0662	931.995	19.434	931.995	19.434	97.5275
JG-WB50-123	496.455	53068.7	21.6524	13.9722	0.730571	1.54536	2.01928	0.156669	1.88249	0.932257		938.239	16.4371	948.645	12.4489	973.761	14.8977	973.761	14.8977	96.352
JG-WB50-124	121.996	14894.5	1.77472	13.6181	1.06298	1.72738	2.70261	0.170683	2.48478	0.919403		1015.88	23.354	1018.78	17.3819	1025.88	21.5221	1025.88	21.5221	99.0252
JG-WB50-125	148.5	12613.2	2.12538	13.6157	0.88446	1.81189	2.60707	0.179002	2.45246	0.940695		1061.52	24.003	1049.76	17.0591	1026.23	17.8907	1026.23	17.8907	103.439
JG-WB50-126	724.701	55349.7	3.65224	13.5644	0.78389	1.63741	2.62279	0.161156	2.50291	0.954292		963.198	22.3934	984.717	16.5353	1033.86	15.8573	1033.86	15.8573	93.1652
JG-WB50-127	252.749	21110.8	3.0325	13.4782	0.907508	1.74403	2.2089	0.170558	2.01387	0.911707		1015.19	18.9161	1024.96	14.2561	1046.77	18.3193	1046.77	18.3193	96.9832
JG-WB50-128	831.847	6.65601e+06	2.51942	13.4767	0.878174	1.72357	2.24189	0.168538	2.06273	0.920088		1004.05	19.1787	1017.36	14.4066	1046.99	17.7264	1046.99	17.7264	95.8987
JG-WB50-129	193.544	54472.7	1.79793	13.4426	0.899685	1.67928	3.21361	0.163793	3.0851	0.960012		977.823	27.9905	1000.71	20.4544	1052.09	18.1465	1052.09	18.1465	92.9409
JG-WB50-130	190.738	107363	2.67079	13.2041	0.797041	1.79282	2.34937	0.171764	2.21004	0.940694		1021.83	20.884	1042.85	15.3147	1088.06	15.9542	1088.06	15.9542	93.9123
JG-WB50-131	250.532	57170	2.89953	13.201	1.01526	1.77856	2.76239	0.170358	2.56905	0.930012		1014.08	24.1067	1037.65	17.9559	1088.5	20.327	1088.5	20.327	93.163
JG-WB50-132	462.529	33861.8	1.75142	13.1524	0.842891	1.89282	2.17564	0.180635	2.00573	0.921903		1070.44	19.7823	1078.57	14.4556	1095.89	16.8577	1095.89	16.8577	97.6774
JG-WB50-133	684.718	54507.3	3.0954	13.1327	0.797555	1.90709	2.72592	0.181725	2.60664	0.95624		1076.39	25.8404	1083.57	18.1594	1098.9	15.958	1098.9	15.958	97.9516
JG-WB50-134	110.993	63757.2	1.09655	13.0838	1.00107	1.94964	2.27012	0.185087	2.03748	0.897519		1094.7	20.5134	1098.32	15.2369	1106.37	20.0084	1106.37	20.0084	98.9457
JG-WB50-135	255.473	37082.2	11.8772	12.9472	0.91387	1.78343	2.38027	0.167541	2.19784	0.92336		998.547	20.3313	1039.43	15.4869	1127.28	18.2271	1127.28	18.2271	88.5798
JG-WB50-136	778.876	580319	39.5542	12.8963	0.659495	1.90093	1.94585	0.177877	1.83069	0.940814		1055.36	17.8218	1081.42	12.9477	1135.14	13.1158	1135.14	13.1158	92.9722
JG-WB50-137	404.3	35542.7	2.70694	12.7069	0.797032	2.03591	2.19975	0.187709	2.05028	0.93205		1108.95	20.8885	1127.6	14.9798	1164.52	15.7934	1164.52	15.7934	95.2283
JG-WB50-138	258.701	82569.6	2.6302	12.6823	0.899978	2.02254	2.24664	0.186116	2.05851	0.916258		1100.3	20.8223	1123.11	15.2659	1168.35	17.8423	1168.35	17.8423	94.1755
JG-WB50-139	219.04	41055.9	1.13995	12.5015	1.08079	2.14746	2.30208	0.194794	2.03261	0.882942		1147.29	21.3627	1164.24	15.9497	1196.73	21.304	1196.73	21.304	95.8692
JG-WB50-140	253.502	34329.7	14.1106	12.4765	1.02424	2.17213	3.66283	0.196636	3.51671	0.960108		1157.23	37.253	1172.16	25.4725	1200.72	20.1858	1200.72	20.1858	96.3773
JG-WB50-141	941.924	141327	4.71774	12.0509	0.93261	2.24327	2.54544	0.196151	2.36844	0.930464		1154.61	25.0373	1194.68	17.8787	1268.78	18.1938	1268.78	18.1938	91.0014
JG-WB50-142	466.581	52440.5	2.564	9.93794	0.791697	3.81231	1.90867	0.274898	1.73673	0.909917		1565.62	24.1406	1595.35	15.3542	1635.64	14.7059	1635.64	14.7059	95.7192
JG-WB50-143	101.55	219010	0.976973	9.92128	0.656107	3.99472	2.39131	0.287569	2.29954	0.961624		1629.37	33.1082	1633.12	19.422	1638.75	12.1824	1638.75	12.1824	99.4273
JG-WB50-144	313.118	31508.4	0.819768	8.12442	0.914703	4.90868	2.81614	0.289364	2.66345	0.94578		1638.35	38.5333	1803.75	23.7595	2001.41	16.2462	2001.41	16.2462	81.8597
JG-WB50-145	121.958	63544.6	1.73693	3.30679	0.953643	27.3601	2.42611	0.656465	2.23083	0.919507		3253.41	56.9935	3396.44	23.7701	3482.59	14.7626	3482.59	14.7626	93.4194
JG-WR46
JG-WR46-1	303.042	2320.89	1.32957	22.4644	2.81186	0.11171	3.59052	0.0182085	2.23277	0.621851		116.324	2.57394	107.528	3.66344	NA	NA	116.324	2.57394	NA
JG-WR46-2	796.69	35197.7	0.851813	20.1779	1.28951	0.124507	2.69072	0.0182287	2.3616	0.877682		116.451	2.72543	119.149	3.02503	174.35	30.1106	116.451	2.72543	NA
JG-WR46-3	870.999	21374.7	0.960062	20.4052	1.45745	0.124181	3.17188	0.0183858	2.81721	0.888183		117.446	3.27874	118.855	3.55768	148.177	34.1578	117.446	3.27874	NA
JG-WR46-4	400.615	3051.41	1.88062	21.4194	3.10201	0.119388	4.26132	0.0185549	2.92171	0.685634		118.516	3.43106	114.517	4.61486	33.2241	74.3159	118.516	3.43106	NA
JG-WR46-5	710.496	5361.06	0.692837	20.5056	1.66845	0.125122	3.21258	0.0186163	2.74535	0.854562		118.905	3.23443	119.705	3.6276	136.633	39.179	118.905	3.23443	NA
JG-WR46-6	331.39	93855.9	1.39569	18.5727	1.77167	0.139076	3.17444	0.018742	2.63405	0.829769		119.7	3.12387	132.22	3.93548	364.439	39.9484	119.7	3.12387	NA
JG-WR46-7	156.145	1584.28	1.25247	23.5615	6.70307	0.11135	7.13365	0.0190361	2.44084	0.342159		121.561	2.93931	107.199	7.25749	NA	NA	121.561	2.93931	NA
JG-WR46-8	495.568	4885.58	1.57242	20.9534	3.49235	0.125422	4.4379	0.0190685	2.73833	0.617032		121.766	3.30306	119.976	5.02191	85.6762	82.8457	121.766	3.30306	NA
JG-WR46-9	333.145	10371	0.598412	20.1626	1.73692	0.130942	2.85742	0.0191564	2.26891	0.794042		122.322	2.74921	124.944	3.35927	176.118	40.5238	122.322	2.74921	NA
JG-WR46-10	224.462	1833.28	1.40901	24.3192	2.30384	0.108671	3.28705	0.0191756	2.34458	0.713277		122.443	2.84369	104.749	3.27151	NA	NA	122.443	2.84369	NA
JG-WR46-11	304.953	6839.61	2.03762	18.466	1.96175	0.143705	3.23357	0.0192545	2.57051	0.794944		122.943	3.13031	136.338	4.12545	377.418	44.1192	122.943	3.13031	NA
JG-WR46-12	116.623	2824.9	1.15472	22.1641	2.97904	0.119953	3.86209	0.0192907	2.45785	0.636404		123.172	2.99864	115.03	4.20016	NA	NA	123.172	2.99864	NA
JG-WR46-13	197.06	2476.25	0.604237	22.6163	2.74067	0.117721	3.99449	0.0193181	2.90597	0.727494		123.345	3.55028	113.004	4.27183	NA	NA	123.345	3.55028	NA
JG-WR46-14	209.076	2452.47	1.35195	21.3128	2.33228	0.125237	3.47491	0.019367	2.57594	0.741298		123.654	3.1549	119.809	3.92704	45.1417	55.7278	123.654	3.1549	NA
JG-WR46-15	446.063	7664.14	0.445758	20.9165	1.33282	0.12947	2.61391	0.0196492	2.24858	0.860238		125.439	2.79333	123.621	3.0424	89.8612	31.5659	125.439	2.79333	NA
JG-WR46-16	670.167	7936.35	0.744444	20.9251	1.77495	0.129586	3.21993	0.0196748	2.68654	0.834347		125.601	3.34165	123.725	3.75073	88.8879	42.0739	125.601	3.34165	NA
JG-WR46-17	290.5	14917.5	0.642878	15.9764	2.24459	0.170221	3.29594	0.0197324	2.4135	0.732266		125.965	3.01065	159.611	4.86808	694.411	47.8272	125.965	3.01065	NA
JG-WR46-18	139.14	968.938	1.05726	30.5078	8.87478	0.090883	9.23643	0.0201178	2.5593	0.277088		128.401	3.25365	88.3256	7.81353	NA	NA	128.401	3.25365	NA
JG-WR46-19	385.746	4314.23	1.17139	21.048	2.0725	0.131904	2.76614	0.0201445	1.83201	0.662299		128.569	2.33207	125.807	3.27306	74.978	49.243	128.569	2.33207	NA
JG-WR46-20	419.666	49304.3	1.29743	19.4322	1.70297	0.144758	3.14535	0.0204104	2.64445	0.840749		130.249	3.40982	137.273	4.0386	261.533	39.1279	130.249	3.40982	NA
JG-WR46-21	351.742	3761.55	1.34524	21.1228	2.60361	0.133417	3.25554	0.020448	1.95443	0.600339		130.487	2.52463	127.163	3.89113	66.5363	61.9966	130.487	2.52463	NA
JG-WR46-22	206.199	1706.24	1.34958	23.0626	2.29129	0.12393	3.17286	0.0207382	2.19477	0.691732		132.32	2.87451	118.628	3.55237	NA	NA	132.32	2.87451	NA
JG-WR46-23	241.226	2148	1.32534	22.9506	4.04366	0.1257	4.81595	0.0209324	2.61576	0.543146		133.546	3.45731	120.227	5.46046	NA	NA	133.546	3.45731	NA
JG-WR46-24	231.146	2017.52	1.28579	23.5176	2.29642	0.123223	3.68453	0.0210267	2.88136	0.782015		134.141	3.82516	117.99	4.1043	NA	NA	134.141	3.82516	NA
JG-WR46-25	119.884	722.927	1.73054	32.7712	34.6183	0.0885292	34.7264	0.0210507	2.73863	0.0788628		134.293	3.63974	86.1323	28.6848	NA	NA	134.293	3.63974	NA
JG-WR46-26	355.15	24484.4	1.39667	19.8914	1.83263	0.153583	3.10558	0.0221665	2.50721	0.807323		141.334	3.50497	145.071	4.19827	207.624	42.5024	141.334	3.50497	NA
JG-WR46-27	375.028	4566.28	1.80404	21.1515	2.50593	0.156485	3.44298	0.024016	2.36102	0.685749		152.988	3.56954	147.622	4.73043	63.2723	59.6942	152.988	3.56954	NA
JG-WR46-28	200.235	27229.4	1.21072	19.6809	1.81295	0.198948	3.22909	0.0284102	2.67212	0.827515		180.59	4.75863	184.236	5.44069	232.227	41.8354	180.59	4.75863	NA
JG-WR46-29	540.085	1833.36	1.79045	17.1561	1.63562	0.232924	3.18583	0.0289948	2.73391	0.858146		184.254	4.96603	212.61	6.11134	540.619	35.7713	184.254	4.96603	NA
JG-WR46-30	537.169	94113.4	1.08864	19.5071	1.33738	0.206175	3.12794	0.0291821	2.82762	0.903987		185.428	5.1685	190.338	5.42899	252.709	30.7632	185.428	5.1685	NA
JG-WR46-31	39.0468	1106.03	1.72295	26.2667	14.108	0.155961	14.2949	0.029724	2.30376	0.16116		188.821	4.2869	147.161	19.5856	NA	NA	188.821	4.2869	NA
JG-WR46-32	148.48	4059.66	1.29922	17.5199	3.11083	0.238599	4.09733	0.0303311	2.66661	0.650817		192.62	5.06045	217.272	8.01451	494.532	68.5826	192.62	5.06045	NA
JG-WR46-33	175.633	1975.42	1.57068	21.6256	2.01892	0.202316	3.05763	0.0317457	2.29632	0.751012		201.465	4.55473	187.084	5.22433	10.2338	48.574	201.465	4.55473	NA
JG-WR46-34	1662.98	26358.6	3.2869	19.7201	1.19187	0.222748	3.17596	0.0318721	2.94384	0.926913		202.254	5.86161	204.195	5.87473	227.651	27.5629	202.254	5.86161	NA
JG-WR46-35	670.434	27799	1.56012	19.3298	1.29814	0.227639	2.64497	0.0319272	2.30449	0.871274		202.599	4.59627	208.248	4.98001	273.636	29.7493	202.599	4.59627	NA
JG-WR46-36	876.958	18934.9	1.15469	19.9205	1.6367	0.225241	2.54395	0.0325563	1.94754	0.765557		206.528	3.95846	206.262	4.74862	204.217	37.9811	206.528	3.95846	NA
JG-WR46-37	732.912	6557.35	1.28166	19.8562	2.32528	0.229544	3.42325	0.0330713	2.51232	0.733898		209.742	5.18458	209.822	6.48928	211.713	53.8758	209.742	5.18458	NA
JG-WR46-38	196.657	1284.98	1.51705	24.658	2.35927	0.184927	3.19353	0.0330861	2.15232	0.673963		209.834	4.4436	172.291	5.06073	NA	NA	209.834	4.4436	NA
JG-WR46-39	295.214	22495.8	1.10648	19.2226	1.21202	0.24523	2.80954	0.0342038	2.53467	0.902164		216.805	5.40391	222.694	5.61816	286.36	27.7138	216.805	5.40391	NA
JG-WR46-40	218.116	12104.2	1.66658	19.3032	1.29565	0.245057	2.45406	0.0343229	2.08416	0.849268		217.547	4.45838	222.553	4.90452	276.831	29.6789	217.547	4.45838	NA
JG-WR46-41	159.855	4347.02	0.929447	20.4279	3.93701	0.233764	4.71518	0.0346487	2.59478	0.550303		219.578	5.60161	213.301	9.07161	145.547	92.3677	219.578	5.60161	NA
JG-WR46-42	428.491	8058.61	0.805742	20.175	1.97033	0.237703	2.88237	0.0347966	2.10377	0.729875		220.499	4.56035	216.538	5.62085	174.682	45.9529	220.499	4.56035	NA
JG-WR46-43	243.861	5418.67	1.91853	20.2055	1.88729	0.239144	2.81804	0.0350604	2.09272	0.742615		222.142	4.56963	217.719	5.52229	171.156	44.042	222.142	4.56963	NA
JG-WR46-44	109.212	35641.2	0.994113	19.9404	1.75677	0.243201	3.2401	0.0351874	2.7225	0.840252		222.933	5.9656	221.039	6.43603	201.932	40.7794	222.933	5.9656	NA
JG-WR46-45	1063	4816.28	1.42808	16.9363	2.10826	0.293095	3.43405	0.0360175	2.71072	0.789363		228.1	6.07503	260.992	7.90357	568.773	45.8904	228.1	6.07503	NA
JG-WR46-46	161.679	3618.98	1.54185	19.9575	2.93643	0.249292	3.82682	0.0360997	2.45397	0.641254		228.612	5.51174	226.001	7.75392	199.928	68.1909	228.612	5.51174	NA
JG-WR46-47	96.0955	2109.14	0.995453	21.7658	3.16853	0.229048	3.95315	0.0361733	2.36387	0.59797		229.07	5.31983	209.412	7.48065	NA	NA	229.07	5.31983	NA
JG-WR46-48	784.943	36161.7	1.36628	19.9441	0.88284	0.253518	2.21466	0.0366869	2.03108	0.91711		232.264	4.6335	229.43	4.54797	201.492	20.5183	232.264	4.6335	NA
JG-WR46-49	474.154	8377.58	2.94026	19.8839	1.22441	0.254486	2.84445	0.0367158	2.56743	0.902612		232.444	5.86153	230.214	5.85911	208.536	28.4017	232.444	5.86153	NA
JG-WR46-50	403.17	17171.6	2.1174	19.31	1.00908	0.265072	2.60361	0.0371393	2.40012	0.921841		235.077	5.54048	238.746	5.53936	275.98	23.0909	235.077	5.54048	NA
JG-WR46-51	382.779	9310.7	1.21777	19.9355	1.63545	0.259719	3.08175	0.0375681	2.61199	0.847567		237.741	6.09666	234.441	6.45153	202.497	37.9698	237.741	6.09666	NA
JG-WR46-52	148.11	11629.9	1.77325	19.0574	1.97545	0.273064	3.18617	0.0377585	2.49986	0.784596		238.924	5.86343	245.14	6.93937	306.072	44.9984	238.924	5.86343	NA
JG-WR46-53	236.338	3244.89	2.58229	19.0862	2.91816	0.273379	3.83057	0.0378594	2.48145	0.647803		239.551	5.83525	245.392	8.35047	302.633	66.5206	239.551	5.83525	NA
JG-WR46-54	616.132	5974.25	2.09373	20.6029	2.90144	0.254664	4.85943	0.0380701	3.89816	0.802186		240.859	9.21585	230.358	10.0154	125.497	68.3433	240.859	9.21585	NA
JG-WR46-55	258.282	8467.3	1.49316	20.4165	1.23828	0.258593	2.4225	0.0383076	2.08211	0.859488		242.334	4.95201	233.532	5.05393	146.897	29.0235	242.334	4.95201	NA
JG-WR46-56	320.027	770590	1.30378	18.8103	1.16293	0.28115	3.27623	0.0383728	3.06289	0.934881		242.739	7.29658	251.57	7.30047	335.726	26.3493	242.739	7.29658	NA
JG-WR46-57	109.067	1727.23	0.787276	21.1236	9.02761	0.250539	9.54475	0.0383999	3.0991	0.324692		242.907	7.38788	227.014	19.4189	66.4306	215.241	242.907	7.38788	NA
JG-WR46-58	303.596	12078.4	1.52923	19.0882	1.51108	0.279957	2.72865	0.0387743	2.27204	0.832661		245.231	5.4671	250.624	6.06009	302.423	34.4587	245.231	5.4671	NA
JG-WR46-59	631.371	22811.9	1.7888	19.1707	1.11173	0.27918	2.7734	0.0388339	2.54083	0.916143		245.601	6.12294	250.007	6.14612	292.531	25.3859	245.601	6.12294	NA
JG-WR46-60	140.872	8795.28	1.43936	19.3087	1.4906	0.278917	3.15255	0.0390765	2.77789	0.881157		247.106	6.73446	249.798	6.98123	276.133	34.141	247.106	6.73446	NA
JG-WR46-61	318.48	30710.8	1.25104	19.3555	1.48442	0.278577	4.60872	0.0391234	4.36311	0.946709		247.397	10.5897	249.528	10.1963	270.589	34.0541	247.397	10.5897	NA
JG-WR46-62	227.915	7450.15	1.73566	19.284	1.97289	0.280791	2.95738	0.0392888	2.20314	0.744962		248.423	5.36898	251.285	6.58338	279.111	45.1501	248.423	5.36898	NA
JG-WR46-63	189.466	2024.35	1.58386	21.6638	2.7045	0.250508	3.95157	0.039377	2.88108	0.729097		248.97	7.03628	226.988	8.03792	5.96367	65.126	248.97	7.03628	NA
JG-WR46-64	819.38	52357.5	1.96891	19.0696	1.00146	0.284682	2.69682	0.0393903	2.50398	0.928494		249.053	6.1173	254.365	6.06808	304.599	22.7994	249.053	6.1173	NA
JG-WR46-65	1055.32	38221.7	11.2536	19.5504	0.904857	0.278087	3.04902	0.0394479	2.91166	0.954949		249.41	7.12328	249.139	6.73621	247.599	20.8295	249.41	7.12328	NA
JG-WR46-66	461.834	7653.1	1.96479	19.7189	1.71412	0.277472	3.35026	0.0397	2.87854	0.859201		250.973	7.08555	248.65	7.38897	227.802	39.6076	250.973	7.08555	NA
JG-WR46-67	232.917	22569.9	1.41844	18.8795	1.59577	0.29041	3.28048	0.0397822	2.8662	0.873712		251.483	7.06921	258.882	7.49651	327.424	36.1961	251.483	7.06921	NA
JG-WR46-68	600.979	8286.33	1.49824	20.043	1.33767	0.274195	2.59904	0.0398759	2.22838	0.857384		252.064	5.50853	246.042	5.67899	190.017	31.0997	252.064	5.50853	NA
JG-WR46-69	58.7537	25180.4	1.02387	19.5446	2.91594	0.282355	4.1332	0.0400415	2.92928	0.708719		253.09	7.27007	252.524	9.24094	248.284	67.1367	253.09	7.27007	NA
JG-WR46-70	135.02	11797.4	0.63647	19.7991	2.14212	0.279582	3.20946	0.0401645	2.38997	0.744665		253.852	5.9491	250.326	7.1205	218.434	49.5839	253.852	5.9491	NA
JG-WR46-71	639.917	34983.1	1.41935	19.5105	1.22773	0.284008	2.3588	0.0402057	2.01411	0.853867		254.108	5.01844	253.832	5.29771	252.307	28.254	254.108	5.01844	NA
JG-WR46-72	231.814	4371.03	1.22547	20.1022	1.84627	0.277258	3.06699	0.0404403	2.44903	0.798511		255.561	6.13633	248.48	6.76011	183.116	43.0181	255.561	6.13633	NA
JG-WR46-73	197.319	13097.8	1.58236	18.761	1.9335	0.299586	3.17487	0.0407818	2.51821	0.793168		257.677	6.36087	266.077	7.43156	341.67	43.7562	257.677	6.36087	NA
JG-WR46-74	1019.4	39871.4	1.82706	19.123	1.01323	0.295758	2.66926	0.0410373	2.46948	0.925154		259.26	6.27533	263.081	6.18641	298.228	23.1377	259.26	6.27533	NA
JG-WR46-75	476.208	5710.09	1.71675	17.2708	4.02125	0.3276	5.1177	0.0410529	3.1655	0.61854		259.356	8.04697	287.732	12.8234	526.045	88.1916	259.356	8.04697	NA
JG-WR46-76	210.874	1577.96	1.31427	19.7436	9.86436	0.286638	10.4314	0.0410627	3.3923	0.325202		259.417	8.62547	255.91	23.6008	224.92	228.527	259.417	8.62547	NA
JG-WR46-77	348.456	8975.66	1.41988	19.4077	1.23459	0.291756	2.71113	0.0410849	2.41371	0.890297		259.554	6.14044	259.941	6.21764	264.441	28.3353	259.554	6.14044	NA
JG-WR46-78	504.381	3376.23	5.26428	20.7293	1.12515	0.275306	2.33757	0.0414084	2.04897	0.876537		261.557	5.25195	246.927	5.12388	111.072	26.5792	261.557	5.25195	NA
JG-WR46-79	1049.82	73810.5	4.30808	19.2802	1.04355	0.296369	2.66761	0.0414603	2.45503	0.920308		261.878	6.30034	263.56	6.19245	279.556	23.901	261.878	6.30034	NA
JG-WR46-80	460.687	22488.8	6.13841	19.2732	1.01716	0.297287	2.20335	0.0415735	1.95451	0.887065		262.579	5.02901	264.279	5.12691	280.395	23.2939	262.579	5.02901	NA
JG-WR46-81	132.335	1878.18	1.50952	21.3824	4.15434	0.268653	5.33493	0.0416808	3.34708	0.62739		263.243	8.63349	241.616	11.4716	37.3414	99.459	263.243	8.63349	NA
JG-WR46-82	611.332	18847.5	2.64023	19.2274	1.19512	0.301519	3.12991	0.0420652	2.89276	0.924229		265.621	7.52763	267.586	7.36264	285.797	27.3077	265.621	7.52763	NA
JG-WR46-83	149.824	29547.3	0.95621	19.0206	1.59199	0.305325	3.77594	0.0421381	3.42393	0.906776		266.072	8.92468	270.551	8.96829	310.458	36.2477	266.072	8.92468	NA
JG-WR46-84	343.17	4244.6	1.24808	19.9705	2.93985	0.291734	4.30031	0.042273	3.13846	0.729822		266.907	8.20573	259.924	9.86183	198.45	68.3179	266.907	8.20573	NA
JG-WR46-85	118.847	12255.9	1.20613	19.0024	1.816	0.307276	3.41343	0.0423668	2.89027	0.846734		267.487	7.5729	272.068	8.1469	312.642	41.3405	267.487	7.5729	NA
JG-WR46-86	237.612	43584.7	1.47407	18.1827	1.53979	0.328111	3.27087	0.043288	2.88576	0.882262		273.181	7.71867	288.123	8.2052	412.09	34.4298	273.181	7.71867	NA
JG-WR46-87	29.2793	1798.82	1.32041	22.191	3.72059	0.272738	4.78705	0.0439148	3.01216	0.62923		277.053	8.16848	244.881	10.4165	NA	NA	277.053	8.16848	NA
JG-WR46-88	414.585	5616.4	1.79197	19.4093	1.54135	0.313462	3.10367	0.0441451	2.69388	0.867966		278.475	7.34206	276.861	7.52109	264.265	35.3811	278.475	7.34206	NA
JG-WR46-89	149.906	2110.52	1.54961	21.135	2.9072	0.287966	3.69768	0.0441603	2.28497	0.617946		278.569	6.22964	256.957	8.39471	65.1217	69.211	278.569	6.22964	NA
JG-WR46-90	213.761	6790.96	1.42771	19.5461	1.36111	0.311445	3.01144	0.0441702	2.68629	0.892028		278.63	7.32537	275.301	7.26179	248.079	31.3481	278.63	7.32537	NA
JG-WR46-91	192.956	9746.82	1.49214	19.0089	1.65954	0.320523	3.09374	0.0442084	2.61097	0.843952		278.866	7.12586	282.305	7.62492	311.862	37.7802	278.866	7.12586	NA
JG-WR46-92	447.321	20955.4	1.32387	19.0641	1.17529	0.321503	3.37035	0.0444722	3.15879	0.937229		280.494	8.67024	283.058	8.32591	305.273	26.7746	280.494	8.67024	NA
JG-WR46-93	80.5072	963.127	1.73667	26.5193	6.41032	0.237245	7.21485	0.0456507	3.31086	0.458895		287.764	9.31794	216.162	14.0484	NA	NA	287.764	9.31794	NA
JG-WR46-94	349.33	23798	1.52877	18.104	1.25668	0.353275	2.35739	0.0464062	1.9945	0.846063		292.42	5.702	307.181	6.24875	421.779	28.0514	292.42	5.702	NA
JG-WR46-95	230.569	7571.14	2.11361	18.9001	1.43689	0.359648	2.84489	0.0493207	2.45535	0.863074		310.35	7.43966	311.952	7.64108	324.925	32.6042	310.35	7.43966	NA
JG-WR46-96	249.238	4895.36	1.58282	14.1245	3.93045	0.481438	5.19411	0.0493403	3.39563	0.653747		310.47	10.2926	399.059	17.1411	951.63	80.4331	310.47	10.2926	NA
JG-WR46-97	566.718	27197.1	0.976229	18.8664	0.969789	0.363685	2.82776	0.0497855	2.65626	0.939352		313.205	8.12066	314.962	7.65758	328.98	22.0109	313.205	8.12066	NA
JG-WR46-98	391.781	23890.4	1.81106	18.3304	1.20798	0.378616	2.66831	0.0503569	2.37922	0.891657		316.712	7.35316	326.019	7.44097	393.976	27.0949	316.712	7.35316	NA
JG-WR46-99	320.07	19468	1.88506	18.6326	1.14677	0.379657	2.93848	0.051328	2.70547	0.920704		322.669	8.51486	326.786	8.21075	357.174	25.8803	322.669	8.51486	NA
JG-WR46-100	260.439	10317.8	0.771426	18.9505	1.1663	0.380355	2.63488	0.0522994	2.3627	0.896701		328.623	7.5698	327.299	7.3722	318.862	26.5109	328.623	7.5698	NA
JG-WR46-101	233.744	11195.7	3.74502	18.7574	1.27731	0.387197	2.47336	0.0526978	2.11802	0.856332		331.063	6.83496	332.32	7.01	342.099	28.8997	331.063	6.83496	NA
JG-WR46-102	1207.94	19000.7	3.03461	18.7393	0.87929	0.388851	2.23926	0.0528719	2.0594	0.919679		332.13	6.66667	333.53	6.36601	344.27	19.8835	332.13	6.66667	NA
JG-WR46-103	277.058	11844.9	2.96434	18.4306	1.6905	0.400842	2.92486	0.0536044	2.38684	0.816053		336.613	7.82826	342.259	8.49825	381.735	37.9891	336.613	7.82826	NA
JG-WR46-104	82.8125	2051.5	2.0208	18.6985	1.96814	0.397047	3.06954	0.0538686	2.35552	0.767387		338.229	7.76166	339.504	8.85818	349.25	44.4975	338.229	7.76166	NA
JG-WR46-105	2305.62	74996.3	2.16227	18.8419	0.813715	0.40243	2.04866	0.0550178	1.88013	0.917735		345.254	6.32047	343.409	5.96918	331.935	18.4467	345.254	6.32047	NA
JG-WR46-106	454.471	15959.8	1.55873	18.4493	1.13892	0.418321	2.94627	0.0559985	2.71724	0.922263		351.244	9.28878	354.849	8.82365	379.459	25.6125	351.244	9.28878	NA
JG-WR46-107	388.1	12331.6	1.28749	18.2768	1.17042	0.423836	3.38955	0.0562064	3.18106	0.938492		352.513	10.9126	358.79	10.2453	400.543	26.2227	352.513	10.9126	NA
JG-WR46-108	559.234	26187.4	2.50601	18.7506	0.91755	0.417999	2.44679	0.0568693	2.26824	0.927024		356.558	7.86798	354.62	7.32376	342.937	20.7448	356.558	7.86798	NA
JG-WR46-109	396.88	8940.05	2.05629	18.8136	1.21088	0.421739	2.66032	0.0575711	2.36877	0.890407		360.837	8.31259	357.294	8.01304	335.311	27.4435	360.837	8.31259	NA
JG-WR46-110	1066.76	24530.8	4.42259	18.7112	1.05805	0.428125	2.73512	0.0581247	2.52218	0.922148		364.21	8.93138	361.844	8.32568	347.706	23.906	364.21	8.93138	NA
JG-WR46-111	230.256	15106.3	2.286	18.0063	1.44422	0.451084	3.01303	0.0589345	2.64435	0.877638		369.143	9.4872	378.038	9.51066	433.849	32.1868	369.143	9.4872	NA
JG-WR46-112	718.581	17990.5	1.19097	18.2048	0.946229	0.446184	3.08702	0.058937	2.93843	0.951865		369.158	10.5427	374.604	9.67105	409.376	21.1669	369.158	10.5427	NA
JG-WR46-113	434.175	18000.8	1.2546	18.1269	1.09489	0.457813	2.51593	0.0602141	2.26519	0.900341		376.927	8.29331	382.736	8.02275	418.967	24.4524	376.927	8.29331	NA
JG-WR46-114	485.05	9902.88	2.06505	18.6127	1.40122	0.447079	3.46082	0.0603784	3.16446	0.914369		377.926	11.6155	375.232	10.8572	359.592	31.61	377.926	11.6155	NA
JG-WR46-115	741.584	17921.6	2.49352	17.3726	1.98833	0.486264	3.44945	0.0612951	2.81874	0.817155		383.497	10.4945	402.362	11.4597	513.126	43.702	383.497	10.4945	NA
JG-WR46-116	326.458	9385.23	3.60612	18.1289	1.28634	0.523003	2.87466	0.0687959	2.5708	0.894296		428.897	10.6673	427.155	10.0238	418.719	28.7289	428.897	10.6673	102.431
JG-WR46-117	1035.07	17027.3	8.03792	17.8461	0.948559	0.563966	2.08178	0.073027	1.85312	0.89016		454.366	8.13008	454.105	7.62253	453.769	21.0748	454.366	8.13008	100.132
JG-WR46-118	78.8302	1248.79	2.82551	21.7633	1.86052	0.474769	3.31612	0.0749712	2.74502	0.82778		466.036	12.3413	394.478	10.8401	NA	NA	466.036	12.3413	NA
JG-WR46-119	366.701	18337.6	3.92066	17.5237	1.14097	0.600318	2.84339	0.0763301	2.60443	0.91596		474.18	11.9064	477.436	10.8307	494.085	25.136	474.18	11.9064	95.9714
JG-WR46-120	326.307	16048.6	4.46359	17.4765	1.07102	0.611283	2.89331	0.0775148	2.68778	0.928963		481.272	12.4644	484.369	11.1458	500.033	23.5784	481.272	12.4644	96.2479
JG-WR46-121	238.53	24197.7	3.61145	17.6692	1.24005	0.605111	3.04227	0.0775781	2.77807	0.913157		481.65	12.893	480.472	11.646	475.827	27.436	481.65	12.893	101.224
JG-WR46-122	840.065	25394.5	1.50882	17.102	1.04473	0.640098	2.57704	0.0794293	2.35578	0.91414		492.715	11.1748	502.367	10.2127	547.498	22.8306	492.715	11.1748	89.994
JG-WR46-123	165.071	7463.57	1.85488	17.0838	2.11072	0.641204	3.55233	0.0794817	2.85726	0.804333		493.029	13.5619	503.051	14.093	549.865	46.1051	493.029	13.5619	89.6635
JG-WR46-124	368.136	19055.4	1.55863	16.9594	1.22607	0.650257	3.19923	0.0800172	2.95496	0.92365		496.225	14.1131	508.637	12.8006	565.76	26.6998	496.225	14.1131	87.7095
JG-WR46-125	590.839	353332	1.22218	17.082	0.890396	0.656559	3.06901	0.0813766	2.937	0.956989		504.335	14.2478	512.507	12.3514	550.063	19.4404	504.335	14.2478	91.6866
JG-WR46-126	1200.04	75194.7	7.57957	16.39	0.783648	0.847387	2.52035	0.100774	2.39542	0.950433		618.945	14.1369	623.214	11.7391	639.701	16.8632	618.945	14.1369	96.7553
JG-WR46-127	567.897	27801.1	6.1367	15.8948	1.25064	0.877753	7.24108	0.101231	7.13226	0.984972		621.622	42.2657	639.769	34.3822	705.295	26.6302	621.622	42.2657	88.1364
JG-WR46-128	1731.71	87378.4	2.7453	16.3465	0.981933	0.854877	2.3386	0.101395	2.12246	0.907579		622.579	12.596	627.323	10.9444	645.417	21.1101	622.579	12.596	96.4615
JG-WR46-129	439.098	35084.1	1.74025	16.2894	1.03846	0.874695	2.23321	0.103383	1.97708	0.885307		634.204	11.9417	638.113	10.5804	652.937	22.2863	634.204	11.9417	97.1309
JG-WR46-130	838.244	660972	3.37133	15.8083	0.887255	0.98163	2.2802	0.112596	2.1005	0.92119		687.804	13.7033	694.44	11.4696	716.888	18.8622	687.804	13.7033	95.9431
JG-WR46-131	1100.39	46207.2	36.7116	14.8607	1.71087	1.05153	3.88676	0.113384	3.48996	0.89791		692.371	22.9112	729.642	20.2311	846.804	35.5835	692.371	22.9112	81.7628
JG-WR46-132	894.533	62641.5	20.2522	14.5163	1.91	1.14162	4.70152	0.120245	4.29607	0.913761		731.973	29.7267	773.28	25.453	895.377	39.4437	731.973	29.7267	81.7503
JG-WR46-133	261.307	12072.1	4.57755	14.7946	1.26676	1.193	3.8558	0.128066	3.64178	0.944492		776.821	26.6522	797.351	21.3015	856.052	26.3235	776.821	26.6522	90.7447
JG-WR46-134	237.205	6592.67	4.87876	14.0927	1.19651	1.49191	2.83506	0.152555	2.5702	0.906577		915.268	21.9306	927.095	17.2363	956.2	24.4448	956.2	24.4448	95.7193
JG-WR46-135	547.069	39915	3.10851	13.603	0.944251	1.75594	2.58707	0.173314	2.40859	0.931012		1030.34	22.9352	1029.35	16.7386	1028.12	19.1135	1028.12	19.1135	100.216
JG-WR46-136	363.662	14163.3	3.72403	13.5094	1.11046	1.76622	2.93636	0.173128	2.71829	0.925734		1029.33	25.8606	1033.13	19.0392	1042.06	22.4268	1042.06	22.4268	98.7776
JG-WR46-137	247.078	47978.3	5.28318	13.4938	1.13206	1.68082	3.26902	0.164567	3.06675	0.938124		982.107	27.9368	1001.29	20.8143	1044.39	22.8554	1044.39	22.8554	94.0361
JG-WR46-138	119.679	30329.6	1.66395	13.4277	1.3291	1.83294	2.59227	0.178582	2.22562	0.858559		1059.22	21.7394	1057.33	17.0319	1054.34	26.7805	1054.34	26.7805	100.463
JG-WR46-139	236.138	68303.1	2.7038	13.2672	0.953986	1.87735	3.70594	0.180722	3.58105	0.966299		1070.92	35.3343	1073.13	24.5564	1078.47	19.1345	1078.47	19.1345	99.2999
JG-WR46-140	168.827	19445.9	4.33646	13.2127	0.947957	1.97302	2.40082	0.189152	2.20574	0.918747		1116.78	22.6177	1106.34	16.1793	1086.74	18.9941	1086.74	18.9941	102.764
JG-WR46-141	847.749	466396	14.442	13.1167	0.828735	2.00049	2.9065	0.190392	2.78585	0.958489		1123.5	28.7235	1115.68	19.6788	1101.32	16.5751	1101.32	16.5751	102.014
JG-WR46-142	584.288	125080	7.13722	12.8262	0.953647	2.06745	4.08977	0.192407	3.97703	0.972434		1134.4	41.3695	1138.09	27.996	1146	18.9487	1146	18.9487	98.9878
JG-WR46-143	400.566	102591	2.00425	12.5842	0.937478	2.31424	2.22151	0.211311	2.01402	0.906596		1235.8	22.649	1216.66	15.7521	1183.75	18.5358	1183.75	18.5358	104.397
JG-WR46-144	701.638	564470	9.04333	12.4882	1.05891	2.23721	3.1419	0.20272	2.95808	0.941494		1189.92	32.1414	1192.78	22.0509	1198.82	20.8665	1198.82	20.8665	99.2569
JG-WR46-145	403.66	61671.4	1.72286	9.9292	0.898286	3.9299	2.63862	0.283128	2.48101	0.940267		1607.1	35.2909	1619.86	21.3606	1637.27	16.6824	1637.27	16.6824	98.157
JG-WR46-146	175.293	50340.4	0.691662	8.87097	0.779513	4.92384	2.19541	0.316929	2.05236	0.934841		1774.72	31.8401	1806.35	18.5308	1843.83	14.1059	1843.83	14.1059	96.2517
JG-AW27
JG-AW27-1	78.0973	16652.7	0.807202	19.1048	8.45515	0.397941	8.54447	0.0551392	1.23219	0.14421		345.997	4.15096	340.154	24.7019	300.436	193.103	345.997	4.15096	NA
JG-AW27-2	244.585	48469.1	5.17158	17.1285	1.13624	0.689572	1.42581	0.0856637	0.861337	0.604103		529.841	4.3812	532.543	5.90881	544.16	24.8544	529.841	4.3812	97.3686
JG-AW27-3	175.663	27663.6	1.32631	17.8268	2.19379	0.593054	2.35874	0.0766771	0.866554	0.367381		476.258	3.97826	472.816	8.91629	456.15	48.6822	476.258	3.97826	104.408
JG-AW27-4	170.15	41511.2	3.51741	17.0596	1.64615	0.759096	3.20231	0.0939214	2.74681	0.857759		578.687	15.2029	573.488	14.0323	552.926	35.9478	578.687	15.2029	104.659
JG-AW27-5	134.604	18968.4	1.35453	19.1302	2.87692	0.408308	4.69213	0.0566509	3.70667	0.789976		355.226	12.8109	347.656	13.8139	297.365	65.6552	355.226	12.8109	NA
JG-AW27-6	54.217	6525.48	1.45725	19.9587	11.0286	0.309271	11.315	0.0447682	2.52996	0.223593		282.321	6.98847	273.616	27.1456	199.797	256.787	282.321	6.98847	NA
JG-AW27-7	65.4524	13371.9	2.14774	13.2381	2.77848	1.98584	3.12571	0.190665	1.43184	0.458083		1124.97	14.7806	1110.71	21.1115	1082.87	55.7349	1082.87	55.7349	103.888
JG-AW27-8	42.0811	12859.7	2.26872	16.6255	5.12785	0.845544	7.56897	0.101955	5.56726	0.735538		625.855	33.2054	622.2	35.2251	608.908	110.901	625.855	33.2054	102.783
JG-AW27-9	329.611	47024.7	0.708756	19.6347	2.42538	0.267035	2.60389	0.0380269	0.947504	0.36388		240.591	2.2376	240.32	5.57232	237.674	55.9584	240.591	2.2376	NA
JG-AW27-10	249.656	72508.3	2.23447	16.3134	1.90218	0.838076	3.02126	0.099158	2.34728	0.776921		609.473	13.6506	618.084	13.9883	649.732	40.852	609.473	13.6506	93.8037
JG-AW27-11	72.1167	29435	1.06319	18.1191	4.11587	0.57039	4.58432	0.0749559	2.0188	0.440371		465.945	9.07459	458.267	16.9087	419.928	91.9549	465.945	9.07459	110.958
JG-AW27-12	92.3213	12737.4	4.03475	17.6532	2.57833	0.666023	2.77588	0.0852731	1.02844	0.370494		527.521	5.20922	518.292	11.2682	477.792	57.0037	527.521	5.20922	110.408
JG-AW27-13	139.198	13504.8	1.46604	21.14	10.1093	0.132335	10.2388	0.0202898	1.62329	0.158544		129.487	2.08098	126.193	12.1506	64.5751	241.239	129.487	2.08098	NA
JG-AW27-14	56.2769	4067.09	0.829077	20.3709	13.7596	0.255205	13.9535	0.037705	2.31767	0.1661		238.592	5.4287	230.796	28.814	152.121	323.668	238.592	5.4287	NA
JG-AW27-15	80.9483	16994.8	1.91433	19.792	12.7311	0.269606	12.8523	0.0387008	1.76022	0.136958		244.775	4.22779	242.379	27.7191	219.224	295.628	244.775	4.22779	NA
JG-AW27-16	264.972	38816.3	1.96725	19.1172	2.70203	0.34255	2.81814	0.047495	0.800575	0.28408		299.124	2.34	299.102	7.30118	298.911	61.6269	299.124	2.34	NA
JG-AW27-17	463.64	50122.4	19.4872	19.6034	1.91859	0.282265	2.58789	0.0401317	1.73671	0.671094		253.649	4.31962	252.453	5.78441	241.338	44.2261	253.649	4.31962	NA
JG-AW27-18	441.441	280978	4.01632	10.9209	0.472184	3.18047	6.03645	0.25191	6.01795	0.996936		1448.32	78.0659	1452.43	46.6641	1458.42	8.97786	1458.42	8.97786	99.3074
JG-AW27-19	767.803	160871	37.2687	16.8313	0.318828	0.77099	0.595447	0.0941161	0.502897	0.844571		579.834	2.78867	580.331	2.63212	582.261	6.91357	579.834	2.78867	99.5832
JG-AW27-20	72.6002	5719.51	1.07503	21.2826	12.0829	0.230259	12.277	0.0355419	2.1745	0.177121		225.14	4.81118	210.413	23.3356	48.5451	289.473	225.14	4.81118	NA
JG-AW27-21	194.475	20718.3	1.10432	18.958	3.66634	0.282818	3.92484	0.0388865	1.40083	0.356914		245.927	3.38014	252.89	8.78626	317.954	83.3502	245.927	3.38014	NA
JG-AW27-22	91.472	38924.5	14.3197	14.8544	4.04032	1.13796	4.76058	0.122597	2.51772	0.528868		745.493	17.7248	771.54	25.7341	847.699	84.0507	745.493	17.7248	87.9431
JG-AW27-23	411.802	152906	1.01693	17.1388	0.639383	0.674264	0.918159	0.0838125	0.658942	0.717678		518.839	3.28488	523.302	3.75453	542.804	13.96	518.839	3.28488	95.5849
JG-AW27-24	576.319	14134	1.25305	19.3773	1.80121	0.257703	1.89302	0.0362169	0.582367	0.30764		229.341	1.31213	232.814	3.93847	268.003	41.3065	229.341	1.31213	NA
JG-AW27-25	172.168	4138.23	1.15537	18.5779	4.60453	0.397215	4.66552	0.0535206	0.751912	0.161164		336.1	2.46243	339.627	13.4685	363.814	103.879	336.1	2.46243	NA
JG-AW27-26	241.907	211752	1.45186	11.1333	0.511108	2.82947	0.871125	0.228469	0.705427	0.809789		1326.47	8.45733	1363.38	6.53555	1421.7	9.76628	1421.7	9.76628	93.3016
JG-AW27-27	213.295	13141.7	0.713194	20.0746	4.41753	0.252345	4.58939	0.0367401	1.24416	0.271094		232.595	2.84226	228.479	9.39006	186.313	102.887	232.595	2.84226	NA
JG-AW27-28	252.262	47587.7	1.05054	19.1527	2.15507	0.382258	2.24879	0.0530989	0.642456	0.285689		333.519	2.08823	328.699	6.31471	294.703	49.1788	333.519	2.08823	NA
JG-AW27-29	658.673	146700	1.12759	19.5943	1.69758	0.250693	2.83677	0.0356263	2.27277	0.801181		225.666	5.04012	227.139	5.77365	242.402	39.143	225.666	5.04012	NA
JG-AW27-30	449.269	25232.9	0.663764	19.9737	1.19087	0.245307	1.29968	0.0355358	0.52058	0.400545		225.102	1.15161	222.757	2.59956	198.061	27.6884	225.102	1.15161	NA
JG-AW27-31	384.762	45506.2	1.51134	17.686	0.755672	0.585025	1.43978	0.0750418	1.22553	0.851193		466.459	5.51467	467.686	5.39595	473.717	16.7299	466.459	5.51467	98.468
JG-AW27-32	130.554	226126	1.75964	5.2399	0.187065	11.8642	1.37613	0.450877	1.36336	0.990718		2399.15	27.3123	2593.74	12.8875	2749.43	3.07497	2749.43	3.07497	87.26
JG-AW27-33	215.29	21477.4	2.43099	18.6722	2.47483	0.402995	2.64952	0.0545751	0.946133	0.357096		342.549	3.15637	343.818	7.72766	352.385	55.9156	342.549	3.15637	NA
JG-AW27-34	224.037	73088.5	1.87364	16.6707	2.78331	0.722915	5.96606	0.0874058	5.27703	0.884509		540.177	27.3438	552.386	25.4233	603.028	60.2408	540.177	27.3438	89.5774
JG-AW27-35	237.934	51523	1.58174	18.9606	2.26082	0.327989	2.64699	0.0451037	1.37668	0.520094		284.39	3.83005	288.03	6.63825	317.641	51.4027	284.39	3.83005	NA
JG-AW27-36	104.648	19176.1	2.3786	19.4989	8.35892	0.285485	8.52736	0.040373	1.6865	0.197775		255.145	4.21897	254.999	19.2314	253.667	192.521	255.145	4.21897	NA
JG-AW27-37	408.606	193767	9.33088	13.1694	0.258286	1.97068	1.69279	0.188226	1.67297	0.988291		1111.76	17.0839	1105.54	11.4028	1093.31	5.18617	1093.31	5.18617	101.688
JG-AW27-38	174.676	18467.2	0.80979	19.043	5.74212	0.33466	5.85279	0.0462209	1.1328	0.19355		291.278	3.22618	293.117	14.9024	307.773	130.869	291.278	3.22618	NA
JG-AW27-39	507.014	24714	1.65899	20.9156	4.85885	0.146663	5.24156	0.022248	1.96612	0.375101		141.848	2.75843	138.961	6.80742	89.9217	115.186	141.848	2.75843	NA
JG-AW27-40	44.1793	7691.47	0.64116	17.4226	8.23409	0.758867	8.57095	0.0958911	2.37929	0.277599		590.284	13.4207	573.356	37.5655	506.803	181.388	590.284	13.4207	116.472
JG-AW27-41	76.1424	10694.7	0.769641	18.5181	8.02718	0.303797	8.44971	0.0408018	2.63856	0.312266		257.801	6.668	269.362	19.9941	371.079	181.02	257.801	6.668	NA
JG-AW27-42	250.753	61969.6	13.2808	16.8217	0.933061	0.762373	1.3527	0.0930112	0.97938	0.724021		573.322	5.37255	575.378	5.94162	583.489	20.258	573.322	5.37255	98.2575
JG-AW27-43	70.3509	12502.7	1.04987	17.8262	5.89323	0.419617	6.05959	0.0542514	1.41016	0.232715		340.57	4.67791	355.777	18.1887	456.197	130.852	340.57	4.67791	NA
JG-AW27-44	326.055	18751.5	1.46734	19.725	2.45005	0.30799	2.52758	0.0440609	0.621221	0.245777		277.955	1.69002	272.622	6.04328	227.077	56.6346	277.955	1.69002	NA
JG-AW27-45	146.819	27276.2	2.02342	17.8939	2.45607	0.569831	2.65003	0.0739521	0.995166	0.37553		459.922	4.41753	457.905	9.76758	447.776	54.5889	459.922	4.41753	102.712
JG-AW27-46	182.876	33435.5	1.59869	17.6653	2.30501	0.493625	4.11613	0.0632437	3.4102	0.828496		395.322	13.0762	407.378	13.8134	476.317	50.9927	395.322	13.0762	NA
JG-AW27-47	135.371	26843.1	2.34989	14.0201	0.952552	1.47052	9.42398	0.149528	9.37572	0.994879		898.315	78.6224	918.342	57.0169	966.765	19.4444	966.765	19.4444	92.9197
JG-AW27-48	113.374	7844.46	0.602583	20.2599	6.40325	0.278659	6.86254	0.0409458	2.46837	0.359688		258.693	6.25907	249.593	15.1868	164.879	149.792	258.693	6.25907	NA
JG-AW27-49	530.744	150494	4.83069	16.7823	1.03931	0.742427	2.48853	0.0903657	2.26111	0.908613		557.699	12.0801	563.821	10.7668	588.616	22.525	557.699	12.0801	94.7475
JG-AW27-50	81.8531	7106.78	0.989088	22.546	14.0539	0.235423	14.1176	0.0384962	1.34002	0.0949182		243.505	3.20215	214.666	27.3231	-90.9951	346.121	243.505	3.20215	NA
JG-AW27-51	100.063	25382.2	2.35079	13.5918	0.964132	1.80119	2.1415	0.177555	1.91219	0.892921		1053.6	18.5868	1045.89	13.9828	1029.79	19.5108	1029.79	19.5108	102.313
JG-AW27-52	397.829	61954.9	6.43718	16.4387	0.525235	0.865867	0.729377	0.103233	0.506083	0.693856		633.326	3.05274	633.32	3.4368	633.322	11.3291	633.326	3.05274	100.001
JG-AW27-53	181.991	17138.5	1.88407	18.4392	2.00546	0.411278	2.16814	0.0550018	0.823993	0.380046		345.157	2.76927	349.795	6.41572	380.681	45.0847	345.157	2.76927	NA
JG-AW27-54	91.6359	16228.1	1.61816	16.9544	1.61791	0.729533	2.25239	0.0897072	1.56704	0.695726		553.805	8.31604	556.279	9.64721	566.438	35.2088	553.805	8.31604	97.7697
JG-AW27-55	53.9304	3554.78	1.25291	18.6606	14.7	0.294292	14.7973	0.0398292	1.69425	0.114497		251.774	4.18345	261.932	34.1762	353.792	333.66	251.774	4.18345	NA
JG-AW27-56	174.877	50656.7	0.972272	20.104	4.02509	0.30965	4.18667	0.0451493	1.15189	0.275134		284.672	3.20777	273.91	10.0514	182.907	93.8023	284.672	3.20777	NA
JG-AW27-57	181.25	142367	1.5323	13.9024	1.74538	1.30422	3.67096	0.131504	3.22948	0.879739		796.439	24.1956	847.583	21.1008	983.964	35.5164	796.439	24.1956	80.9419
JG-AW27-58	165.376	16428	1.56546	19.1472	4.19613	0.300938	5.54745	0.0417907	3.62859	0.654102		263.923	9.3833	267.132	13.0307	295.36	95.8068	263.923	9.3833	NA
JG-AW27-59	100.196	14638.9	1.65632	18.9189	5.56058	0.437581	5.86316	0.0600418	1.85918	0.317096		375.88	6.78847	368.545	18.1232	322.691	126.39	375.88	6.78847	NA
JG-AW27-60	114.537	36090.3	2.94818	16.8904	2.83309	0.657806	3.40124	0.0805816	1.88203	0.553335		499.593	9.04737	513.271	13.7043	574.675	61.6151	499.593	9.04737	86.935
JG-AW27-61	129.348	19745.2	1.52937	19.3557	8.10166	0.2679	8.19497	0.0376079	1.23314	0.150475		237.988	2.88122	241.013	17.5836	270.566	185.99	237.988	2.88122	NA
JG-AW27-62	107.169	8553.62	1.15261	19.3959	11.832	0.154493	12.3149	0.0217329	3.41455	0.27727		138.598	4.682	145.871	16.7346	265.844	272.335	138.598	4.682	NA
JG-AW27-63	97.571	10693.1	1.53619	19.2902	3.85846	0.456885	3.92672	0.0639207	0.728991	0.185649		399.425	2.8234	382.089	12.5044	278.376	88.3455	399.425	2.8234	NA
JG-AW27-64	399.639	17685.1	1.31384	19.5309	1.87583	0.265965	2.43078	0.0376743	1.54595	0.635989		238.401	3.61825	239.463	5.1854	249.88	43.1577	238.401	3.61825	NA
JG-AW27-65	80.5952	14655.5	1.94346	16.568	3.00403	0.865133	3.35191	0.103956	1.48698	0.443622		637.552	9.02657	632.921	15.7881	616.393	64.8534	637.552	9.02657	103.433
JG-AW27-66	110.805	32692.2	2.03549	17.2522	4.09449	0.67261	5.03992	0.0841603	2.9387	0.583085		520.907	14.7058	522.298	20.5817	528.403	89.7628	520.907	14.7058	98.5815
JG-AW27-67	85.4978	19091.4	0.683789	16.5633	2.63439	0.693466	8.92048	0.083305	8.52262	0.955399		515.82	42.2491	534.881	37.1074	617	56.866	515.82	42.2491	83.6013
JG-AW27-68	94.7012	18629.4	1.89775	16.9582	4.09339	0.682123	4.30424	0.083896	1.33064	0.309146		519.336	6.63944	528.057	17.7246	565.956	89.1877	519.336	6.63944	91.7626
JG-AW27-69	314.185	84755.2	2.58652	16.2355	0.909846	0.880991	1.33668	0.103738	0.979231	0.732585		636.276	5.933	641.518	6.35693	660.011	19.4824	636.276	5.933	96.4038
JG-AW27-70	93.7638	23532	0.842292	17.3934	4.21443	0.674546	4.5385	0.0850934	1.6842	0.371093		526.454	8.51415	523.473	18.5654	510.494	92.6768	526.454	8.51415	103.126
JG-AW27-71	77.9835	7285.85	1.0108	19.8463	8.40548	0.271216	8.74065	0.0390385	2.39727	0.274267		246.871	5.80627	243.666	18.9374	212.877	195.029	246.871	5.80627	NA
JG-AW27-72	70.9583	23328.8	1.23506	19.1554	7.38488	0.39402	7.8516	0.0547406	2.66666	0.339633		343.56	8.92174	337.302	22.5376	294.381	168.77	343.56	8.92174	NA
JG-AW27-73	404.038	74805.9	3.11218	17.5726	1.10538	0.58834	4.25618	0.0749829	4.11014	0.965686		466.107	18.4815	469.807	16.0093	487.905	24.3836	466.107	18.4815	95.5323
JG-AW27-74	215.26	52763.6	1.8873	13.639	1.10072	1.6097	1.97277	0.15923	1.63714	0.82987		952.496	14.4964	973.991	12.3561	1022.77	22.2959	1022.77	22.2959	93.1286
JG-AW27-75	257.853	20827.2	0.859454	19.525	4.7408	0.25699	4.84916	0.036392	1.0194	0.210222		230.43	2.30751	232.239	10.0669	250.562	109.124	230.43	2.30751	NA
JG-AW27-76	36.2113	5690.94	1.96059	17.3624	8.95617	0.639573	9.11867	0.0805374	1.71378	0.187942		499.33	8.23437	502.042	36.133	514.402	197.071	499.33	8.23437	97.0699
JG-AW27-77	81.4124	3176.89	0.996884	17.048	15.6856	0.317896	15.8465	0.039306	2.25266	0.142155		248.53	5.49199	280.283	38.831	554.439	344.138	248.53	5.49199	NA
JG-AW27-78	229.542	25840	0.917986	19.789	4.40693	0.292149	4.59656	0.0419302	1.30662	0.284261		264.786	3.38967	260.249	10.5528	219.609	102.034	264.786	3.38967	NA
JG-AW27-79	465.632	2311.37	2.61359	18.0049	7.99237	0.373375	8.20139	0.0487567	1.83975	0.224322		306.884	5.51362	322.152	22.6436	434.024	178.247	306.884	5.51362	NA
JG-AW27-80	117.101	30537.4	2.86226	17.7475	3.20473	0.575561	3.60968	0.0740846	1.66117	0.4602		460.718	7.38622	461.605	13.39	466.018	71.017	460.718	7.38622	98.8627
JG-AW27-81	101.772	11314.2	6.30257	21.681	8.41257	0.247626	9.01554	0.0389382	3.24169	0.359567		246.248	7.83206	224.646	18.1711	4.08951	202.901	246.248	7.83206	NA
JG-AW27-82	402.948	35887.1	1.20559	19.5264	1.67845	0.284178	1.84817	0.040245	0.773634	0.418596		254.352	1.92944	253.966	4.15277	250.39	38.6455	254.352	1.92944	NA
JG-AW27-83	116.775	39641.5	2.46501	15.2896	2.64593	1.20562	4.92006	0.133692	4.14802	0.843083		808.895	31.5336	803.177	27.314	787.331	55.5462	808.895	31.5336	102.739
JG-AW27-84	225.33	68261.3	2.95659	16.3202	1.0271	0.896606	1.285	0.106127	0.772202	0.600936		650.216	4.77607	649.912	6.16826	648.852	22.0576	650.216	4.77607	100.21
JG-AW27-85	163.655	39082	2.41589	13.975	0.903036	1.56282	1.70913	0.158401	1.45109	0.849021		947.886	12.7913	955.585	10.5831	973.369	18.4275	973.369	18.4275	97.382
JG-AW27-86	488.447	3866.19	1.15988	19.1245	3.49714	0.263738	3.57418	0.0365816	0.738114	0.206513		231.609	1.67919	237.675	7.5741	298.058	79.7834	231.609	1.67919	NA
JG-AW27-87	36.997	1740.54	1.2318	26.4129	44.0371	0.111133	44.4267	0.021289	5.87018	0.132132		135.797	7.88818	107.001	45.1476	-494.99	1221.6	135.797	7.88818	NA
JG-AW27-88	274.679	190880	2.53307	14.7236	0.587663	1.33772	0.772701	0.142849	0.501716	0.649301		860.755	4.04264	862.239	4.48969	866.075	12.1933	860.755	4.04264	99.3857
JG-AW27-89	137.723	25243.4	1.67419	17.0664	2.90492	0.750286	4.03936	0.0928686	2.80676	0.694852		572.48	15.3753	568.39	17.5834	552.042	63.4078	572.48	15.3753	103.702
JG-AW27-90	474.624	77837.9	12.6206	18.988	1.34507	0.353825	1.58196	0.0487266	0.832707	0.526376		306.699	2.4941	307.594	4.19812	314.371	30.5824	306.699	2.4941	NA
JG-AW27-91	220.248	94545.4	1.88732	13.4759	0.573089	1.7297	2.39196	0.169055	2.32229	0.970874		1006.9	21.6486	1019.64	15.3912	1047.1	11.5747	1047.1	11.5747	96.1608
JG-AW27-92	104.417	15979.7	1.10365	20.2009	7.58022	0.270847	7.87399	0.0396819	2.1307	0.2706		250.861	5.24244	243.371	17.041	171.69	177.164	250.861	5.24244	NA
JG-AW27-93	325.904	31170.3	0.901377	20.1567	2.31098	0.249725	2.78008	0.0365072	1.54539	0.55588		231.147	3.50884	226.353	5.64079	176.806	53.9014	231.147	3.50884	NA
JG-AW27-94	800.845	416892	4.72219	17.0128	0.244267	0.721091	1.14579	0.0889743	1.11945	0.977011		549.468	5.89615	551.311	4.87442	558.908	5.30496	549.468	5.89615	98.311
JG-AW27-95	285.784	20257.9	0.864631	19.9851	3.74393	0.262474	3.86199	0.0380444	0.947607	0.245367		240.7	2.23883	236.658	8.15294	196.749	87.0255	240.7	2.23883	NA
JG-AW27-96	97.9411	20438.6	1.04942	19.1039	7.14052	0.285701	7.46583	0.0395852	2.17981	0.291971		250.261	5.35068	255.17	16.8469	300.547	163.015	250.261	5.35068	NA
JG-AW27-97	37.741	12634.4	1.06478	16.8366	7.58204	0.701318	7.96466	0.0856384	2.43894	0.30622		529.69	12.4023	539.578	33.349	581.561	164.881	529.69	12.4023	91.0809
JG-AW27-98	243.888	54163.4	1.53419	16.7106	1.36131	0.813002	1.86423	0.0985333	1.27365	0.683206		605.807	7.36442	604.137	8.48853	597.881	29.4644	605.807	7.36442	101.326
JG-AW27-99	67.4881	25279.1	1.667	13.4017	1.58369	1.85213	1.83576	0.180024	0.928411	0.505736		1067.11	9.13057	1064.19	12.1051	1058.23	31.883	1058.23	31.883	100.838
JG-AW27-100	106.45	10277.4	1.05244	20.4352	7.52707	0.258176	8.00142	0.0382643	2.71403	0.339194		242.065	6.44792	233.196	16.6729	144.702	176.773	242.065	6.44792	NA
JG-AW27-101	107.705	38480.2	0.626197	16.7419	2.28567	0.772147	2.40577	0.0937571	0.750604	0.312002		577.719	4.14775	580.994	10.6439	593.838	49.5438	577.719	4.14775	97.2856
JG-AW27-102	33.7976	5959.13	1.57232	14.611	6.75543	1.28451	7.36988	0.136118	2.94608	0.399745		822.671	22.7539	838.86	42.1001	881.982	139.869	822.671	22.7539	93.2752
JG-AW27-103	236.237	11272.3	2.80992	18.8748	5.86413	0.281559	6.79554	0.0385435	3.43386	0.505311		243.798	8.21538	251.894	15.1606	327.976	133.192	243.798	8.21538	NA
JG-AW27-104	243.54	77218.5	2.14247	17.1188	1.60953	0.710644	1.86804	0.0882318	0.948152	0.507564		545.071	4.95564	545.129	7.87985	545.365	35.1718	545.071	4.95564	99.9461
JG-AW27-105	212.443	11147.3	0.921297	20.3714	3.43736	0.252501	3.61983	0.0373063	1.13478	0.31349		236.114	2.6309	228.605	7.40986	152.041	80.5671	236.114	2.6309	NA
JG-AW27-106	109.827	8890.34	1.04829	20.4467	20.257	0.142051	21.3562	0.0210652	6.76312	0.316682		134.385	8.99452	134.869	26.9783	143.423	479.577	134.385	8.99452	NA
JG-AW27-107	293.371	45985.9	1.57929	18.6597	2.25154	0.428166	2.48238	0.0579448	1.04537	0.421117		363.115	3.69097	361.873	7.55683	353.909	50.8591	363.115	3.69097	NA
JG-AW27-108	103.232	22004.5	3.33237	16.2049	2.70827	0.914477	3.22287	0.107478	1.74704	0.542077		658.082	10.9296	659.435	15.6325	664.087	58.0239	658.082	10.9296	99.0958
JG-AW27-109	84.9961	13258.1	0.923628	19.1266	6.19663	0.313983	6.34682	0.0435554	1.37257	0.216261		274.833	3.693	277.264	15.4005	297.827	141.474	274.833	3.693	NA
JG-AW27-110	136.624	33518.9	0.873809	17.1896	2.4027	0.726301	3.28143	0.0905482	2.23491	0.681077		558.779	11.9623	554.38	14.0191	536.371	52.5682	558.779	11.9623	104.178
JG-AW27-111	319.828	45659	8.01059	16.9015	0.885861	0.734541	3.90112	0.0900412	3.79921	0.973876		555.781	20.2307	559.215	16.7761	573.238	19.2575	555.781	20.2307	96.9546
JG-AW27-112	149.477	9616.42	1.89702	20.1299	12.6622	0.134161	12.8784	0.019587	2.35023	0.182494		125.045	2.91053	127.83	15.4696	179.898	296.139	125.045	2.91053	NA
JG-AW31
JG-AW31-1	669.857	40637.4	0.829449	20.8063	2.52201	0.127206	2.6814	0.0191956	0.910697	0.339635		122.57	1.1057	121.584	3.07254	102.347	59.64	122.57	1.1057	NA
JG-AW31-2	136.635	10863.1	2.35825	19.2083	5.88527	0.393158	6.12066	0.0547714	1.68109	0.274659		343.749	5.62738	336.674	17.5403	288.077	134.605	343.749	5.62738	NA
JG-AW31-3	228.357	21549	0.734206	19.2165	2.004	0.396393	2.74589	0.0552458	1.8772	0.683639		346.647	6.33539	339.029	7.9148	287.085	45.8172	346.647	6.33539	NA
JG-AW31-4	90.3322	5648.92	1.33918	21.2443	9.1394	0.291972	9.72769	0.0449865	3.33154	0.342481		283.668	9.2456	260.11	22.3253	52.8404	218.494	283.668	9.2456	NA
JG-AW31-5	216.58	29589	1.45683	19.3621	3.20275	0.297614	3.69564	0.041793	1.84395	0.498952		263.938	4.76858	264.535	8.60671	269.803	73.4518	263.938	4.76858	NA
JG-AW31-6	82.7708	34256.9	1.15341	12.9289	2.65738	2.1246	2.96685	0.199223	1.31929	0.444678		1171.14	14.1286	1156.83	20.4865	1130.13	52.9329	1130.13	52.9329	103.629
JG-AW31-7	136.995	38108	1.9126	16.6463	3.36058	0.764132	3.8568	0.0922539	1.89245	0.490679		568.853	10.3039	576.391	16.9642	606.2	72.6968	568.853	10.3039	93.8392
JG-AW31-8	146.736	17167.5	1.49425	17.8726	5.92278	0.65331	6.18382	0.0846848	1.77772	0.287479		524.026	8.94713	510.514	24.8164	450.426	131.625	524.026	8.94713	116.34
JG-AW31-9	49.3014	2434.26	0.69228	21.6597	23.217	0.272895	23.3769	0.0428692	2.73017	0.116789		270.593	7.23476	245.005	50.9312	6.46156	565.43	270.593	7.23476	NA
JG-AW31-10	103.968	5284.22	1.0682	23.5975	13.9537	0.11914	14.3778	0.0203903	3.46633	0.241089		130.122	4.46525	114.292	15.5429	-204.029	351.295	130.122	4.46525	NA
JG-AW31-11	13.7535	1635.63	0.703523	17.5656	30.8627	0.556962	31.3522	0.0709558	5.51869	0.176022		441.911	23.5707	449.547	114.361	488.809	696.183	441.911	23.5707	90.4058
JG-AW31-12	225.948	14370.7	0.65102	20.0254	6.4258	0.232895	6.55609	0.0338253	1.30055	0.198372		214.445	2.74308	212.586	12.5757	192.061	149.574	214.445	2.74308	NA
JG-AW31-13	753.714	54007.3	2.84574	19.2691	2.30869	0.284594	2.63376	0.0397728	1.26752	0.481261		251.424	3.12552	254.295	5.92476	280.876	52.8368	251.424	3.12552	NA
JG-AW31-14	331.355	42839.7	1.46297	19.0755	3.15005	0.324918	3.4833	0.0449521	1.48681	0.42684		283.455	4.12314	285.679	8.67395	303.901	71.8065	283.455	4.12314	NA
JG-AW31-15	181.662	2119.64	0.882338	18.6678	14.6794	0.177125	15.52	0.0239813	5.03837	0.324638		152.769	7.60657	165.584	23.7169	352.96	333.218	152.769	7.60657	NA
JG-AW31-16	684.806	25488.8	1.15334	21.0416	5.43617	0.111884	5.77681	0.0170743	1.95436	0.338311		109.139	2.11501	107.687	5.90241	75.6602	129.25	109.139	2.11501	NA
JG-AW31-17	39.76	8031.3	3.51332	16.8799	8.40595	0.744845	9.18436	0.0911875	3.70033	0.402895		562.557	19.9341	565.229	39.83	575.978	183.024	562.557	19.9341	97.6698
JG-AW31-18	563.936	12158.3	1.23906	20.2024	5.03273	0.153976	5.53119	0.0225608	2.29471	0.414868		143.82	3.26372	145.417	7.494	171.521	117.531	143.82	3.26372	NA
JG-AW31-19	161.024	84034	2.02238	13.2824	1.30153	1.82486	3.01779	0.175794	2.7227	0.902215		1043.96	26.2417	1054.43	19.7973	1076.21	26.1312	1076.21	26.1312	97.0028
JG-AW31-20	57.4524	11375.4	1.41787	16.5732	8.68303	0.739726	8.92177	0.0889154	2.05011	0.229788		549.119	10.7914	562.246	38.5372	615.707	187.822	549.119	10.7914	89.1852
JG-AW31-21	295.172	19037.5	1.10298	18.5046	4.04759	0.425509	4.31408	0.0571066	1.49273	0.346014		358.005	5.19838	359.983	13.0762	372.727	91.1433	358.005	5.19838	NA
JG-AW31-22	492.776	13947.3	1.47101	19.7834	5.30627	0.117264	5.55358	0.0168254	1.63881	0.295091		107.561	1.7481	112.589	5.91858	220.271	122.845	107.561	1.7481	NA
JG-AW31-23	354.537	183261	3.83712	8.02264	0.413367	5.38015	1.36908	0.313048	1.30518	0.95333		1755.69	20.0595	1881.7	11.723	2023.78	7.3237	2023.78	7.3237	86.7529
JG-AW31-24	627.978	14244.6	1.28099	21.3876	6.38962	0.11347	6.65727	0.0176011	1.86871	0.280702		112.477	2.08365	109.135	6.88867	36.766	153.079	112.477	2.08365	NA
JG-AW31-25	611.674	33961.7	74.6013	20.5211	2.08282	0.163651	4.01808	0.0243567	3.43611	0.855161		155.132	5.26687	153.894	5.73785	134.866	48.9333	155.132	5.26687	NA
JG-AW31-26	88.5073	5469.27	0.782496	23.5727	23.496	0.240042	23.5646	0.0410389	1.79667	0.0762445		259.269	4.56579	218.455	46.3493	-201.396	595.705	259.269	4.56579	NA
JG-AW31-27	530.388	82927.9	12.8244	16.6247	0.487624	0.814815	1.28765	0.0982452	1.19175	0.925522		604.117	6.87251	605.151	5.87029	609.007	10.5415	604.117	6.87251	99.197
JG-AW31-28	829.069	88312.4	7.84988	16.2318	0.31292	0.884201	1.25147	0.104092	1.21172	0.968235		638.344	7.36431	643.249	5.96321	660.506	6.72711	638.344	7.36431	96.6448
JG-AW31-29	409.468	65801.7	1.37628	17.895	2.84924	0.516962	3.10059	0.0670948	1.22291	0.394412		418.629	4.95677	423.12	10.7294	447.646	63.3448	418.629	4.95677	93.5177
JG-AW31-30	123.529	14663.6	1.07774	19.2734	11.3346	0.373511	11.4287	0.0522109	1.46346	0.128051		328.081	4.68119	322.252	31.5672	280.361	260.156	328.081	4.68119	NA
JG-AW31-31	240.629	91472.1	1.80971	13.6745	0.751681	1.7972	2.39994	0.17824	2.27918	0.949684		1057.35	22.2265	1044.44	15.658	1017.51	15.2258	1017.51	15.2258	103.916
JG-AW31-32	154.721	9084.71	1.26557	20.0341	11.0887	0.291112	11.1819	0.0422987	1.44075	0.128847		267.066	3.76914	259.434	25.6055	191.06	258.604	267.066	3.76914	NA
JG-AW31-33	54.7773	3209.44	0.723577	20.2819	28.7552	0.291846	29.4377	0.0429301	6.3022	0.214086		270.969	16.7231	260.012	67.6268	162.346	684.829	270.969	16.7231	NA
JG-AW31-34	376.741	16911.8	2.72403	20.4823	5.83216	0.174887	7.30494	0.0259798	4.39863	0.602145		165.338	7.18013	163.651	11.0414	139.299	137.07	165.338	7.18013	NA
JG-AW31-35	377.331	161559	2.66119	13.638	1.09431	1.69147	2.52921	0.167307	2.28022	0.901553		997.255	21.0681	1005.32	16.1408	1022.91	22.1652	1022.91	22.1652	97.4919
JG-AW31-36	282.307	57316.9	1.18211	20.0177	4.73814	0.265305	5.10215	0.0385175	1.8926	0.370942		243.637	4.52504	238.933	10.863	192.957	110.249	243.637	4.52504	NA
JG-AW31-37	165.118	2292.77	1.18085	17.4055	3.43099	0.458249	4.39232	0.0578479	2.74241	0.624365		362.524	9.66754	383.039	14.0159	508.974	75.4786	362.524	9.66754	NA
JG-AW31-38	328.441	46742.8	3.88603	15.6709	2.41769	0.65009	3.80113	0.0738869	2.93315	0.771652		459.531	13.0095	508.534	15.2069	735.438	51.1752	459.531	13.0095	62.4839
JG-AW31-39	505.679	66692.1	1.08585	19.1615	2.48607	0.339129	3.27265	0.0471295	2.12831	0.650331		296.874	6.17511	296.511	8.41554	293.679	56.7677	296.874	6.17511	NA
JG-AW31-40	107.632	23094.6	2.26943	15.6795	3.54687	0.943428	6.39793	0.107285	5.32477	0.832265		656.963	33.2586	674.675	31.5464	734.279	75.1218	656.963	33.2586	89.4704
JG-AW31-41	573.846	46868.5	1.9847	18.7434	1.8739	0.388213	2.75856	0.0527736	2.02439	0.733856		331.527	6.54174	333.063	7.83312	343.795	42.3998	331.527	6.54174	NA
JG-AW31-42	177.124	12748.8	0.734585	22.0292	15.7661	0.118563	16.0388	0.0189429	2.94458	0.183591		120.972	3.52889	113.768	17.2636	-34.4255	384.523	120.972	3.52889	NA
JG-AW31-43	233.238	16028.5	0.579505	19.9133	5.88121	0.268056	6.01782	0.0387139	1.27496	0.211864		244.856	3.06327	241.138	12.9175	205.062	136.541	244.856	3.06327	NA
JG-AW31-44	422.332	22733.3	1.26313	19.7865	8.54661	0.145317	9.41969	0.0208537	3.96057	0.420457		133.049	5.21549	137.768	12.136	219.885	198.068	133.049	5.21549	NA
JG-AW31-45	234.645	4683.39	0.847091	22.2786	10.7494	0.122313	10.9225	0.0197633	1.93703	0.177343		126.16	2.41999	117.167	12.0873	-61.8089	262.819	126.16	2.41999	NA
JG-AW31-46	156.959	6453.75	0.660017	22.5967	13.6747	0.114289	13.9195	0.0187305	2.59892	0.18671		119.627	3.08035	109.881	14.4974	-96.5033	337.088	119.627	3.08035	NA
JG-AW31-47	100.383	5011.93	0.643218	21.2628	8.74523	0.258625	9.02464	0.0398831	2.22826	0.246908		252.109	5.5092	233.558	18.8315	50.7953	209.104	252.109	5.5092	NA
JG-AW31-48	311.963	9654.05	0.327597	22.7084	6.25705	0.111062	6.36565	0.0182916	1.17082	0.183928		116.85	1.35578	106.936	6.46109	-108.629	154.118	116.85	1.35578	NA
JG-AW31-49	591.915	2716.76	1.95065	18.1796	1.78033	0.460168	3.28706	0.0606736	2.76318	0.840624		379.721	10.1893	384.375	10.5188	412.471	39.8059	379.721	10.1893	NA
JG-AW31-50	89.8612	8593.07	0.744109	19.1963	8.66744	0.282326	9.24229	0.0393067	3.20863	0.347168		248.534	7.82278	252.501	20.6643	289.495	198.368	248.534	7.82278	NA
JG-AW31-51	244.437	21349.3	0.870048	19.8301	5.89535	0.141193	6.31427	0.0203065	2.26159	0.358171		129.593	2.90159	134.106	7.93258	214.801	136.646	129.593	2.90159	NA
JG-AW31-52	266.467	13858.6	5.08255	16.8974	5.26732	0.597412	5.70922	0.0732138	2.20237	0.385757		455.489	9.68536	475.59	21.6835	573.74	114.623	455.489	9.68536	79.3894
JG-AW31-53	277.535	2520.54	3.39226	15.2887	14.0167	0.841702	14.3128	0.0933313	2.89634	0.202361		575.209	15.9384	620.085	66.514	787.464	295.648	575.209	15.9384	73.0458
JG-AW31-54	401.96	31485.8	0.852645	17.0823	1.32943	0.701069	2.26145	0.086857	1.82942	0.80896		536.922	9.42464	539.429	9.46386	550.039	29.037	536.922	9.42464	97.6153
JG-AW31-55	119.121	26216	4.41456	12.7176	1.65734	1.87406	5.43568	0.172858	5.17685	0.952384		1027.84	49.1854	1071.97	36.0042	1162.84	32.8445	1162.84	32.8445	88.3901
JG-AW31-56	254.633	150707	1.4344	6.06234	0.292485	10.6375	2.39353	0.467712	2.37559	0.992506		2473.52	48.8018	2491.99	22.2186	2507.06	4.91766	2507.06	4.91766	98.6622
JG-AW31-57	503.238	38324.2	18.9417	18.3511	1.84898	0.328547	2.83984	0.0437277	2.15545	0.759004		275.898	5.82138	288.456	7.13101	391.447	41.4774	275.898	5.82138	NA
JG-AW31-58	397.527	24978.9	0.921291	19.3755	2.57441	0.319858	2.97384	0.0449478	1.48866	0.500586		283.429	4.12788	281.793	7.31786	268.219	59.0559	283.429	4.12788	NA
JG-AW31-59	559.313	72368.2	2.45914	19.4743	1.82021	0.307335	2.10551	0.0434083	1.0583	0.502634		273.924	2.83822	272.113	5.02592	256.558	41.8241	273.924	2.83822	NA
JG-AW31-60	227.18	42855.6	1.15843	18.4486	5.09465	0.40877	5.2115	0.054694	1.09742	0.210577		343.276	3.66864	347.989	15.3555	379.546	114.63	343.276	3.66864	NA
JG-AW31-61	333.925	36203.5	3.37157	18.6662	1.47005	0.411273	3.56102	0.0556781	3.24343	0.910814		349.288	11.0275	349.792	10.5375	353.13	33.191	349.288	11.0275	NA
JG-AW31-62	246.627	30439.4	8.68324	16.1705	1.32609	0.927854	4.04067	0.108818	3.81687	0.944613		665.879	24.1473	666.505	19.7489	668.602	28.3683	665.879	24.1473	99.5928
JG-AW31-63	235.785	55839.9	1.62739	16.9925	2.49674	0.737978	2.81979	0.0909491	1.31055	0.46477		561.148	7.04316	561.225	12.1581	561.535	54.4153	561.148	7.04316	99.931
JG-AW31-64	155.318	7548.34	1.20179	21.1918	8.24168	0.238353	8.38227	0.0366343	1.52874	0.182378		231.937	3.48268	217.071	16.3835	58.7793	196.727	231.937	3.48268	NA
JG-AW31-65	86.2375	27625.2	1.1116	13.7941	2.60772	1.60628	3.09153	0.160699	1.66052	0.537119		960.662	14.8203	972.661	19.3489	999.846	52.9878	999.846	52.9878	96.081
JG-AW31-66	312.108	26142.8	1.84781	18.8447	1.78576	0.422853	2.10619	0.0577933	1.11674	0.530216		362.191	3.93319	358.089	6.35569	331.581	40.4789	362.191	3.93319	NA
JG-AW31-67	294.584	5062.25	0.814435	19.3463	9.04992	0.140965	9.29205	0.0197792	2.1074	0.226797		126.261	2.63493	133.903	11.6574	271.671	207.827	126.261	2.63493	NA
JG-AW31-68	460.385	9984.23	1.88059	9.31281	0.43873	4.12584	2.47445	0.278671	2.43525	0.984156		1584.67	34.2136	1659.44	20.2262	1755.39	8.0269	1755.39	8.0269	90.2743
JG-AW31-69	538.845	45090	1.79126	20.2097	3.11534	0.196197	3.17755	0.0287575	0.625697	0.196911		182.767	1.12751	181.903	5.29196	170.668	72.7547	182.767	1.12751	NA
JG-AW31-70	106.509	8284.65	0.593437	20.7906	10.0883	0.276519	10.4181	0.0416957	2.60044	0.249609		263.335	6.7099	247.893	22.9187	104.124	238.959	263.335	6.7099	NA
JG-AW31-71	400.871	99218.6	2.20088	14.7809	3.18333	0.850704	6.88688	0.0911963	6.107	0.886759		562.608	32.9022	625.035	32.1543	857.983	66.1235	562.608	32.9022	65.5734
JG-AW31-72	365.132	25840.4	0.586118	19.7652	2.27137	0.273755	2.79804	0.0392429	1.63399	0.583975		248.139	3.97751	245.691	6.10613	222.4	52.5384	248.139	3.97751	NA
JG-AW31-73	252.984	24001.3	0.750195	19.2855	4.13463	0.306971	4.3702	0.0429364	1.41546	0.323888		271.009	3.75649	271.83	10.4226	278.934	94.6887	271.009	3.75649	NA
JG-AW31-74	405.871	10853.6	1.0035	21.7171	11.2414	0.116289	11.6175	0.0183164	2.93241	0.252413		117.007	3.40017	111.702	12.2893	0.0802995	271.683	117.007	3.40017	NA
JG-AW31-75	1013.68	1458.75	0.493415	19.8437	5.86052	0.160477	5.9672	0.023096	1.12333	0.188251		147.193	1.63473	151.121	8.37891	213.172	135.88	147.193	1.63473	NA
JG-AW31-76	59.764	6617.26	1.83182	17.0085	10.1715	0.713175	10.2087	0.0879753	0.870142	0.0852356		543.552	4.53576	546.63	43.1773	559.504	222.248	543.552	4.53576	97.1489
JG-AW31-77	66.5331	4179.43	0.859286	20.0171	9.60349	0.262649	11.078	0.0381307	5.5223	0.498491		241.236	13.0756	236.799	23.4025	193.03	223.724	241.236	13.0756	NA
JG-AW31-78	1712.51	1504.46	0.627567	19.3428	5.07677	0.173929	5.66285	0.0244	2.50885	0.443036		155.404	3.85224	162.823	8.51931	272.088	116.418	155.404	3.85224	NA
JG-AW31-79	522.999	13890.5	0.482923	20.3338	5.62078	0.123397	5.84577	0.0181979	1.6062	0.274763		116.257	1.85057	118.147	6.52	156.373	131.682	116.257	1.85057	NA
JG-AW31-80	1933.36	1956.49	0.567647	19.8327	3.35412	0.127413	3.79783	0.0183272	1.78139	0.469054		117.075	2.06674	121.771	4.35813	214.505	77.7146	117.075	2.06674	NA
JG-AW31-81	231.431	14085.7	2.40454	14.1388	1.74957	1.59054	3.08659	0.1631	2.54284	0.823836		973.979	22.9867	966.507	19.2449	949.548	35.8241	949.548	35.8241	102.573
JG-AW31-82	285.66	107368	1.28298	9.85565	0.540301	3.58568	1.81538	0.256304	1.73311	0.954683		1470.91	22.7933	1546.37	14.4143	1651.07	10.0162	1651.07	10.0162	89.0883
JG-AW31-83	363.615	15094.5	1.15981	20.0039	4.42075	0.201217	4.59221	0.0291929	1.24311	0.2707		185.495	2.27305	186.155	7.81093	194.563	102.804	185.495	2.27305	NA
JG-AW31-84	217.119	19734.1	0.925875	18.0344	3.82785	0.381052	4.78507	0.0498409	2.87131	0.600056		313.544	8.78741	327.812	13.4066	430.371	85.3213	313.544	8.78741	NA
JG-AW31-85	145.197	4808.76	0.810858	23.5405	15.2315	0.118833	15.3365	0.0202885	1.79201	0.116845		129.479	2.29713	114.013	16.5412	-197.972	383.295	129.479	2.29713	NA
JG-AW31-86	203.633	282473	1.86694	6.26801	0.721473	10.0456	1.49316	0.456674	1.30728	0.875517		2424.85	26.4201	2438.99	13.7895	2450.78	12.2064	2450.78	12.2064	98.9422
JG-AW31-87	126.449	8372.67	0.63872	19.6531	7.38673	0.393232	7.61706	0.0560503	1.85898	0.244055		351.56	6.36043	336.727	21.8328	235.539	170.623	351.56	6.36043	NA
JG-AW31-88	247.912	18971.8	0.937055	18.9095	10.5145	0.16074	10.585	0.0220445	1.21956	0.115216		140.565	1.69571	151.35	14.8847	323.788	239.35	140.565	1.69571	NA
JG-AW31-89	180.837	11776.4	0.824924	20.1225	8.39307	0.24045	8.54255	0.0350918	1.59108	0.186254		222.338	3.47726	218.789	16.8153	180.762	195.868	222.338	3.47726	NA
JG-AW31-90	183.843	17398.3	2.23578	19.2601	4.66012	0.286865	5.47341	0.0400715	2.8708	0.524499		253.276	7.13006	256.089	12.3895	281.944	106.676	253.276	7.13006	NA
JG-AW31-91	154.92	8734.25	1.37896	20.6133	10.177	0.280613	10.5742	0.0419521	2.87129	0.271536		264.921	7.45249	251.143	23.5313	124.31	240.157	264.921	7.45249	NA
JG-AW31-92	448.236	35305.8	5.39483	19.6837	2.2586	0.287719	5.52073	0.0410747	5.03758	0.912484		259.491	12.8125	256.762	12.5255	231.896	52.165	259.491	12.8125	NA
JG-AW31-93	315.604	269.447	0.426082	15.9913	24.7018	0.190866	24.866	0.0221367	2.85328	0.114746		141.146	3.98351	177.368	40.4885	692.437	534.272	141.146	3.98351	NA
JG-AW31-94	300.174	18761.6	1.177	19.4104	3.37469	0.30222	3.64899	0.0425456	1.38801	0.380382		268.593	3.6515	268.133	8.59907	264.138	77.4923	268.593	3.6515	NA
JG-AW31-95	195.504	35726.4	2.31419	16.232	2.01496	0.887419	5.21501	0.104472	4.81002	0.922341		640.562	29.33	644.982	24.9019	660.494	43.2042	640.562	29.33	96.9822
JG-AW31-96	131.469	6096.15	0.656257	21.01	30.4791	0.116149	30.7459	0.0176987	4.04129	0.131442		113.096	4.53066	111.575	32.4982	79.2277	738.783	113.096	4.53066	NA
JG-AW31-97	481.517	6724.89	0.893611	19.4804	3.69936	0.290633	4.64667	0.0410622	2.81181	0.605125		259.414	7.14942	259.057	10.625	255.82	85.069	259.414	7.14942	NA
JG-AW31-98	47.7295	3871.42	1.40616	21.9586	22.8587	0.226259	23.3286	0.0360337	4.6584	0.199686		228.201	10.4446	207.106	43.7331	-26.6411	560.018	228.201	10.4446	NA
JG-AW31-99	171.397	75327.7	2.13207	13.5359	1.10528	1.8057	1.70697	0.177268	1.30081	0.762058		1052.03	12.6267	1047.52	11.1552	1038.11	22.3366	1038.11	22.3366	101.341
JG-AW31-100	200.355	30723.2	1.23763	17.2304	2.45986	0.728052	2.8193	0.0909821	1.37751	0.488602		561.343	7.40547	555.409	12.0614	531.179	53.9088	561.343	7.40547	105.679
JG-AW31-101	191.749	5924.55	0.532195	18.6445	6.13723	0.293965	6.30676	0.0397508	1.45249	0.230306		251.288	3.5797	261.675	14.5492	355.761	138.686	251.288	3.5797	NA
JG-AW31-102	734.987	30395.5	1.20365	18.528	0.699917	0.462082	2.49162	0.0620935	2.3913	0.959735		388.345	9.0123	385.705	7.99593	369.879	15.7563	388.345	9.0123	NA
JG-AW31-103	263.949	23892.5	3.54902	14.5516	3.12704	0.819487	6.19063	0.0864872	5.34281	0.863047		534.729	27.4169	607.762	28.3185	890.355	64.603	534.729	27.4169	60.0579
JG-AW31-104	282.239	44496	1.92563	18.0878	2.33952	0.569199	2.63637	0.0746706	1.21536	0.460998		464.233	5.44374	457.496	9.71035	423.776	52.2136	464.233	5.44374	109.547
JG-AW31-105	368.971	29076.5	0.5609	19.4145	3.07309	0.330887	3.18288	0.0465912	0.82877	0.260384		293.559	2.37837	290.243	8.03521	263.645	70.5511	293.559	2.37837	NA
JG-AW31-106	252.02	14294.4	0.950813	20.4842	5.4622	0.264782	5.77154	0.0393375	1.86415	0.322991		248.725	4.54831	238.513	12.2692	139.108	128.356	248.725	4.54831	NA
JG-AW31-107	900.201	12398	1.41337	19.3537	8.43872	0.132183	8.63137	0.018554	1.81347	0.210102		118.511	2.12953	126.057	10.2325	270.796	193.776	118.511	2.12953	NA
JG-AW32
JG-AW32-1	639.265	10052.7	1.16551	20.5217	5.71671	0.112194	6.22249	0.0166987	2.45735	0.394914		106.758	2.6018	107.97	6.37366	134.829	134.452	106.758	2.6018	NA
JG-AW32-2	288.504	12323.9	1.14804	20.6859	8.35901	0.114748	8.54416	0.0172155	1.76908	0.207052		110.034	1.93007	110.3	8.93059	116.042	197.414	110.034	1.93007	NA
JG-AW32-3	243.658	9003.82	1.5339	20.8808	8.86502	0.118312	8.97522	0.0179174	1.40214	0.156224		114.481	1.59101	113.541	9.64173	93.8934	210.29	114.481	1.59101	NA
JG-AW32-4	274.408	11321.6	0.857231	21.2663	10.9706	0.116442	11.0231	0.0179598	1.07507	0.0975288		114.749	1.22272	111.841	11.6742	50.3851	262.599	114.749	1.22272	NA
JG-AW32-5	142.646	20211.2	0.531637	20.0298	15.549	0.129363	17.069	0.0187926	7.04138	0.412523		120.021	8.37293	123.525	19.8551	191.549	363.527	120.021	8.37293	NA
JG-AW32-6	69.7258	6428.26	0.845926	22.1752	20.6771	0.116923	20.9919	0.0188047	3.6218	0.172533		120.097	4.30942	112.279	22.3167	-50.4697	507.814	120.097	4.30942	NA
JG-AW32-7	76.5689	2933.04	0.806896	29.0587	44.4489	0.0901984	44.7174	0.0190097	4.89333	0.109428		121.394	5.88462	87.6881	37.5836	-755.908	1302.6	121.394	5.88462	NA
JG-AW32-8	107.495	3676.52	1.27111	31.087	47.1215	0.0885977	47.2294	0.0199756	3.19092	0.0675621		127.502	4.0285	86.1962	39.0491	-949.53	1447.78	127.502	4.0285	NA
JG-AW32-9	252.855	8315.91	1.36065	22.1815	3.83724	0.124638	4.04611	0.0200513	1.2832	0.317144		127.98	1.62604	119.268	4.55313	-51.1649	93.417	127.98	1.62604	NA
JG-AW32-10	117.063	4052.02	1.38642	20.4273	15.0125	0.136535	15.1817	0.0202281	2.26	0.148864		129.098	2.88859	129.953	18.5208	145.651	353.818	129.098	2.88859	NA
JG-AW32-11	184.351	4194.41	1.87978	18.0101	33.5755	0.156633	33.6253	0.0204596	1.82884	0.0543889		130.56	2.36372	147.752	46.2683	433.386	767.824	130.56	2.36372	NA
JG-AW32-12	176.112	4454.97	0.746795	22.9493	7.52864	0.123789	8.3905	0.020604	3.70406	0.441459		131.472	4.82048	118.501	9.38486	-134.665	186.444	131.472	4.82048	NA
JG-AW32-13	427.518	12816.8	0.938601	20.593	4.83585	0.13896	5.05261	0.0207543	1.46406	0.289762		132.421	1.91895	132.117	6.2594	126.676	113.9	132.421	1.91895	NA
JG-AW32-14	250.404	8647.42	1.02893	20.3483	13.8833	0.140691	13.9174	0.0207631	0.973346	0.0699373		132.477	1.2763	133.659	17.4312	154.738	326.436	132.477	1.2763	NA
JG-AW32-15	318.002	26337.9	1.11832	20.7564	5.4222	0.138706	6.1268	0.0208808	2.85262	0.465597		133.22	3.76128	131.891	7.57803	108.031	128.144	133.22	3.76128	NA
JG-AW32-16	239.169	20870.4	1.6307	19.8641	5.67763	0.14498	5.85213	0.020887	1.41846	0.242384		133.259	1.87083	137.47	7.52423	210.793	131.702	133.259	1.87083	NA
JG-AW32-17	124.056	9561.61	0.93265	19.3989	15.0709	0.238227	15.1946	0.0335171	1.93534	0.12737		212.523	4.04599	216.968	29.6917	265.48	347.55	212.523	4.04599	NA
JG-AW32-18	221.374	22960.1	0.935923	20.2155	6.25397	0.23432	6.44558	0.0343552	1.55991	0.242012		217.748	3.33995	213.759	12.425	170.005	146.146	217.748	3.33995	NA
JG-AW32-19	139.844	9010.46	0.762391	20.9434	12.6168	0.227853	12.7754	0.0346099	2.00668	0.157074		219.336	4.32735	208.425	24.0766	86.813	300.181	219.336	4.32735	NA
JG-AW32-20	380.595	31998.7	2.42354	19.4678	3.50333	0.247134	4.31429	0.0348938	2.51789	0.583616		221.104	5.47277	224.245	8.68099	257.335	80.5353	221.104	5.47277	NA
JG-AW32-21	373.158	28073.2	0.772303	19.6648	4.96194	0.244919	5.14822	0.0349309	1.37233	0.266564		221.335	2.98589	222.44	10.2845	234.165	114.567	221.335	2.98589	NA
JG-AW32-22	413.751	29802	0.908207	19.8864	3.04745	0.252493	3.34444	0.036417	1.3778	0.411968		230.585	3.12086	228.6	6.84596	208.199	70.6999	230.585	3.12086	NA
JG-AW32-23	263.741	20011.1	1.10047	20.8011	4.93128	0.242062	5.24966	0.0365185	1.80039	0.342953		231.217	4.08903	220.108	10.3887	102.93	116.623	231.217	4.08903	NA
JG-AW32-24	379.7	13269.3	1.77607	19.7723	3.98567	0.257139	4.05339	0.0368743	0.737859	0.182035		233.429	1.69157	232.358	8.41865	221.516	92.2221	233.429	1.69157	NA
JG-AW32-25	347.946	37559.2	1.00232	19.6025	3.73535	0.260952	6.77417	0.0370996	5.65124	0.834234		234.83	13.032	235.433	14.2356	241.456	86.1119	234.83	13.032	NA
JG-AW32-26	181.609	19395.8	1.48552	19.8799	6.7837	0.257843	7.15632	0.0371765	2.27909	0.318472		235.308	5.26617	232.927	14.8963	208.948	157.421	235.308	5.26617	NA
JG-AW32-27	59.2337	5343.01	1.1927	23.3309	20.7566	0.219764	21.3869	0.0371867	5.15406	0.240991		235.371	11.9124	201.714	39.1448	-175.622	522.245	235.371	11.9124	NA
JG-AW32-28	225.304	24760.1	0.780574	19.8861	4.67991	0.259972	4.88683	0.0374951	1.40695	0.287907		237.288	3.27783	234.644	10.2385	208.273	108.564	237.288	3.27783	NA
JG-AW32-29	130.925	17178.2	1.06086	20.1844	9.92137	0.256271	10.0763	0.0375157	1.76012	0.174679		237.416	4.10278	231.657	20.8741	173.599	231.982	237.416	4.10278	NA
JG-AW32-30	151.282	15907.5	1.17439	20.7076	7.51088	0.249911	7.71135	0.0375331	1.74687	0.226532		237.524	4.07371	226.504	15.6567	113.581	177.412	237.524	4.07371	NA
JG-AW32-31	118.675	10369.8	0.629329	20.4774	9.64335	0.255627	9.79911	0.0379649	1.74022	0.17759		240.206	4.1032	231.137	20.2591	139.859	226.859	240.206	4.1032	NA
JG-AW32-32	105.45	10678.8	1.28395	18.7813	10.4923	0.282044	10.7279	0.0384187	2.23627	0.208453		243.024	5.33351	252.278	23.9685	339.201	238.198	243.024	5.33351	NA
JG-AW32-33	137.281	13941.4	0.825418	18.9639	6.22421	0.279768	6.51647	0.038479	1.92966	0.296121		243.398	4.60921	250.473	14.4657	317.25	141.635	243.398	4.60921	NA
JG-AW32-34	570.994	56940.9	1.05401	19.2104	1.87131	0.276361	2.85534	0.0385046	2.15667	0.755308		243.557	5.15472	247.767	6.27765	287.842	42.7793	243.557	5.15472	NA
JG-AW32-35	81.3572	6143.97	0.996494	22.1357	16.5914	0.240246	16.6354	0.0385699	1.20781	0.0726051		243.962	2.89155	218.622	32.7311	-46.1397	405.789	243.962	2.89155	NA
JG-AW32-36	109.457	11052.6	1.12753	19.0948	9.75958	0.280175	10.033	0.0388011	2.3263	0.231865		245.397	5.60139	250.797	22.2993	301.612	222.979	245.397	5.60139	NA
JG-AW32-37	99.9747	8759.72	1.20231	20.2085	18.6883	0.266621	18.8864	0.0390776	2.72798	0.144442		247.113	6.61361	239.989	40.3882	170.81	439.635	247.113	6.61361	NA
JG-AW32-38	450.014	43340.9	1.69957	19.4851	3.36855	0.278113	3.57312	0.0393027	1.19167	0.333511		248.509	2.90506	249.16	7.89475	255.314	77.466	248.509	2.90506	NA
JG-AW32-39	137.483	10526.9	1.19648	19.6355	6.81611	0.277824	7.55323	0.0395649	3.25452	0.430878		250.136	7.98481	248.93	16.6763	237.571	157.367	250.136	7.98481	NA
JG-AW32-40	81.1994	4858.42	1.00971	23.0906	18.6719	0.237107	18.8124	0.039708	2.29488	0.121987		251.023	5.64995	216.049	36.6268	-149.869	466.646	251.023	5.64995	NA
JG-AW32-41	171.483	13808.3	1.75739	19.5506	6.01337	0.284746	6.13386	0.0403753	1.20978	0.19723		255.159	3.02657	254.415	13.8048	247.588	138.529	255.159	3.02657	NA
JG-AW32-42	42.6527	8733.67	1.66713	21.5278	45.0279	0.259194	45.0808	0.0404691	2.18282	0.0484202		255.74	5.47307	234.017	94.4942	21.0992	1133.13	255.74	5.47307	NA
JG-AW32-43	295.285	28310.1	0.996193	19.3458	3.49703	0.289779	3.56292	0.0406586	0.682076	0.191437		256.914	1.71789	258.386	8.12826	271.737	80.1803	256.914	1.71789	NA
JG-AW32-44	217.507	19556.1	1.2977	19.903	6.36085	0.282529	6.82722	0.0407832	2.48	0.363253		257.686	6.26457	252.662	15.2722	206.266	147.662	257.686	6.26457	NA
JG-AW32-45	110.804	5196.1	1.09093	19.3207	6.59263	0.295279	6.7962	0.0413765	1.65093	0.242919		261.359	4.22855	262.706	15.7326	274.711	151.157	261.359	4.22855	NA
JG-AW32-46	82.4799	6450.56	0.878577	22.5437	18.0157	0.253182	18.0704	0.0413959	1.40548	0.0777777		261.479	3.6015	229.158	37.0861	-90.7374	444.875	261.479	3.6015	NA
JG-AW32-47	201.244	18074.4	1.5165	19.9619	5.18266	0.286779	5.48016	0.0415192	1.78107	0.325003		262.243	4.577	256.021	12.4019	199.424	120.459	262.243	4.577	NA
JG-AW32-48	449.851	53003.9	3.1425	17.4188	13.6365	0.333419	14.1752	0.0421217	3.87079	0.273067		265.971	10.0857	292.173	36.0052	507.272	301.179	265.971	10.0857	NA
JG-AW32-49	107.436	12562.1	2.61644	19.558	13.3767	0.301639	13.4902	0.0427869	1.74628	0.129448		270.085	4.619	267.679	31.7531	246.668	309.215	270.085	4.619	NA
JG-AW32-50	120.221	9412.16	1.599	20.3746	6.85481	0.295629	7.08109	0.0436851	1.7758	0.250781		275.635	4.79155	262.98	16.4072	151.691	160.742	275.635	4.79155	NA
JG-AW32-51	203.199	31358.2	1.58101	20.5966	5.40614	0.308314	6.4728	0.0460562	3.55961	0.549933		290.263	10.1031	272.873	15.4895	126.257	127.323	290.263	10.1031	NA
JG-AW32-52	180.507	14420.3	1.4867	19.4953	4.37455	0.334264	4.55206	0.0472628	1.25878	0.276531		297.695	3.66212	292.816	11.5799	254.072	100.625	297.695	3.66212	NA
JG-AW32-53	46.415	4234.22	1.56634	21.6147	20.2143	0.303652	20.5432	0.0476019	3.6611	0.178215		299.782	10.724	269.249	48.6232	11.4531	490.454	299.782	10.724	NA
JG-AW32-54	276.978	59458.4	0.979967	19.0653	4.13774	0.348969	4.18199	0.0482536	0.60674	0.145084		303.791	1.80046	303.945	10.9854	305.117	94.3159	303.791	1.80046	NA
JG-AW32-55	398.321	45676.3	1.94934	18.9038	2.50152	0.368106	3.9409	0.0504686	3.04517	0.772711		317.398	9.43124	318.249	10.767	324.482	56.8096	317.398	9.43124	NA
JG-AW32-56	45.3794	6349.48	1.21231	20.7592	18.9243	0.349484	19.2232	0.0526182	3.37648	0.175646		330.576	10.8805	304.333	50.5911	107.721	450.47	330.576	10.8805	NA
JG-AW32-57	282.588	27513.2	1.57866	18.957	1.7323	0.391665	1.90941	0.0538498	0.803098	0.4206		338.114	2.6454	335.585	5.45649	318.074	39.3612	338.114	2.6454	NA
JG-AW32-58	111.537	8955.66	1.24734	20.4218	10.7349	0.369218	10.8081	0.0546857	1.25593	0.116203		343.225	4.19793	319.073	29.6014	146.292	252.363	343.225	4.19793	NA
JG-AW32-59	303.009	24177	1.81658	18.2597	1.77243	0.413686	2.8165	0.0547854	2.18887	0.777161		343.834	7.32891	351.526	8.36889	402.633	39.6973	343.834	7.32891	NA
JG-AW32-60	92.772	7293.12	1.20745	18.8403	11.3049	0.406772	11.396	0.0555826	1.43779	0.126166		348.705	4.88046	346.548	33.4709	332.105	257.083	348.705	4.88046	NA
JG-AW32-61	249.23	37993.4	2.71045	17.4293	2.55571	0.44051	4.86858	0.0556847	4.14383	0.851139		349.328	14.0904	370.612	15.1183	505.959	56.2308	349.328	14.0904	NA
JG-AW32-62	390.608	66170.2	1.60379	18.7505	1.15839	0.412656	1.541	0.0561176	1.01628	0.659492		351.971	3.48111	350.786	4.57075	342.945	26.2178	351.971	3.48111	NA
JG-AW32-63	155.02	22914.1	1.21243	18.3017	2.72577	0.424877	2.99515	0.0563966	1.24142	0.414475		353.674	4.27229	359.533	9.06872	397.494	61.1251	353.674	4.27229	NA
JG-AW32-64	96.6587	6398.07	1.39916	19.11	5.89852	0.416738	6.19432	0.0577593	1.89129	0.305326		361.984	6.6575	353.716	18.5031	299.78	134.632	361.984	6.6575	NA
JG-AW32-65	288.39	56308.8	1.61128	18.4972	1.33915	0.447764	1.75937	0.0600694	1.14108	0.648572		376.048	4.16825	375.712	5.52515	373.624	30.1308	376.048	4.16825	NA
JG-AW32-66	145.81	18538.2	1.98483	18.0049	4.25848	0.51376	4.57877	0.0670886	1.68242	0.367438		418.591	6.81867	420.974	15.7804	434.028	94.8882	418.591	6.81867	96.4434
JG-AW32-67	54.9908	9745.27	0.790841	18.64	10.6677	0.511669	10.9958	0.0691726	2.66601	0.242457		431.169	11.119	419.571	37.8087	356.311	241.469	431.169	11.119	121.009
JG-AW32-68	75.646	18630.9	1.83228	18.7142	6.82869	0.515985	7.04039	0.0700338	1.71351	0.243383		436.359	7.22961	422.466	24.3362	347.347	154.58	436.359	7.22961	125.626
JG-AW32-69	205.007	24661	2.30608	17.5674	3.21235	0.564461	3.41363	0.0719185	1.15486	0.338309		447.703	4.99491	454.426	12.5066	488.573	70.9078	447.703	4.99491	91.6349
JG-AW32-70	275.457	42035.4	3.38315	17.6888	0.963081	0.577972	1.48324	0.0741487	1.12804	0.760525		461.102	5.01975	463.158	5.51637	473.36	21.3133	461.102	5.01975	97.4103
JG-AW32-71	74.0268	10405.2	1.78647	18.3307	7.00235	0.56486	7.47174	0.0750963	2.60651	0.348849		466.786	11.7368	454.685	27.3919	393.94	157.241	466.786	11.7368	118.492
JG-AW32-72	165.426	14026.1	2.36772	18.077	3.25024	0.573488	3.59164	0.0751882	1.52833	0.425524		467.338	6.8897	460.268	13.2925	425.111	72.5212	467.338	6.8897	109.933
JG-AW32-73	80.5517	18749.3	0.745862	17.9424	7.48598	0.57877	7.72961	0.0753156	1.92537	0.24909		468.101	8.69324	463.67	28.78	441.762	166.699	468.101	8.69324	105.962
JG-AW32-74	47.0914	8456.58	2.85054	19.7784	12.6095	0.525505	13.0149	0.0753818	3.22326	0.247659		468.498	14.5653	428.822	45.5539	220.845	292.697	468.498	14.5653	212.139
JG-AW32-75	87.1507	13241.4	1.07256	17.6859	3.5134	0.635732	3.81639	0.0815453	1.49024	0.390484		505.34	7.24317	499.66	15.0618	473.726	77.7618	505.34	7.24317	106.673
JG-AW32-76	201.921	30807.9	0.871077	17.2997	1.37635	0.651592	2.26775	0.0817546	1.80232	0.794762		506.587	8.78081	509.458	9.08468	522.341	30.1858	506.587	8.78081	96.9839
JG-AW32-77	312.305	55890.8	1.41334	17.245	0.922665	0.655792	1.3751	0.0820216	1.01961	0.741477		508.178	4.98245	512.037	5.53005	529.32	20.2291	508.178	4.98245	96.0058
JG-AW32-78	147.554	24357.9	2.18448	17.2494	1.20877	0.665749	1.56313	0.083288	0.99108	0.634035		515.719	4.91208	518.125	6.34354	528.768	26.4791	515.719	4.91208	97.5322
JG-AW32-79	46.3397	12051.1	0.945606	18.8425	12.9067	0.628696	13.1507	0.085917	2.52128	0.191723		531.344	12.8595	495.283	51.5885	331.834	293.761	531.344	12.8595	160.124
JG-AW32-80	196.567	60593.3	5.86635	17.0171	3.85047	0.697113	4.34738	0.0860373	2.01832	0.46426		532.059	10.3074	537.065	18.1341	558.387	83.9891	532.059	10.3074	95.2849
JG-AW32-81	69.93	11738.1	1.66928	17.7127	6.21934	0.671381	6.42859	0.0862489	1.62682	0.25306		533.314	8.32686	521.552	26.2262	470.345	137.756	533.314	8.32686	113.388
JG-AW32-82	437.251	257106	2.27007	17.1825	1.18355	0.692829	1.42043	0.0863399	0.785387	0.552923		533.854	4.02391	534.499	5.90293	537.251	25.8778	533.854	4.02391	99.3678
JG-AW32-83	139.737	38064	3.76333	16.7076	2.92641	0.73965	4.19337	0.0896271	3.00341	0.716229		553.332	15.9256	562.201	18.1052	598.261	63.3783	553.332	15.9256	92.49
JG-AW32-84	138.879	24975.3	0.964384	17.2233	2.44901	0.719145	2.65592	0.0898324	1.02775	0.386963		554.546	5.46106	550.162	11.2815	532.074	53.6642	554.546	5.46106	104.223
JG-AW32-85	223.654	158498	2.16769	16.6748	1.1954	0.759376	1.7351	0.0918367	1.25762	0.724809		566.391	6.81907	573.65	7.60432	602.497	25.8509	566.391	6.81907	94.0072
JG-AW32-86	374.821	53665.3	0.726581	16.6477	1.31231	0.802273	2.00878	0.0968671	1.52086	0.757109		596.023	8.65827	598.11	9.07977	606.011	28.4057	596.023	8.65827	98.3518
JG-AW32-87	267.057	67350.4	0.824897	16.8755	1.96671	0.802353	2.24674	0.098202	1.08624	0.483475		603.863	6.26158	598.155	10.156	576.552	42.747	603.863	6.26158	104.737
JG-AW32-88	88.9437	32002.9	2.71025	15.271	3.78497	0.963815	4.07745	0.106748	1.51644	0.37191		653.834	9.42878	685.271	20.3221	789.895	79.4718	653.834	9.42878	82.7747
JG-AW32-89	529.805	106046	32.8381	16.3669	0.402503	0.908724	3.95194	0.107869	3.93139	0.9948		660.362	24.6761	656.379	19.1065	642.734	8.63279	660.362	24.6761	102.743
JG-AW32-90	606.432	159112	1.99569	16.0084	0.369613	0.959659	0.889338	0.11142	0.808893	0.909545		680.989	5.2275	683.12	4.42217	690.165	7.89383	680.989	5.2275	98.6705
JG-AW32-91	256.902	121160	2.68583	15.715	1.84448	0.979737	2.51029	0.111666	1.70277	0.678316		682.417	11.0261	693.47	12.6147	729.496	39.0752	682.417	11.0261	93.5463
JG-AW32-92	185.865	72712.8	3.30264	15.056	1.71832	1.12239	3.73282	0.122561	3.31381	0.887749		745.285	23.3232	764.119	20.0466	819.62	35.9046	745.285	23.3232	90.9306
JG-AW32-93	39.2381	15192.8	3.10023	14.7246	6.25472	1.22521	6.72132	0.130843	2.46061	0.366091		792.676	18.3532	812.156	37.5943	865.944	129.809	792.676	18.3532	91.5389
JG-AW32-94	148.335	78681.4	1.96608	14.0905	0.911528	1.51487	1.49252	0.154811	1.18184	0.79184		927.876	10.2134	936.408	9.12899	956.518	18.6455	956.518	18.6455	97.0056
JG-AW32-95	299.892	78627	8.29247	13.7427	1.00961	1.53706	4.41447	0.153201	4.29747	0.973496		918.883	36.8038	945.329	27.1627	1007.42	20.4719	1007.42	20.4719	91.2111
JG-AW32-96	499.691	216297	2.93186	13.7375	0.387042	1.55266	0.89189	0.154697	0.803533	0.900933		927.24	6.93963	951.553	5.50845	1008.19	7.84972	1008.19	7.84972	91.9703
JG-AW32-97	255.673	88089.7	3.07384	13.6575	0.534291	1.76515	1.75467	0.174844	1.67135	0.952514		1038.75	16.0346	1032.74	11.3738	1020.03	10.8172	1020.03	10.8172	101.835
JG-AW32-98	453.304	135326	5.55551	13.6305	0.519935	1.62937	1.74381	0.161076	1.6645	0.954516		962.751	14.8858	981.616	10.9727	1024.03	10.5208	1024.03	10.5208	94.0155
[truncated: 4,279 more rows]
